# Supplementary material for: Seroprevalence Assessment and Risk Factor Analysis of Toxoplasma gondii Infection in Goats from Northeastern Algeria
Source: MDPI journal article supplement (doi:10.3390/ani14060883), 2024-03-13
Supplement: s1 [file s1]

**Table S1.** Univariate analysis of explanatory risk factors associated to *T. gondii* infection goat population from Northeastern Algeria, with P-value  $\geq 0.05$ .

| Variable                       | Categories             | Negative | Positive (%) | OR (95% CI)            | P-value |
|--------------------------------|------------------------|----------|--------------|------------------------|---------|
| Individual related factors     |                        |          |              |                        |         |
| Gender                         | Male                   | 73       | 85 (53.8)    | 1.0334 (0.7026-1.52)   | 0.862   |
|                                | Female                 | 142      | 160 (52.98)  |                        |         |
| Age                            | <2 years               | 89       | 92 (50.83)   | —                      | 0.272   |
|                                | 2-5 years              | 88       | 118 (57.28)  | 0.7709 (0.516- 1.1517) |         |
|                                | >5 years               | 38       | 35 (47.95)   | 0.6869 (0.402- 1.1737) |         |
| Body conditions                | Poor                   | 59       | 55 (48.25)   | —                      | 0.597   |
|                                | Medium                 | 47       | 56 (54.37)   | 0.7824 (0.4586-1.3347) |         |
|                                | Good                   | 100      | 120 (54.55)  | 1.0071 (0.6296-1.6112) |         |
|                                | Very good              | 9        | 14 (60.87)   | 0.7714 (0.3205-1.857)  |         |
|                                | Non breeder            | 49       | 42 (46.15)   | —                      |         |
| Management system              | Extensive              | 13       | 11 (45.83)   | 0.2962 (0.0913-0.961)  | 0.102   |
|                                | Intensive              | 7        | 20 (74.07)   | 0.4113 (0.1681-1.006)  |         |
|                                | Semi-intensive         | 120      | 141 (54.02)  | 1.2072 (0.8061-1.8079) |         |
|                                | Semi-extensive         | 75       | 73 (49.32)   | —                      |         |
|                                |                        |          |              |                        |         |
| Herd related factors           |                        |          |              |                        |         |
| Type of production             | Milk                   | 80       | 97 (54.8)    | —                      | 0.804   |
|                                | Meat                   | 31       | 37 (54.41)   | 1.0159 (0.5794-1.7813) |         |
|                                | Mixed                  | 104      | 111 (51.63)  | 0.8942 (0.5174-1.5454) |         |
| Herd size                      | 1-10                   | 106      | 103 (49.28)  | —                      | 0.294   |
|                                | 11-30                  | 101      | 131 (56.47)  | 0.7492 (0.5147-1.0904) |         |
|                                | ≥31                    | 8        | 11 (57.89)   | 1.0601 (0.4112-2.7329) |         |
| Size of pasture area           | 10H                    | 80       | 101 (55.80)  | —                      | 0.059   |
|                                | 11-50H                 | 124      | 122 (49.59)  | 1.2832 (0.8728-1.8865) |         |
|                                | ≥51H                   | 4        | 2 (33.33)    | 0.5082 (0.0914-2.8259) |         |
| Type of pasture area           | Plain                  | 77       | 85 (52.47)   | —                      | 0.160   |
|                                | Hill                   | 121      | 131 (51.98)  | 1.0196 (0.6868-1.5138) |         |
|                                | Mountain               | 10       | 9 (47.37)    | 0.8313 (0.3267-2.1151) |         |
| Common pastures                | No                     | 134      | 140 (51.09)  | 0.9096 (0.615- 1.3453) | 0.631   |
|                                | Yes                    | 74       | 85 (53.46)   |                        |         |
| Use of concentrate feed        | No                     | 76       | 68           | 1.423 (0.958-2.114)    | 0.080   |
|                                | Yes                    | 139      | 177          |                        |         |
| Watering type                  | Surface water          | 129      | 165 (56.12)  | 1.375 (0.9386- 2.0142) | 0.101   |
|                                | Surface and deep water | 86       | 80 (48.19)   |                        |         |
|                                | Tap water              | 111      | 142 (56.13)  |                        |         |
| Water source                   | Tap + valley water     | 30       | 37 (55.22)   | —                      | 0.218   |
|                                |                        |          |              | 1.0373 (0.6034-1.7831) |         |
|                                | Tap + well water       | 74       | 66 (47.14)   | 0.7232 (0.403-1.2978)  |         |
| Location of the water trough   | Internal               | 107      | 134 (55.6)   | —                      | 0.444   |
|                                | External               | 14       | 11 (44.00)   | 1.5939 (0.6953-3.6538) |         |
|                                | Mixed                  | 94       | 100 (51.55)  | 1.354 (0.5855-3.1313)  |         |
| Species on the farm            | Goats                  | 78       | 104 (57.14)  | 1.2955 (0.8894-1.8871) | 0.177   |
|                                | Goats+Sheep            | 137      | 141 (50.72)  |                        |         |
| Presence of other farm animals | No                     | 3        | 3 (50)       | 1.1415 (0.228-5.716)   | 0.872   |
|                                | Yes                    | 212      | 242 (53.3)   |                        |         |
| Presence of cattle             | No                     | 131      | 147 (52.88)  | 1.0397 (0.7148-1.5123) | 0.841   |
|                                | Yes                    | 84       | 98 (53.85)   |                        |         |
| Presence of equids             | No                     | 199      | 223 (52.84)  | 1.227 (0.6268-2.4021)  | 0.548   |
|                                | Yes                    | 16       | 22 (57.89)   |                        |         |
| Presence of                    | No                     | 11       | 138 (55.42)  | 0.8276 (0.5729-1.1955) | 0.312   |

|                                                |             |     |                |                         |       |
|------------------------------------------------|-------------|-----|----------------|-------------------------|-------|
| poultry                                        | Yes         | 104 | 107<br>(50.71) |                         |       |
| Presence of rodents                            | No          | 157 | 173 (52.42)    | 1.1266 (0.7493-1.6937)  | 0.565 |
|                                                | Yes         | 58  | 72 (55.38)     |                         |       |
| <b>Cat-related factors</b>                     |             |     |                |                         |       |
| Presence of cats                               | No          | 47  | 51 (52.04)     | 1.0642 (0.6807-1.6638)  | 0.791 |
|                                                | Yes         | 168 | 194 (53.59)    |                         |       |
| Access of cats to feed                         | No          | 155 | 160 (50.79)    | 1.3724 (0.9222-2.0423)  | 0.118 |
|                                                | Yes         | 60  | 85 (58.62)     |                         |       |
| Access of cats to water                        | No          | 86  | 103 (54.5)     | 0.9191 (0.6332-1.334)   | 0.654 |
|                                                | Yes         | 129 | 142 (52.4)     |                         |       |
| Cats for control of rodents                    | No          | 168 | 174 (50.88)    | 0.6856 (0.4481-1.0489)  | 0.081 |
|                                                | Yes         | 47  | 71 (60.17)     |                         |       |
| Control of cat's population                    | No          | 161 | 183 (53.2)     | 1.3825 (0.5236-3.6507)  | 0.511 |
|                                                | Yes         | 07  | 11 (61.11)     |                         |       |
| Birth of cats in the farm                      | No          | 153 | 185 (54.73)    | 0.8003 (0.5287-1.2115)  | 0.292 |
|                                                | Yes         | 62  | 60 (49.18)     |                         |       |
| Cats consume placenta                          | No          | 73  | 68 (48.23)     | 1.4238 (0.9315-2.1764)  | 0.102 |
|                                                | Yes         | 95  | 126 (57.01)    |                         |       |
| Presence of wild cats                          | No          | 189 | 217 (53.45)    | 0.938 (0.5313-1.6558)   | 0.823 |
|                                                | Yes         | 26  | 28 (51.85)     |                         |       |
| <b>Hygiene related factors</b>                 |             |     |                |                         |       |
| Quarantine                                     | No          | 166 | 197 (54.27)    | 0.8254 (0.5272-1.2925)  | 0.402 |
|                                                | Yes         | 49  | 48 (49.48)     |                         |       |
| Special place for parturition                  | No          | 180 | 199 (52.51)    | 1.1888 (0.7329-1.9282)  | 0.483 |
|                                                | Yes         | 35  | 46 (56.79)     |                         |       |
| Exchange of breeder                            | No          | 124 | 151 (54.91)    | 0.8483 (0.5839-1.2324)  | 0.388 |
|                                                | Yes         | 91  | 94 (50.81)     |                         |       |
| Slaughtering in the farm                       | No          | 201 | 229 (53.26)    | 1.003 (0.478-2.106)     | 0.993 |
|                                                | Yes         | 14  | 16 (53.333)    |                         |       |
| <b>Disease and herd health related factors</b> |             |     |                |                         |       |
| Deworming                                      | No          | 86  | 113 (56.78)    | 0.7788 (0.5374-1.1284)  | 0.185 |
|                                                | Yes         | 129 | 132 (50.57)    |                         |       |
| Use of Antimicrobials                          | No          | 133 | 155 (53.82)    | 0.9418 (0.6451-1.375)   | 0.751 |
|                                                | Yes         | 82  | 90 (52.33)     |                         |       |
| <b>Reproduction related factors</b>            |             |     |                |                         |       |
| Reproductive disorders                         | No          | 15  | 11 (42.31)     | 1.5955 (0.7165-3.5529)  | 0.248 |
|                                                | Yes         | 200 | 234 (53.92)    |                         |       |
| History of abortion                            | No          | 92  | 88 (48.89)     | 1.5682 (0.9823-2.5035)  | 0.058 |
|                                                | Yes         | 48  | 72 (60.00)     |                         |       |
| Stillbirth                                     | No          | 56  | 65 (53.72)     | 0.9685 (0.6373-1.4719)  | 0.887 |
|                                                | Yes         | 153 | 172 (52.92)    |                         |       |
| New born death                                 | No          | 138 | 141 (50.54)    | 1.3233 (0.8993-1.9473)  | 0.155 |
|                                                | Yes         | 71  | 96 (57.49)     |                         |       |
| Elimination of aborted products                | No          | 146 | 167 (53.35)    | 1.0564 (0.6788-1.644)   | 0.806 |
|                                                | Yes         | 48  | 58 (54.72)     |                         |       |
| <b>Spatio-temporal related factors</b>         |             |     |                |                         |       |
|                                                | Mila        | 130 | 140 (51.85)    | —                       |       |
| Province                                       | Constantine | 64  | 75 (53.96)     | 0.919 (0.6098-1.385)    | 0.682 |
|                                                | Guelma      | 18  | 23 (56.10)     | 0.9171 (0.4549-1.8491)  |       |
|                                                | El-Taref    | 3   | 7 (70.00)      | 0.5476 (0.1238-2.4214)  |       |
| Environment                                    | Rural       | 177 | 202 (53.3)     | 1.0085 (0.6236- 1.6312) | 1     |
|                                                | Peri-urban  | 38  | 43 (53.09)     |                         |       |
| Climate                                        | Humid       | 108 | 132 (55.00)    | —                       | 0.554 |

|           |     |             |                        |
|-----------|-----|-------------|------------------------|
| Sub-humid | 102 | 105 (50.72) | 1.1873 (0.8179-1.7236) |
| Semi-arid | 5   | 8 (61.54)   | 0.6434 (0.2037-2.0322) |

---

Ref.—reference value; OR—odds ratio; CI—confidence interval.
