# Supplementary material for: Seroprevalence Assessment and Risk Factor Analysis of Toxoplasma gondii Infection in Goats from Northeastern Algeria
Source: MDPI journal article supplement (doi:10.3390/ani14060883), 2024-03-13
Supplement: s1 [file s1]

**Table S2.** Sampling information of the 460 goat serum samples collected from Algeria.

| N° Sample | N° Herd | Gender | Age | Body Conditions | Physiology status |
|-----------|---------|--------|-----|-----------------|-------------------|
| 1         | 1       | M      | A   | Good            | Non breeder       |
| 2         | 1       | F      | C   | Good            | Lacting           |
| 3         | 1       | M      | A   | Good            | Non breeder       |
| 4         | 1       | F      | B   | Medium          | Pregnant          |
| 5         | 1       | F      | B   | Good            | Lacting           |
| 6         | 1       | M      | B   | Bad             | Non breeder       |
| 7         | 1       | F      | A   | Good            | Pregnant          |
| 8         | 1       | M      | A   | Good            | Non breeder       |
| 9         | 1       | M      | C   | V.good          | Breeder           |
| 10        | 1       | F      | A   | Good            | Lacting           |
| 11        | 1       | M      | B   | Good            | Non breeder       |
| 12        | 1       | F      | A   | Good            | Pregnant          |
| 13        | 2       | F      | B   | Good            | Pregnant          |
| 14        | 2       | M      | B   | Good            | Breeder           |
| 15        | 2       | F      | C   | Bad             | Lacting           |
| 16        | 2       | F      | B   | Good            | Lacting           |
| 17        | 2       | F      | A   | Good            | Pregnant          |
| 18        | 3       | M      | A   | Good            | Non breeder       |
| 19        | 3       | M      | A   | Bad             | Breeder           |
| 20        | 3       | F      | B   | Good            | Lacting           |
| 21        | 3       | F      | B   | Good            | Pregnant          |
| 22        | 3       | F      | A   | Good            | Pregnant          |
| 23        | 3       | F      | A   | Bad             | Pregnant          |
| 24        | 3       | F      | B   | V.good          | Lacting           |
| 25        | 3       | F      | B   | V.good          | Lacting           |
| 26        | 4       | F      | A   | Bad             | Lacting           |
| 27        | 4       | F      | A   | Good            | Lacting           |
| 28        | 4       | M      | A   | Good            | Breeder           |
| 29        | 4       | F      | B   | Good            | Pregnant          |
| 30        | 4       | F      | B   | Good            | Lacting           |
| 31        | 4       | F      | A   | Bad             | Pregnant          |
| 32        | 4       | F      | A   | Bad             | Lacting           |
| 33        | 5       | M      | A   | Good            | Breeder           |
| 34        | 5       | F      | A   | Good            | Pregnant          |
| 35        | 5       | F      | A   | Good            | Lacting           |
| 36        | 5       | F      | A   | Good            | Lacting           |
| 37        | 6       | M      | A   | Bad             | Non breeder       |
| 38        | 6       | F      | B   | Good            | Lacting           |
| 39        | 6       | F      | A   | Good            | Pregnant          |
| 40        | 6       | F      | A   | Bad             | Lacting           |
| 41        | 6       | M      | B   | Good            | Breeder           |
| 42        | 6       | F      | A   | Good            | Lacting           |
| 43        | 6       | F      | B   | Good            | Pregnant          |
| 44        | 6       | F      | B   | Bad             | Pregnant          |
| 45        | 6       | F      | C   | Good            | Lacting           |
| 46        | 7       | M      | B   | Good            | Breeder           |
| 47        | 7       | F      | A   | Good            | Lacting           |

|    |    |   |   |      |             |
|----|----|---|---|------|-------------|
| 48 | 7  | F | A | Bad  | Pregnant    |
| 49 | 7  | F | B | Good | Lacting     |
| 50 | 7  | M | B | Bad  | Non breeder |
| 51 | 7  | M | A | Good | Breeder     |
| 52 | 7  | M | A | Bad  | Non breeder |
| 53 | 7  | F | C | Bad  | Lacting     |
| 54 | 7  | F | B | Good | Lacting     |
| 55 | 7  | F | A | Good | Pregnant    |
| 56 | 8  | F | C | Good | Pregnant    |
| 57 | 8  | M | B | Bad  | Non breeder |
| 58 | 8  | F | B | Good | Lacting     |
| 59 | 8  | F | B | Bad  | Lacting     |
| 60 | 8  | M | C | Bad  | Breeder     |
| 61 | 8  | M | C | Good | Breeder     |
| 62 | 8  | F | B | Good | Pregnant    |
| 63 | 8  | M | A | Bad  | Non breeder |
| 64 | 8  | F | A | Bad  | Pregnant    |
| 65 | 8  | F | B | Good | Lacting     |
| 66 | 8  | F | B | Good | Lacting     |
| 67 | 9  | M | B | Good | Non breeder |
| 68 | 9  | F | A | Good | Lacting     |
| 69 | 9  | F | A | Bad  | Lacting     |
| 70 | 9  | M | B | Bad  | Non breeder |
| 71 | 9  | M | C | Good | Breeder     |
| 72 | 10 | F | A | Good | Lacting     |
| 73 | 10 | F | C | Good | Pregnant    |
| 74 | 10 | M | C | Good | Breeder     |
| 75 | 10 | F | B | Bad  | Lacting     |
| 76 | 10 | M | A | Bad  | Non breeder |
| 77 | 10 | F | A | Good | Lacting     |
| 78 | 10 | F | B | Good | Pregnant    |
| 79 | 11 | F | B | Good | Lacting     |
| 80 | 11 | F | A | Good | Pregnant    |
| 81 | 11 | F | B | Bad  | Pregnant    |
| 82 | 11 | F | A | Bad  | Lacting     |
| 83 | 11 | F | B | Good | Lacting     |
| 84 | 11 | F | C | Good | Pregnant    |
| 85 | 11 | M | A | Good | Breeder     |
| 86 | 11 | M | B | Bad  | Non breeder |
| 87 | 12 | M | A | Good | Breeder     |
| 88 | 12 | M | B | Bad  | Non breeder |
| 89 | 12 | F | B | Bad  | Lacting     |
| 90 | 12 | F | B | Good | Pregnant    |
| 91 | 12 | M | A | Good | Non breeder |
| 92 | 12 | M | B | Bad  | Non breeder |
| 93 | 12 | F | B | Good | Pregnant    |
| 94 | 12 | F | C | Good | Lacting     |
| 95 | 13 | F | C | Good | Lacting     |
| 96 | 13 | F | C | Good | Lacting     |
| 97 | 13 | M | B | Good | Breeder     |

|     |    |   |   |      |             |
|-----|----|---|---|------|-------------|
| 98  | 14 | M | A | Good | Breeder     |
| 99  | 14 | F | B | Good | Lacting     |
| 100 | 14 | F | A | Bad  | Lacting     |
| 101 | 14 | F | C | Good | Pregnant    |
| 102 | 14 | M | A | Bad  | Non breeder |
| 103 | 14 | M | C | Bad  | Non breeder |
| 104 | 14 | F | C | Good | Pregnant    |
| 105 | 14 | F | C | Bad  | Lacting     |
| 106 | 15 | F | A | Good | Lacting     |
| 107 | 15 | F | B | Bad  | Pregnant    |
| 108 | 15 | M | B | Good | Breeder     |
| 109 | 15 | M | A | Good | Non breeder |
| 110 | 15 | F | C | Good | Lacting     |
| 111 | 16 | F | C | Good | Pregnant    |
| 112 | 16 | F | B | Bad  | Lacting     |
| 113 | 16 | M | C | Bad  | Non breeder |
| 114 | 16 | M | B | Good | Breeder     |
| 115 | 16 | F | A | Bad  | Lacting     |
| 116 | 17 | M | B | Good | Breeder     |
| 117 | 17 | F | A | Bad  | Lacting     |
| 118 | 17 | M | B | Good | Non breeder |
| 119 | 17 | F | C | Good | Pregnant    |
| 120 | 17 | F | B | Bad  | Lacting     |
| 121 | 18 | F | B | Good | Lacting     |
| 122 | 18 | F | C | Good | Lacting     |
| 123 | 18 | M | B | Good | Breeder     |
| 124 | 18 | F | B | Bad  | Pregnant    |
| 125 | 18 | F | A | Good | Lacting     |
| 126 | 18 | F | A | Bad  | Pregnant    |
| 127 | 19 | F | B | Good | Pregnant    |
| 128 | 19 | F | C | Bad  | Lacting     |
| 129 | 19 | M | B | Good | Breeder     |
| 130 | 19 | M | B | Good | Non breeder |
| 131 | 19 | M | A | Bad  | Non breeder |
| 132 | 20 | M | C | Good | Breeder     |
| 133 | 20 | F | B | Good | Lacting     |
| 134 | 20 | M | C | Bad  | Non breeder |
| 135 | 20 | F | B | Good | Lacting     |
| 136 | 20 | F | B | Good | Lacting     |
| 137 | 20 | F | A | Bad  | Pregnant    |
| 140 | 21 | F | B | Good | Pregnant    |
| 141 | 21 | F | A | Good | Lacting     |
| 142 | 21 | F | B | Bad  | Lacting     |
| 143 | 21 | F | B | Good | Pregnant    |
| 144 | 21 | M | A | Bad  | Non breeder |
| 145 | 22 | M | A | Bad  | Non breeder |
| 146 | 22 | M | A | Good | Breeder     |
| 147 | 22 | F | A | Good | Lacting     |
| 148 | 22 | F | B | Good | Lacting     |
| 149 | 22 | M | B | Good | Breeder     |

|     |    |   |   |        |              |
|-----|----|---|---|--------|--------------|
| 150 | 22 | F | B | Bad    | Lacting      |
| 151 | 22 | F | A | Bad    | Pregnant     |
| 153 | 23 | F | B | Good   | Pregnant     |
| 154 | 23 | F | A | Bad    | Lacting      |
| 155 | 23 | M | A | Bad    | Non breeder  |
| 156 | 23 | M | A | Good   | Non breeder  |
| 157 | 24 | F | A | Good   | Lacting      |
| 158 | 24 | F | B | Good   | Lacting      |
| 159 | 24 | F | A | Good   | Pregnant     |
| 160 | 24 | M | B | Good   | Breeder      |
| 161 | 25 | F | C | Good   | Lacting      |
| 162 | 25 | F | C | Good   | Lacting      |
| 163 | 25 | F | A | Good   | Pregnant     |
| 164 | 25 | M | A | Good   | Breeder      |
| 165 | 26 | M | A | Good   | Non breeder  |
| 166 | 26 | M | B | Good   | Breeder      |
| 167 | 26 | F | C | Good   | Lacting      |
| 168 | 26 | F | B | Bad    | Lacting      |
| 169 | 26 | F | B | Bad    | Pregnant     |
| 170 | 26 | M | C | Bad    | Non breeder  |
| 171 | 26 | M | B | Good   | Non breeder  |
| 172 | 26 | F | B | Good   | Pregnant     |
| 173 | 26 | F | A | Bad    | Lacting      |
| 174 | 27 | F | C | Good   | Lacting      |
| 175 | 27 | M | C | Good   | Breeder      |
| 176 | 27 | F | C | Good   | Lacting      |
| 177 | 27 | F | C | Bad    | Pregnant     |
| 178 | 27 | M | A | Bad    | Non breeder  |
| 179 | 27 | F | C | Good   | Pregnant     |
| 180 | 28 | F | C | Good   | Lacting      |
| 181 | 28 | F | B | Bad    | Lacting      |
| 182 | 28 | M | C | Good   | Breeder      |
| 183 | 28 | M | A | Bad    | Non breeder  |
| 184 | 28 | F | B | Bad    | Pregnant     |
| 185 | 29 | F | A | Good   | Lacting      |
| 186 | 29 | F | C | Good   | Pregnant     |
| 187 | 29 | F | B | Bad    | Lacting      |
| 188 | 29 | M | C | Good   | Breeder      |
| 189 | 29 | F | A | Good   | Non pregnant |
| 190 | 29 | M | C | Good   | Non breeder  |
| 191 | 30 | F | A | Good   | Lacting      |
| 192 | 30 | F | B | Good   | Lacting      |
| 193 | 30 | F | B | Medium | Pregnant     |
| 194 | 30 | F | B | Bad    | Lacting      |
| 195 | 30 | M | A | Good   | Breeder      |
| 196 | 31 | M | C | Good   | Breeder      |
| 197 | 31 | F | B | V.good | Pregnant     |
| 198 | 31 | F | B | Good   | Lacting      |
| 199 | 31 | M | A | Good   | Non breeder  |
| 200 | 32 | F | A | Medium | Pregnant     |

|     |    |   |   |        |              |
|-----|----|---|---|--------|--------------|
| 201 | 32 | M | B | Good   | Breeder      |
| 202 | 32 | F | B | Good   | Lacting      |
| 203 | 32 | M | C | Bad    | Breeder      |
| 204 | 32 | M | B | Medium | Non breeder  |
| 205 | 32 | F | A | Bad    | Lacting      |
| 206 | 32 | M | A | Good   | Non breeder  |
| 207 | 32 | F | A | Bad    | Pregnant     |
| 208 | 32 | F | B | Medium | Lacting      |
| 209 | 33 | F | B | Good   | Pregnant     |
| 210 | 33 | F | A | Medium | Lacting      |
| 211 | 33 | F | A | Bad    | Lacting      |
| 212 | 33 | M | B | Good   | Breeder      |
| 213 | 33 | M | B | Medium | Non breeder  |
| 214 | 33 | F | A | Bad    | Lacting      |
| 215 | 33 | F | A | Good   | Pregnant     |
| 216 | 34 | F | A | Good   | Lacting      |
| 217 | 34 | F | B | Medium | Pregnant     |
| 218 | 34 | M | B | Medium | Breeder      |
| 219 | 34 | M | A | Bad    | Non breeder  |
| 220 | 34 | F | B | Good   | Lacting      |
| 221 | 34 | M | A | Good   | Non breeder  |
| 222 | 35 | F | A | Good   | Pregnant     |
| 223 | 35 | F | B | Medium | Lacting      |
| 224 | 35 | F | B | Medium | Lacting      |
| 225 | 35 | M | C | Good   | Breeder      |
| 226 | 35 | F | B | Bad    | Lacting      |
| 227 | 35 | M | B | Good   | Non breeder  |
| 228 | 35 | F | B | Medium | Lacting      |
| 229 | 36 | F | B | Good   | Lacting      |
| 230 | 36 | F | A | Medium | Pregnant     |
| 231 | 36 | F | A | Medium | Lacting      |
| 232 | 36 | M | A | Good   | Non breeder  |
| 233 | 36 | F | B | Bad    | Lacting      |
| 234 | 36 | F | B | Medium | Pregnant     |
| 235 | 37 | F | A | Good   | Lacting      |
| 236 | 37 | F | A | Bad    | Pregnant     |
| 237 | 37 | M | A | Good   | Breeder      |
| 238 | 37 | F | B | Medium | Non pregnant |
| 239 | 37 | F | B | Medium | Non pregnant |
| 240 | 37 | M | B | Bad    | Non breeder  |
| 241 | 38 | F | A | Bad    | Lacting      |
| 242 | 38 | M | B | Good   | Breeder      |
| 243 | 38 | M | B | Medium | Non breeder  |
| 244 | 38 | F | B | Good   | Pregnant     |
| 245 | 39 | M | A | Good   | Breeder      |
| 246 | 39 | F | A | Good   | Lacting      |
| 247 | 39 | F | B | Bad    | Pregnant     |
| 248 | 39 | F | B | Medium | Lacting      |
| 249 | 39 | F | B | Medium | Pregnant     |
| 250 | 40 | F | B | Good   | Pregnant     |

|     |    |   |   |        |             |
|-----|----|---|---|--------|-------------|
| 251 | 40 | F | A | Bad    | Lacting     |
| 252 | 40 | F | A | Bad    | Pregnant    |
| 253 | 40 | M | B | Good   | Breeder     |
| 254 | 40 | M | B | Medium | Non breeder |
| 255 | 40 | F | B | Medium | Lacting     |
| 256 | 40 | F | A | Medium | Lacting     |
| 257 | 41 | F | A | Medium | Lacting     |
| 258 | 41 | M | B | Medium | Non breeder |
| 259 | 41 | M | C | Good   | Breeder     |
| 260 | 41 | F | A | Good   | Lacting     |
| 261 | 41 | F | C | Medium | Pregnant    |
| 262 | 41 | M | C | Good   | Breeder     |
| 263 | 41 | F | B | Bad    | Lacting     |
| 264 | 42 | F | B | Bad    | Lacting     |
| 265 | 42 | F | A | Good   | Pregnant    |
| 266 | 42 | M | A | Medium | Non breeder |
| 267 | 42 | F | B | Medium | Lacting     |
| 268 | 42 | F | B | Good   | Pregnant    |
| 269 | 42 | F | B | Good   | Lacting     |
| 270 | 42 | M | A | Bad    | Non breeder |
| 271 | 42 | M | B | Bad    | Breeder     |
| 272 | 42 | F | C | Good   | Pregnant    |
| 273 | 43 | M | A | Good   | Non breeder |
| 274 | 43 | F | B | Bad    | Lacting     |
| 275 | 43 | M | A | Good   | Non breeder |
| 276 | 43 | F | B | Bad    | Lacting     |
| 277 | 43 | F | B | Medium | Lacting     |
| 278 | 43 | F | B | Medium | Pregnant    |
| 279 | 43 | M | A | Good   | Non breeder |
| 280 | 44 | M | B | V.good | Breeder     |
| 281 | 44 | F | B | V.good | Pregnant    |
| 282 | 44 | F | A | Medium | Lacting     |
| 283 | 44 | M | A | Medium | Non breeder |
| 284 | 44 | F | B | Good   | Lacting     |
| 285 | 44 | F | C | Bad    | Pregnant    |
| 286 | 45 | F | C | Good   | Lacting     |
| 287 | 45 | F | B | Medium | Lacting     |
| 288 | 45 | M | A | Bad    | Non breeder |
| 289 | 45 | M | A | Good   | Non breeder |
| 290 | 45 | F | A | Bad    | Pregnant    |
| 291 | 45 | F | B | Medium | Pregnant    |
| 292 | 45 | F | B | V.good | Lacting     |
| 293 | 45 | M | B | Good   | Breeder     |
| 294 | 45 | F | C | Medium | Lacting     |
| 295 | 46 | F | B | Bad    | Pregnant    |
| 296 | 46 | M | B | Good   | Breeder     |
| 297 | 46 | F | A | Good   | Lacting     |
| 298 | 46 | F | A | V.good | Lacting     |
| 299 | 46 | M | A | Medium | Non breeder |
| 300 | 46 | M | A | Medium | Non breeder |

|     |    |   |   |        |             |
|-----|----|---|---|--------|-------------|
| 301 | 47 | F | B | Medium | Lacting     |
| 302 | 47 | F | B | Good   | Lacting     |
| 303 | 47 | M | A | Good   | Breeder     |
| 304 | 47 | F | A | Medium | Pregnant    |
| 305 | 47 | F | B | Bad    | Pregnant    |
| 306 | 47 | F | B | Medium | Lacting     |
| 307 | 48 | F | A | Medium | Lacting     |
| 308 | 48 | F | B | Good   | Lacting     |
| 309 | 48 | M | A | Good   | Non breeder |
| 310 | 48 | F | B | V.good | Lacting     |
| 311 | 48 | F | B | Medium | Lacting     |
| 312 | 48 | M | A | Bad    | Non breeder |
| 313 | 48 | F | B | Medium | Lacting     |
| 314 | 49 | F | A | Bad    | Lacting     |
| 315 | 49 | F | B | Good   | Lacting     |
| 316 | 49 | F | B | Medium | Lacting     |
| 317 | 49 | F | B | Medium | Pregnant    |
| 318 | 49 | M | A | Medium | Non breeder |
| 319 | 50 | F | B | Medium | Lacting     |
| 320 | 50 | F | B | Good   | Lacting     |
| 321 | 50 | M | B | Good   | Breeder     |
| 322 | 51 | F | C | Bad    | Pregnant    |
| 323 | 51 | F | B | Good   | Pregnant    |
| 324 | 51 | M | B | Good   | Breeder     |
| 325 | 51 | F | A | V.good | Lacting     |
| 326 | 51 | F | B | Medium | Lacting     |
| 327 | 51 | F | C | Medium | Lacting     |
| 328 | 52 | F | B | Good   | Lacting     |
| 329 | 52 | F | A | Good   | Lacting     |
| 330 | 52 | F | B | Bad    | Lacting     |
| 331 | 52 | F | B | Medium | Pregnant    |
| 332 | 52 | F | C | Medium | Pregnant    |
| 333 | 52 | F | B | Bad    | Lacting     |
| 334 | 52 | M | B | Good   | Breeder     |
| 335 | 53 | F | A | Good   | Lacting     |
| 336 | 53 | F | B | Good   | Lacting     |
| 337 | 53 | M | B | Medium | Breeder     |
| 338 | 53 | F | B | V.good | Pregnant    |
| 339 | 53 | F | A | Medium | Pregnant    |
| 340 | 53 | M | A | Medium | Non breeder |
| 341 | 53 | M | A | Bad    | Non breeder |
| 342 | 54 | F | B | Good   | Lacting     |
| 343 | 54 | F | A | Medium | Lacting     |
| 344 | 54 | F | B | Medium | Lacting     |
| 345 | 54 | F | B | Medium | Pregnant    |
| 346 | 55 | F | B | Good   | Lacting     |
| 347 | 55 | F | A | Medium | Pregnant    |
| 348 | 55 | F | B | Medium | Lacting     |
| 349 | 55 | M | C | Medium | Breeder     |
| 350 | 56 | F | C | Good   | Lacting     |

|     |    |   |   |        |              |
|-----|----|---|---|--------|--------------|
| 351 | 56 | F | A | Medium | Pregnant     |
| 352 | 56 | F | B | Bad    | Pregnant     |
| 353 | 56 | M | A | Medium | Non breeder  |
| 354 | 56 | M | B | Good   | Breeder      |
| 355 | 57 | F | C | Good   | Lacting      |
| 356 | 57 | F | B | Bad    | Lacting      |
| 357 | 57 | F | B | Medium | Pregnant     |
| 358 | 57 | F | A | Medium | Pregnant     |
| 359 | 57 | F | A | Bad    | Lacting      |
| 360 | 57 | M | B | Good   | Breeder      |
| 361 | 58 | F | A | Bad    | Non pregnant |
| 362 | 58 | F | A | Good   | Non pregnant |
| 363 | 58 | F | C | Medium | Lacting      |
| 364 | 58 | M | B | Medium | Non breeder  |
| 365 | 58 | M | B | Medium | Breeder      |
| 366 | 58 | F | A | Medium | Non pregnant |
| 367 | 59 | F | B | Bad    | Pregnant     |
| 368 | 59 | F | A | Good   | Lacting      |
| 369 | 59 | M | A | Good   | Non breeder  |
| 370 | 59 | M | C | Medium | Breeder      |
| 371 | 59 | F | A | V.good | Lacting      |
| 372 | 59 | M | B | V.good | Breeder      |
| 373 | 59 | F | A | Medium | Pregnant     |
| 374 | 60 | F | C | Good   | Pregnant     |
| 375 | 60 | M | A | Good   | Breeder      |
| 376 | 60 | F | B | Bad    | Lacting      |
| 377 | 60 | M | B | Medium | Non breeder  |
| 378 | 60 | F | A | V.good | Non pregnant |
| 379 | 60 | M | A | Medium | Non breeder  |
| 380 | 60 | F | A | Bad    | Non pregnant |
| 381 | 60 | F | B | V.good | Lacting      |
| 382 | 61 | M | A | Good   | Non breeder  |
| 383 | 61 | M | A | Good   | Non breeder  |
| 384 | 61 | M | A | Medium | Non breeder  |
| 385 | 61 | M | A | Medium | Non breeder  |
| 386 | 61 | M | A | Medium | Non breeder  |
| 387 | 61 | M | A | Medium | Non breeder  |
| 388 | 61 | M | A | Medium | Non breeder  |
| 389 | 61 | M | A | Medium | Non breeder  |
| 390 | 61 | M | C | Bad    | Non breeder  |
| 391 | 61 | M | A | Bad    | Non breeder  |
| 392 | 62 | F | C | Bad    | Pregnant     |
| 393 | 62 | F | B | Good   | Lacting      |
| 394 | 62 | F | B | Medium | Lacting      |
| 395 | 62 | M | C | Medium | Breeder      |
| 396 | 62 | F | B | Medium | Lacting      |
| 397 | 62 | F | A | Good   | Non pregnant |
| 398 | 62 | M | C | Medium | Breeder      |
| 399 | 63 | F | C | Good   | Lacting      |
| 400 | 63 | M | A | Good   | Non breeder  |



|     |    |   |   |        |              |
|-----|----|---|---|--------|--------------|
| 401 | 63 | F | A | Bad    | Non pregnant |
| 402 | 63 | F | B | V.good | Pregnant     |
| 403 | 63 | F | B | Medium | Pregnant     |
| 404 | 63 | F | A | Medium | Pregnant     |
| 405 | 63 | M | A | Bad    | Non breeder  |
| 406 | 63 | M | C | Medium | Breeder      |
| 407 | 63 | F | A | Good   | Non pregnant |
| 408 | 63 | F | B | Bad    | Lacting      |
| 409 | 63 | M | B | Medium | Non breeder  |
| 410 | 63 | F | B | V.good | Lacting      |
| 411 | 63 | F | C | Bad    | Lacting      |
| 570 | 82 | F | B | Medium | Lacting      |
| 571 | 82 | F | B | Good   | Lacting      |
| 572 | 82 | F | B | Bad    | Lacting      |
| 573 | 82 | M | A | Good   | Non breeder  |
| 574 | 82 | M | A | Medium | Non breeder  |
| 575 | 82 | M | B | Bad    | Non breeder  |
| 576 | 83 | F | B | Good   | Pregnant     |
| 577 | 83 | F | B | Good   | Lacting      |
| 578 | 83 | M | A | Medium | Non breeder  |
| 579 | 83 | F | A | Medium | Non pregnant |
| 580 | 83 | F | A | Medium | Non pregnant |
| 581 | 84 | F | A | Medium | Lacting      |
| 582 | 84 | F | B | Medium | Pregnant     |
| 583 | 84 | F | B | Good   | Pregnant     |
| 584 | 84 | F | B | Good   | Lacting      |
| 585 | 84 | F | B | Medium | Lacting      |
| 586 | 85 | F | C | Good   | Lacting      |
| 587 | 85 | M | B | Good   | Breeder      |
| 588 | 85 | F | A | V.good | Pregnant     |
| 589 | 85 | F | B | V.good | Lacting      |
| 590 | 85 | F | A | Medium | Non pregnant |
| 591 | 85 | F | B | Good   | Lacting      |
| 592 | 86 | F | B | Good   | Lacting      |
| 593 | 86 | M | B | Good   | Breeder      |
| 594 | 86 | F | B | Medium | Lacting      |
| 595 | 86 | F | A | Medium | Pregnant     |
| 596 | 86 | F | A | Good   | Lacting      |
| 597 | 86 | M | A | Good   | Non breeder  |
| 598 | 87 | M | A | Medium | Non breeder  |
| 599 | 87 | F | A | Medium | Non pregnant |
| 600 | 87 | F | A | Medium | Non pregnant |
| 601 | 87 | M | A | Bad    | Non breeder  |
| 602 | 88 | M | A | Medium | Non breeder  |
| 603 | 88 | F | A | Good   | Pregnant     |
| 604 | 88 | M | A | Good   | Non breeder  |
| 605 | 88 | F | B | Good   | Lacting      |
| 606 | 88 | M | C | Medium | Breeder      |
| 607 | 88 | F | A | Good   | Pregnant     |
| 608 | 89 | F | A | Bad    | Lacting      |

|     |    |   |   |        |             |
|-----|----|---|---|--------|-------------|
| 609 | 89 | F | B | V.good | Lacting     |
| 610 | 89 | M | B | V.good | Breeder     |
| 611 | 89 | F | C | Good   | Pregnant    |
| 612 | 89 | F | C | Bad    | Lacting     |
| 613 | 89 | F | C | Good   | Lacting     |
| 614 | 89 | F | B | Good   | Pregnant    |
| 615 | 89 | F | B | Medium | Lacting     |
| 616 | 90 | F | C | V.good | Pregnant    |
| 617 | 90 | M | B | V.good | Breeder     |
| 618 | 90 | M | A | Medium | Non breeder |
| 619 | 90 | F | B | Good   | Lacting     |
| 620 | 90 | F | B | Good   | Lacting     |
| 621 | 90 | F | B | Good   | Lacting     |

M – Male; F – Female; A – Abortion; NA - No Abortion;

A- animals under 2 years of age; B - animals are 2-5 years old

C - animals over 5 years of age

Int – Intensive; Sint – Semi-intensive; Ex – Extensive; SE – Semi-extensiv

V.good; Very good

| Type of production | Management system | Herd size | Pasture | Pasture frequency |
|--------------------|-------------------|-----------|---------|-------------------|
| Mixed              | S.int             | (+31)     | Yes     | Sporadic          |
| Mixed              | S.int             | (+31)     | Yes     | Sporadic          |
| Mixed              | S.int             | (+31)     | Yes     | Sporadic          |
| Mixed              | S.int             | (+31)     | Yes     | Sporadic          |
| Mixed              | S.int             | (+31)     | Yes     | Sporadic          |
| Mixed              | S.int             | (+31)     | Yes     | Sporadic          |
| Mixed              | S.int             | (+31)     | Yes     | Sporadic          |
| Mixed              | S.int             | (+31)     | Yes     | Sporadic          |
| Mixed              | S.int             | (+31)     | Yes     | Sporadic          |
| Mixed              | S.int             | (+31)     | Yes     | Sporadic          |
| Mixed              | S.int             | (+31)     | Yes     | Sporadic          |
| Mixed              | S.int             | (+31)     | Yes     | Sporadic          |
| Milk               | S.int             | (1-10)    | Yes     | Seasonal          |
| Milk               | S.int             | (1-10)    | Yes     | Seasonal          |
| Milk               | S.int             | (1-10)    | Yes     | Seasonal          |
| Milk               | S.int             | (1-10)    | Yes     | Seasonal          |
| Milk               | S.int             | (1-10)    | Yes     | Seasonal          |
| Milk               | SE                | (11-30)   | Yes     | Seasonal          |
| Milk               | SE                | (11-30)   | Yes     | Seasonal          |
| Milk               | SE                | (11-30)   | Yes     | Seasonal          |
| Milk               | SE                | (11-30)   | Yes     | Seasonal          |
| Milk               | SE                | (11-30)   | Yes     | Seasonal          |
| Milk               | SE                | (11-30)   | Yes     | Seasonal          |
| Milk               | SE                | (11-30)   | Yes     | Seasonal          |
| Milk               | SE                | (11-30)   | Yes     | Seasonal          |
| Milk               | SE                | (11-30)   | Yes     | Seasonal          |
| Mixed              | SE                | (11-30)   | Yes     | Seasonal          |
| Mixed              | SE                | (11-30)   | Yes     | Seasonal          |
| Mixed              | SE                | (11-30)   | Yes     | Seasonal          |
| Mixed              | SE                | (11-30)   | Yes     | Seasonal          |
| Mixed              | SE                | (11-30)   | Yes     | Seasonal          |
| Mixed              | SE                | (11-30)   | Yes     | Seasonal          |
| Mixed              | SE                | (11-30)   | Yes     | Seasonal          |
| Meat               | Int               | (1-10)    | No      | Never             |
| Meat               | Int               | (1-10)    | No      | Never             |
| Meat               | Int               | (1-10)    | No      | Never             |
| Meat               | Int               | (1-10)    | No      | Never             |
| Milk               | S.int             | (11-30)   | Yes     | Seasonal          |
| Milk               | S.int             | (11-30)   | Yes     | Seasonal          |
| Milk               | S.int             | (11-30)   | Yes     | Seasonal          |
| Milk               | S.int             | (11-30)   | Yes     | Seasonal          |
| Milk               | S.int             | (11-30)   | Yes     | Seasonal          |
| Milk               | S.int             | (11-30)   | Yes     | Seasonal          |
| Milk               | S.int             | (11-30)   | Yes     | Seasonal          |
| Milk               | S.int             | (11-30)   | Yes     | Seasonal          |
| Milk               | S.int             | (11-30)   | Yes     | Seasonal          |
| Mixed              | S.int             | (11-30)   | Yes     | Sporadic          |
| Mixed              | S.int             | (11-30)   | Yes     | Sporadic          |

|       |       |         |     |          |
|-------|-------|---------|-----|----------|
| Mixed | S.int | (11-30) | Yes | Sporadic |
| Mixed | S.int | (11-30) | Yes | Sporadic |
| Mixed | S.int | (11-30) | Yes | Sporadic |
| Mixed | S.int | (11-30) | Yes | Sporadic |
| Mixed | S.int | (11-30) | Yes | Sporadic |
| Mixed | S.int | (11-30) | Yes | Sporadic |
| Mixed | S.int | (11-30) | Yes | Sporadic |
| Mixed | S.int | (11-30) | Yes | Sporadic |
| Mixed | SE    | (11-30) | Yes | Seasonal |
| Mixed | SE    | (11-30) | Yes | Seasonal |
| Mixed | SE    | (11-30) | Yes | Seasonal |
| Mixed | SE    | (11-30) | Yes | Seasonal |
| Mixed | SE    | (11-30) | Yes | Seasonal |
| Mixed | SE    | (11-30) | Yes | Seasonal |
| Mixed | SE    | (11-30) | Yes | Seasonal |
| Mixed | SE    | (11-30) | Yes | Seasonal |
| Mixed | SE    | (11-30) | Yes | Seasonal |
| Mixed | SE    | (11-30) | Yes | Seasonal |
| Mixed | SE    | (11-30) | Yes | Seasonal |
| Mixed | SE    | (11-30) | Yes | Seasonal |
| Meat  | SE    | (1-10)  | Yes | Seasonal |
| Meat  | SE    | (1-10)  | Yes | Seasonal |
| Meat  | SE    | (1-10)  | Yes | Seasonal |
| Meat  | SE    | (1-10)  | Yes | Seasonal |
| Meat  | SE    | (1-10)  | Yes | Seasonal |
| Mixed | S.int | (11-30) | Yes | Sporadic |
| Mixed | S.int | (11-30) | Yes | Sporadic |
| Mixed | S.int | (11-30) | Yes | Sporadic |
| Mixed | S.int | (11-30) | Yes | Sporadic |
| Mixed | S.int | (11-30) | Yes | Sporadic |
| Mixed | S.int | (11-30) | Yes | Sporadic |
| Mixed | S.int | (11-30) | Yes | Sporadic |
| Milk  | S.int | (1-10)  | Yes | Sporadic |
| Milk  | S.int | (1-10)  | Yes | Sporadic |
| Milk  | S.int | (1-10)  | Yes | Sporadic |
| Milk  | S.int | (1-10)  | Yes | Sporadic |
| Milk  | S.int | (1-10)  | Yes | Sporadic |
| Milk  | S.int | (1-10)  | Yes | Sporadic |
| Milk  | S.int | (1-10)  | Yes | Sporadic |
| Meat  | SE    | (1-10)  | Yes | Seasonal |
| Meat  | SE    | (1-10)  | Yes | Seasonal |
| Meat  | SE    | (1-10)  | Yes | Seasonal |
| Meat  | SE    | (1-10)  | Yes | Seasonal |
| Meat  | SE    | (1-10)  | Yes | Seasonal |
| Meat  | SE    | (1-10)  | Yes | Seasonal |
| Meat  | SE    | (1-10)  | Yes | Seasonal |
| Meat  | SE    | (1-10)  | Yes | Seasonal |
| Milk  | SE    | (1-10)  | Yes | Seasonal |
| Milk  | SE    | (1-10)  | Yes | Seasonal |
| Milk  | SE    | (1-10)  | Yes | Seasonal |

|       |       |         |     |          |
|-------|-------|---------|-----|----------|
| Mixed | S.int | (11-30) | Yes | Sporadic |
| Mixed | S.int | (11-30) | Yes | Sporadic |
| Mixed | S.int | (11-30) | Yes | Sporadic |
| Mixed | S.int | (11-30) | Yes | Sporadic |
| Mixed | S.int | (11-30) | Yes | Sporadic |
| Mixed | S.int | (11-30) | Yes | Sporadic |
| Mixed | S.int | (11-30) | Yes | Sporadic |
| Mixed | S.int | (11-30) | Yes | Sporadic |
| Milk  | S.int | (1-10)  | Yes | Sporadic |
| Milk  | S.int | (1-10)  | Yes | Sporadic |
| Milk  | S.int | (1-10)  | Yes | Sporadic |
| Milk  | S.int | (1-10)  | Yes | Sporadic |
| Milk  | S.int | (1-10)  | Yes | Sporadic |
| Mixed | S.int | (1-10)  | Yes | Seasonal |
| Mixed | S.int | (1-10)  | Yes | Seasonal |
| Mixed | S.int | (1-10)  | Yes | Seasonal |
| Mixed | S.int | (1-10)  | Yes | Seasonal |
| Mixed | S.int | (1-10)  | Yes | Seasonal |
| Milk  | S.int | (1-10)  | Yes | Sporadic |
| Milk  | S.int | (1-10)  | Yes | Sporadic |
| Milk  | S.int | (1-10)  | Yes | Sporadic |
| Milk  | S.int | (1-10)  | Yes | Sporadic |
| Milk  | S.int | (1-10)  | Yes | Sporadic |
| Milk  | Int   | (1-10)  | No  | Never    |
| Milk  | Int   | (1-10)  | No  | Never    |
| Milk  | Int   | (1-10)  | No  | Never    |
| Milk  | Int   | (1-10)  | No  | Never    |
| Milk  | Int   | (1-10)  | No  | Never    |
| Milk  | Int   | (1-10)  | No  | Never    |
| Meat  | SE    | (1-10)  | Yes | Seasonal |
| Meat  | SE    | (1-10)  | Yes | Seasonal |
| Meat  | SE    | (1-10)  | Yes | Seasonal |
| Meat  | SE    | (1-10)  | Yes | Seasonal |
| Meat  | SE    | (1-10)  | Yes | Seasonal |
| Milk  | S.int | (1-10)  | Yes | Sporadic |
| Milk  | S.int | (1-10)  | Yes | Sporadic |
| Milk  | S.int | (1-10)  | Yes | Sporadic |
| Milk  | S.int | (1-10)  | Yes | Sporadic |
| Milk  | S.int | (1-10)  | Yes | Sporadic |
| Milk  | S.int | (1-10)  | Yes | Sporadic |
| Meat  | S.int | (11-30) | Yes | Sporadic |
| Meat  | S.int | (11-30) | Yes | Sporadic |
| Meat  | S.int | (11-30) | Yes | Sporadic |
| Meat  | S.int | (11-30) | Yes | Sporadic |
| Meat  | S.int | (11-30) | Yes | Sporadic |
| Milk  | S.int | (1-10)  | Yes | Seasonal |
| Milk  | S.int | (1-10)  | Yes | Seasonal |
| Milk  | S.int | (1-10)  | Yes | Seasonal |
| Milk  | S.int | (1-10)  | Yes | Seasonal |
| Milk  | S.int | (1-10)  | Yes | Seasonal |

|       |       |         |     |          |
|-------|-------|---------|-----|----------|
| Milk  | S.int | (1-10)  | Yes | Seasonal |
| Milk  | S.int | (1-10)  | Yes | Seasonal |
| Meat  | SE    | (1-10)  | Yes | Seasonal |
| Meat  | SE    | (1-10)  | Yes | Seasonal |
| Meat  | SE    | (1-10)  | Yes | Seasonal |
| Meat  | SE    | (1-10)  | Yes | Seasonal |
| Milk  | S.int | (1-10)  | Yes | Sporadic |
| Milk  | S.int | (1-10)  | Yes | Sporadic |
| Milk  | S.int | (1-10)  | Yes | Sporadic |
| Milk  | S.int | (1-10)  | Yes | Sporadic |
| Milk  | SE    | (1-10)  | Yes | Seasonal |
| Milk  | SE    | (1-10)  | Yes | Seasonal |
| Milk  | SE    | (1-10)  | Yes | Seasonal |
| Milk  | SE    | (1-10)  | Yes | Seasonal |
| Mixed | S.int | (11-30) | Yes | Sporadic |
| Mixed | S.int | (11-30) | Yes | Sporadic |
| Mixed | S.int | (11-30) | Yes | Sporadic |
| Mixed | S.int | (11-30) | Yes | Sporadic |
| Mixed | S.int | (11-30) | Yes | Sporadic |
| Mixed | S.int | (11-30) | Yes | Sporadic |
| Mixed | S.int | (11-30) | Yes | Sporadic |
| Mixed | S.int | (11-30) | Yes | Sporadic |
| Mixed | S.int | (11-30) | Yes | Sporadic |
| Meat  | S.int | (11-30) | Yes | Sporadic |
| Meat  | S.int | (11-30) | Yes | Sporadic |
| Meat  | S.int | (11-30) | Yes | Sporadic |
| Meat  | S.int | (11-30) | Yes | Sporadic |
| Meat  | S.int | (11-30) | Yes | Sporadic |
| Meat  | S.int | (11-30) | Yes | Sporadic |
| Meat  | S.int | (11-30) | Yes | Sporadic |
| Milk  | SE    | (1-10)  | Yes | Seasonal |
| Milk  | SE    | (1-10)  | Yes | Seasonal |
| Milk  | SE    | (1-10)  | Yes | Seasonal |
| Milk  | SE    | (1-10)  | Yes | Seasonal |
| Milk  | SE    | (1-10)  | Yes | Seasonal |
| Mixed | SE    | (11-30) | Yes | Seasonal |
| Mixed | SE    | (11-30) | Yes | Seasonal |
| Mixed | SE    | (11-30) | Yes | Seasonal |
| Mixed | SE    | (11-30) | Yes | Seasonal |
| Mixed | SE    | (11-30) | Yes | Seasonal |
| Mixed | SE    | (11-30) | Yes | Seasonal |
| Milk  | S.int | (1-10)  | Yes | Sporadic |
| Milk  | S.int | (1-10)  | Yes | Sporadic |
| Milk  | S.int | (1-10)  | Yes | Sporadic |
| Milk  | S.int | (1-10)  | Yes | Sporadic |
| Milk  | S.int | (1-10)  | Yes | Sporadic |
| Meat  | SE    | (11-30) | Yes | Sporadic |
| Meat  | SE    | (11-30) | Yes | Sporadic |
| Meat  | SE    | (11-30) | Yes | Sporadic |
| Meat  | SE    | (11-30) | Yes | Sporadic |
| Mixed | S.int | (11-30) | Yes | Seasonal |

|       |       |         |     |          |
|-------|-------|---------|-----|----------|
| Mixed | S.int | (11-30) | Yes | Seasonal |
| Mixed | S.int | (11-30) | Yes | Seasonal |
| Mixed | S.int | (11-30) | Yes | Seasonal |
| Mixed | S.int | (11-30) | Yes | Seasonal |
| Mixed | S.int | (11-30) | Yes | Seasonal |
| Mixed | S.int | (11-30) | Yes | Seasonal |
| Mixed | S.int | (11-30) | Yes | Seasonal |
| Mixed | S.int | (11-30) | Yes | Seasonal |
| Milk  | S.int | (11-30) | Yes | Seasonal |
| Milk  | S.int | (11-30) | Yes | Seasonal |
| Milk  | S.int | (11-30) | Yes | Seasonal |
| Milk  | S.int | (11-30) | Yes | Seasonal |
| Milk  | S.int | (11-30) | Yes | Seasonal |
| Milk  | S.int | (11-30) | Yes | Seasonal |
| Milk  | S.int | (11-30) | Yes | Seasonal |
| Mixed | SE    | (1-10)  | Yes | Seasonal |
| Mixed | SE    | (1-10)  | Yes | Seasonal |
| Mixed | SE    | (1-10)  | Yes | Seasonal |
| Mixed | SE    | (1-10)  | Yes | Seasonal |
| Mixed | SE    | (1-10)  | Yes | Seasonal |
| Mixed | SE    | (1-10)  | Yes | Seasonal |
| Milk  | S.int | (1-10)  | Yes | Sporadic |
| Milk  | S.int | (1-10)  | Yes | Sporadic |
| Milk  | S.int | (1-10)  | Yes | Sporadic |
| Milk  | S.int | (1-10)  | Yes | Sporadic |
| Milk  | S.int | (1-10)  | Yes | Sporadic |
| Milk  | S.int | (1-10)  | Yes | Sporadic |
| Milk  | S.int | (1-10)  | Yes | Sporadic |
| Mixed | S.int | (11-30) | Yes | Sporadic |
| Mixed | S.int | (11-30) | Yes | Sporadic |
| Mixed | S.int | (11-30) | Yes | Sporadic |
| Mixed | S.int | (11-30) | Yes | Sporadic |
| Mixed | S.int | (11-30) | Yes | Sporadic |
| Mixed | S.int | (11-30) | Yes | Sporadic |
| Meat  | SE    | (11-30) | Yes | Seasonal |
| Meat  | SE    | (11-30) | Yes | Seasonal |
| Meat  | SE    | (11-30) | Yes | Seasonal |
| Meat  | SE    | (11-30) | Yes | Seasonal |
| Meat  | SE    | (11-30) | Yes | Seasonal |
| Meat  | SE    | (11-30) | Yes | Seasonal |
| Mixed | S.int | (1-10)  | Yes | Sporadic |
| Mixed | S.int | (1-10)  | Yes | Sporadic |
| Mixed | S.int | (1-10)  | Yes | Sporadic |
| Mixed | S.int | (1-10)  | Yes | Sporadic |
| Mixed | SE    | (11-30) | Yes | Seasonal |
| Mixed | SE    | (11-30) | Yes | Seasonal |
| Mixed | SE    | (11-30) | Yes | Seasonal |
| Mixed | SE    | (11-30) | Yes | Seasonal |
| Mixed | SE    | (11-30) | Yes | Seasonal |
| Milk  | Int   | (11-30) | No  | Never    |

|       |       |         |     |          |
|-------|-------|---------|-----|----------|
| Milk  | Int   | (11-30) | No  | Never    |
| Milk  | Int   | (11-30) | No  | Never    |
| Milk  | Int   | (11-30) | No  | Never    |
| Milk  | Int   | (11-30) | No  | Never    |
| Milk  | Int   | (11-30) | No  | Never    |
| Milk  | Int   | (11-30) | No  | Never    |
| Mixed | S.int | (1-10)  | Yes | Seasonal |
| Mixed | S.int | (1-10)  | Yes | Seasonal |
| Mixed | S.int | (1-10)  | Yes | Seasonal |
| Mixed | S.int | (1-10)  | Yes | Seasonal |
| Mixed | S.int | (1-10)  | Yes | Seasonal |
| Mixed | S.int | (1-10)  | Yes | Seasonal |
| Mixed | S.int | (1-10)  | Yes | Seasonal |
| Mixed | S.int | (11-30) | Yes | Sporadic |
| Mixed | S.int | (11-30) | Yes | Sporadic |
| Mixed | S.int | (11-30) | Yes | Sporadic |
| Mixed | S.int | (11-30) | Yes | Sporadic |
| Mixed | S.int | (11-30) | Yes | Sporadic |
| Mixed | S.int | (11-30) | Yes | Sporadic |
| Mixed | S.int | (11-30) | Yes | Sporadic |
| Mixed | S.int | (11-30) | Yes | Sporadic |
| Mixed | SE    | (1-10)  | Yes | Frequent |
| Mixed | SE    | (1-10)  | Yes | Frequent |
| Mixed | SE    | (1-10)  | Yes | Frequent |
| Mixed | SE    | (1-10)  | Yes | Frequent |
| Mixed | SE    | (1-10)  | Yes | Frequent |
| Mixed | SE    | (1-10)  | Yes | Frequent |
| Mixed | SE    | (1-10)  | Yes | Frequent |
| Mixed | SE    | (1-10)  | Yes | Seasonal |
| Mixed | SE    | (1-10)  | Yes | Seasonal |
| Mixed | SE    | (1-10)  | Yes | Seasonal |
| Mixed | SE    | (1-10)  | Yes | Seasonal |
| Mixed | SE    | (1-10)  | Yes | Seasonal |
| Mixed | S.int | (11-30) | Yes | Sporadic |
| Mixed | S.int | (11-30) | Yes | Sporadic |
| Mixed | S.int | (11-30) | Yes | Sporadic |
| Mixed | S.int | (11-30) | Yes | Sporadic |
| Mixed | S.int | (11-30) | Yes | Sporadic |
| Mixed | S.int | (11-30) | Yes | Sporadic |
| Mixed | S.int | (11-30) | Yes | Sporadic |
| Mixed | S.int | (11-30) | Yes | Sporadic |
| Mixed | S.int | (11-30) | Yes | Sporadic |
| Meat  | S.int | (11-30) | Yes | Seasonal |
| Meat  | S.int | (11-30) | Yes | Seasonal |
| Meat  | S.int | (11-30) | Yes | Seasonal |
| Meat  | S.int | (11-30) | Yes | Seasonal |
| Meat  | S.int | (11-30) | Yes | Seasonal |



|       |       |         |     |          |
|-------|-------|---------|-----|----------|
| Milk  | SE    | (1-10)  | Yes | Seasonal |
| Milk  | SE    | (1-10)  | Yes | Seasonal |
| Milk  | SE    | (1-10)  | Yes | Seasonal |
| Milk  | SE    | (1-10)  | Yes | Seasonal |
| Milk  | SE    | (1-10)  | Yes | Seasonal |
| Milk  | SE    | (1-10)  | Yes | Seasonal |
| Milk  | S.int | (1-10)  | Yes | Sporadic |
| Milk  | S.int | (1-10)  | Yes | Sporadic |
| Milk  | S.int | (1-10)  | Yes | Sporadic |
| Milk  | S.int | (1-10)  | Yes | Sporadic |
| Milk  | S.int | (1-10)  | Yes | Sporadic |
| Milk  | S.int | (1-10)  | Yes | Sporadic |
| Milk  | S.int | (1-10)  | Yes | Sporadic |
| Mixed | S.int | (1-10)  | Yes | Seasonal |
| Mixed | S.int | (1-10)  | Yes | Seasonal |
| Mixed | S.int | (1-10)  | Yes | Seasonal |
| Mixed | S.int | (1-10)  | Yes | Seasonal |
| Mixed | S.int | (1-10)  | Yes | Seasonal |
| Milk  | S.int | (1-10)  | Yes | Sporadic |
| Milk  | S.int | (1-10)  | Yes | Sporadic |
| Milk  | S.int | (1-10)  | Yes | Sporadic |
| Milk  | SE    | (1-10)  | Yes | Seasonal |
| Milk  | SE    | (1-10)  | Yes | Seasonal |
| Milk  | SE    | (1-10)  | Yes | Seasonal |
| Milk  | SE    | (1-10)  | Yes | Seasonal |
| Milk  | SE    | (1-10)  | Yes | Seasonal |
| Milk  | SE    | (1-10)  | Yes | Seasonal |
| Milk  | S.int | (11-30) | Yes | Seasonal |
| Milk  | S.int | (11-30) | Yes | Seasonal |
| Milk  | S.int | (11-30) | Yes | Seasonal |
| Milk  | S.int | (11-30) | Yes | Seasonal |
| Milk  | S.int | (11-30) | Yes | Seasonal |
| Milk  | S.int | (11-30) | Yes | Seasonal |
| Milk  | S.int | (11-30) | Yes | Seasonal |
| Mixed | SE    | (11-30) | Yes | Seasonal |
| Mixed | SE    | (11-30) | Yes | Seasonal |
| Mixed | SE    | (11-30) | Yes | Seasonal |
| Mixed | SE    | (11-30) | Yes | Seasonal |
| Mixed | SE    | (11-30) | Yes | Seasonal |
| Mixed | SE    | (11-30) | Yes | Seasonal |
| Mixed | SE    | (11-30) | Yes | Seasonal |
| Milk  | S.int | (1-10)  | Yes | Seasonal |
| Milk  | S.int | (1-10)  | Yes | Seasonal |
| Milk  | S.int | (1-10)  | Yes | Seasonal |
| Milk  | S.int | (1-10)  | Yes | Seasonal |
| Milk  | SE    | (1-10)  | Yes | Frequent |
| Milk  | SE    | (1-10)  | Yes | Frequent |
| Milk  | SE    | (1-10)  | Yes | Frequent |
| Milk  | SE    | (1-10)  | Yes | Frequent |
| Meat  | S.int | (1-10)  | Yes | Sporadic |

|       |       |         |     |          |
|-------|-------|---------|-----|----------|
| Meat  | S.int | (1-10)  | Yes | Sporadic |
| Meat  | S.int | (1-10)  | Yes | Sporadic |
| Meat  | S.int | (1-10)  | Yes | Sporadic |
| Meat  | S.int | (1-10)  | Yes | Sporadic |
| Milk  | SE    | (11-30) | Yes | Seasonal |
| Milk  | SE    | (11-30) | Yes | Seasonal |
| Milk  | SE    | (11-30) | Yes | Seasonal |
| Milk  | SE    | (11-30) | Yes | Seasonal |
| Milk  | SE    | (11-30) | Yes | Seasonal |
| Milk  | SE    | (11-30) | Yes | Seasonal |
| Mixed | S.int | (11-30) | Yes | Sporadic |
| Mixed | S.int | (11-30) | Yes | Sporadic |
| Mixed | S.int | (11-30) | Yes | Sporadic |
| Mixed | S.int | (11-30) | Yes | Sporadic |
| Mixed | S.int | (11-30) | Yes | Sporadic |
| Mixed | S.int | (11-30) | Yes | Sporadic |
| Mixed | S.int | (+31)   | Yes | Seasonal |
| Mixed | S.int | (+31)   | Yes | Seasonal |
| Mixed | S.int | (+31)   | Yes | Seasonal |
| Mixed | S.int | (+31)   | Yes | Seasonal |
| Mixed | S.int | (+31)   | Yes | Seasonal |
| Mixed | S.int | (+31)   | Yes | Seasonal |
| Mixed | S.int | (+31)   | Yes | Seasonal |
| Milk  | SE    | (11-30) | Yes | Seasonal |
| Milk  | SE    | (11-30) | Yes | Seasonal |
| Milk  | SE    | (11-30) | Yes | Seasonal |
| Milk  | SE    | (11-30) | Yes | Seasonal |
| Milk  | SE    | (11-30) | Yes | Seasonal |
| Milk  | SE    | (11-30) | Yes | Seasonal |
| Milk  | SE    | (11-30) | Yes | Seasonal |
| Milk  | SE    | (11-30) | Yes | Seasonal |
| Meat  | Int   | (11-30) | No  | Never    |
| Meat  | Int   | (11-30) | No  | Never    |
| Meat  | Int   | (11-30) | No  | Never    |
| Meat  | Int   | (11-30) | No  | Never    |
| Meat  | Int   | (11-30) | No  | Never    |
| Meat  | Int   | (11-30) | No  | Never    |
| Meat  | Int   | (11-30) | No  | Never    |
| Meat  | Int   | (11-30) | No  | Never    |
| Meat  | Int   | (11-30) | No  | Never    |
| Mixed | Ex    | (11-30) | Yes | Frequent |
| Mixed | Ex    | (11-30) | Yes | Frequent |
| Mixed | Ex    | (1-10)  | Yes | Frequent |
| Mixed | Ex    | (1-10)  | Yes | Frequent |
| Mixed | Ex    | (1-10)  | Yes | Frequent |
| Mixed | Ex    | (11-30) | Yes | Frequent |
| Mixed | Ex    | (11-30) | Yes | Frequent |
| Mixed | Ex    | (11-30) | Yes | Frequent |

|       |       |         |     |          |
|-------|-------|---------|-----|----------|
| Mixed | Ex    | (11-30) | Yes | Frequent |
| Mixed | Ex    | (11-30) | Yes | Frequent |
| Mixed | Ex    | (11-30) | Yes | Frequent |
| Mixed | Ex    | (11-30) | Yes | Frequent |
| Mixed | Ex    | (11-30) | Yes | Frequent |
| Mixed | Ex    | (11-30) | Yes | Frequent |
| Mixed | Ex    | (11-30) | Yes | Frequent |
| Mixed | Ex    | (11-30) | Yes | Frequent |
| Mixed | Ex    | (11-30) | Yes | Frequent |
| Mixed | Ex    | (11-30) | Yes | Frequent |
| Mixed | Ex    | (11-30) | Yes | Frequent |
| Mixed | Ex    | (11-30) | Yes | Frequent |
| Mixed | S.int | (1-10)  | Yes | Seasonal |
| Mixed | S.int | (1-10)  | Yes | Seasonal |
| Mixed | S.int | (1-10)  | Yes | Seasonal |
| Mixed | S.int | (1-10)  | Yes | Seasonal |
| Mixed | S.int | (1-10)  | Yes | Seasonal |
| Mixed | S.int | (1-10)  | Yes | Seasonal |
| Mixed | S.int | (1-10)  | Yes | Seasonal |
| Mixed | S.int | (1-10)  | Yes | Frequent |
| Mixed | S.int | (1-10)  | Yes | Frequent |
| Mixed | S.int | (1-10)  | Yes | Frequent |
| Mixed | S.int | (1-10)  | Yes | Frequent |
| Mixed | S.int | (1-10)  | Yes | Frequent |
| Mixed | S.int | (1-10)  | Yes | Frequent |
| Milk  | SE    | (1-10)  | Yes | Seasonal |
| Milk  | SE    | (1-10)  | Yes | Seasonal |
| Milk  | SE    | (1-10)  | Yes | Seasonal |
| Milk  | SE    | (1-10)  | Yes | Seasonal |
| Milk  | SE    | (1-10)  | Yes | Seasonal |
| Milk  | S.int | (11-30) | Yes | Seasonal |
| Milk  | S.int | (11-30) | Yes | Seasonal |
| Milk  | S.int | (11-30) | Yes | Seasonal |
| Milk  | S.int | (11-30) | Yes | Seasonal |
| Milk  | S.int | (11-30) | Yes | Seasonal |
| Milk  | S.int | (11-30) | Yes | Seasonal |
| Mixed | SE    | (11-30) | Yes | Frequent |
| Mixed | SE    | (11-30) | Yes | Frequent |
| Mixed | SE    | (11-30) | Yes | Frequent |
| Mixed | SE    | (11-30) | Yes | Frequent |
| Mixed | SE    | (11-30) | Yes | Frequent |
| Mixed | SE    | (11-30) | Yes | Frequent |
| Mixed | Ex    | (1-10)  | Yes | Frequent |
| Mixed | Ex    | (1-10)  | Yes | Frequent |
| Mixed | Ex    | (1-10)  | Yes | Frequent |
| Mixed | Ex    | (1-10)  | Yes | Frequent |
| Mixed | S.int | (1-10)  | Yes | Seasonal |
| Mixed | S.int | (1-10)  | Yes | Seasonal |
| Mixed | S.int | (1-10)  | Yes | Seasonal |
| Mixed | S.int | (1-10)  | Yes | Seasonal |
| Mixed | S.int | (1-10)  | Yes | Seasonal |
| Milk  | S.int | (1-10)  | Yes | Seasonal |

[illegible]

| Type of pasture area | Size of pasture area | Common pastures | Transhumance |
|----------------------|----------------------|-----------------|--------------|
| Hill                 | from11 to 50H        | No              | No           |
| Hill                 | from11 to 50H        | No              | No           |
| Hill                 | from11 to 50H        | No              | No           |
| Hill                 | from11 to 50H        | No              | No           |
| Hill                 | from11 to 50H        | No              | No           |
| Hill                 | from11 to 50H        | No              | No           |
| Hill                 | from11 to 50H        | No              | No           |
| Hill                 | from11 to 50H        | No              | No           |
| Hill                 | from11 to 50H        | No              | No           |
| Hill                 | from11 to 50H        | No              | No           |
| Hill                 | from11 to 50H        | No              | No           |
| Hill                 | 10H                  | Yes             | No           |
| Hill                 | 10H                  | Yes             | No           |
| Hill                 | 10H                  | Yes             | No           |
| Hill                 | 10H                  | Yes             | No           |
| Hill                 | 10H                  | Yes             | No           |
| Plain                | from11 to 50H        | Yes             | No           |
| Plain                | from11 to 50H        | Yes             | No           |
| Plain                | from11 to 50H        | Yes             | No           |
| Plain                | from11 to 50H        | Yes             | No           |
| Plain                | from11 to 50H        | Yes             | No           |
| Plain                | from11 to 50H        | Yes             | No           |
| Plain                | from11 to 50H        | Yes             | No           |
| Plain                | from11 to 50H        | Yes             | No           |
| Hill                 | 10H                  | Yes             | No           |
| Hill                 | 10H                  | Yes             | No           |
| Hill                 | 10H                  | Yes             | No           |
| Hill                 | 10H                  | Yes             | No           |
| Hill                 | 10H                  | Yes             | No           |
| Hill                 | 10H                  | Yes             | No           |
| Hill                 | 10H                  | Yes             | No           |
|                      |                      |                 | No           |
| Hill                 | from11 to 50H        | Yes             | No           |
| Hill                 | from11 to 50H        | Yes             | No           |
| Hill                 | from11 to 50H        | Yes             | No           |
| Hill                 | from11 to 50H        | Yes             | No           |
| Hill                 | from11 to 50H        | Yes             | No           |
| Hill                 | from11 to 50H        | Yes             | No           |
| Hill                 | from11 to 50H        | Yes             | No           |
| Hill                 | from11 to 50H        | Yes             | No           |
| Hill                 | from11 to 50H        | Yes             | No           |
| Plain                | 10H                  | No              | No           |
| Plain                | 10H                  | No              | No           |

|       |               |     |    |
|-------|---------------|-----|----|
| Plain | 10H           | No  | No |
| Plain | 10H           | No  | No |
| Plain | 10H           | No  | No |
| Plain | 10H           | No  | No |
| Plain | 10H           | No  | No |
| Plain | 10H           | No  | No |
| Plain | 10H           | No  | No |
| Plain | 10H           | No  | No |
| Plain | from11 to 50H | Yes | No |
| Plain | from11 to 50H | Yes | No |
| Plain | from11 to 50H | Yes | No |
| Plain | from11 to 50H | Yes | No |
| Plain | from11 to 50H | Yes | No |
| Plain | from11 to 50H | Yes | No |
| Plain | from11 to 50H | Yes | No |
| Plain | from11 to 50H | Yes | No |
| Plain | from11 to 50H | Yes | No |
| Plain | from11 to 50H | Yes | No |
| Hill  | 10H           | No  | No |
| Hill  | 10H           | No  | No |
| Hill  | 10H           | No  | No |
| Hill  | 10H           | No  | No |
| Hill  | 10H           | No  | No |
| Hill  | 10H           | No  | No |
| Hill  | 10H           | No  | No |
| Hill  | 10H           | No  | No |
| Hill  | 10H           | No  | No |
| Hill  | 10H           | No  | No |
| Hill  | 10H           | No  | No |
| Hill  | 10H           | No  | No |
| Hill  | 10H           | No  | No |
| Plain | 10H           | Yes | No |
| Plain | 10H           | Yes | No |
| Plain | 10H           | Yes | No |
| Plain | 10H           | Yes | No |
| Plain | 10H           | Yes | No |
| Plain | 10H           | Yes | No |
| Plain | 10H           | Yes | No |
| Plain | 10H           | Yes | No |
| Hill  | from11 to 50H | Yes | No |
| Hill  | from11 to 50H | Yes | No |
| Hill  | from11 to 50H | Yes | No |
| Hill  | from11 to 50H | Yes | No |
| Hill  | from11 to 50H | Yes | No |
| Hill  | from11 to 50H | Yes | No |
| Hill  | from11 to 50H | Yes | No |
| Hill  | from11 to 50H | Yes | No |
| Plain | 10H           | No  | No |
| Plain | 10H           | No  | No |
| Plain | 10H           | No  | No |

|       |               |     |    |
|-------|---------------|-----|----|
| Plain | 10H           | No  | No |
| Plain | 10H           | No  | No |
| Plain | 10H           | No  | No |
| Plain | 10H           | No  | No |
| Plain | 10H           | No  | No |
| Plain | 10H           | No  | No |
| Plain | 10H           | No  | No |
| Plain | 10H           | No  | No |
| Hill  | 10H           | Yes | No |
| Hill  | 10H           | Yes | No |
| Hill  | 10H           | Yes | No |
| Hill  | 10H           | Yes | No |
| Hill  | 10H           | Yes | No |
| Plain | from11 to 50H | Yes | No |
| Plain | from11 to 50H | Yes | No |
| Plain | from11 to 50H | Yes | No |
| Plain | from11 to 50H | Yes | No |
| Plain | from11 to 50H | Yes | No |
| Hill  | 10H           | No  | No |
| Hill  | 10H           | No  | No |
| Hill  | 10H           | No  | No |
| Hill  | 10H           | No  | No |
| Hill  | 10H           | No  | No |
|       |               |     | No |
| Hill  | 10H           | Yes | No |
| Hill  | 10H           | Yes | No |
| Hill  | 10H           | Yes | No |
| Hill  | 10H           | Yes | No |
| Hill  | 10H           | Yes | No |
| Plain | 10H           | Yes | No |
| Plain | 10H           | Yes | No |
| Plain | 10H           | Yes | No |
| Plain | 10H           | Yes | No |
| Plain | 10H           | Yes | No |
| Plain | 10H           | Yes | No |
| Plain | from11 to 50H | Yes | No |
| Plain | from11 to 50H | Yes | No |
| Plain | from11 to 50H | Yes | No |
| Plain | from11 to 50H | Yes | No |
| Plain | from11 to 50H | Yes | No |
| Hill  | 10H           | No  | No |
| Hill  | 10H           | No  | No |
| Hill  | 10H           | No  | No |
| Hill  | 10H           | No  | No |
| Hill  | 10H           | No  | No |

|       |               |     |     |
|-------|---------------|-----|-----|
| Hill  | 10H           | No  | No  |
| Hill  | 10H           | No  | No  |
| Hill  | 10H           | No  | No  |
| Hill  | 10H           | No  | No  |
| Hill  | 10H           | No  | No  |
| Hill  | 10H           | No  | No  |
| Plain | from11 to 50H | Yes | No  |
| Plain | from11 to 50H | Yes | No  |
| Plain | from11 to 50H | Yes | No  |
| Plain | from11 to 50H | Yes | No  |
| Plain | from11 to 50H | No  | No  |
| Plain | from11 to 50H | No  | No  |
| Plain | from11 to 50H | No  | No  |
| Plain | from11 to 50H | No  | No  |
| Hill  | from11 to 50H | Yes | No  |
| Hill  | from11 to 50H | Yes | No  |
| Hill  | from11 to 50H | Yes | No  |
| Hill  | from11 to 50H | Yes | No  |
| Hill  | from11 to 50H | Yes | No  |
| Hill  | from11 to 50H | Yes | No  |
| Hill  | from11 to 50H | Yes | No  |
| Hill  | from11 to 50H | Yes | No  |
| Plain | 10H           | No  | No  |
| Plain | 10H           | No  | No  |
| Plain | 10H           | No  | No  |
| Plain | 10H           | No  | No  |
| Plain | 10H           | No  | No  |
| Plain | 10H           | No  | No  |
| Hill  | from11 to 50H | Yes | No  |
| Hill  | from11 to 50H | Yes | No  |
| Hill  | from11 to 50H | Yes | No  |
| Hill  | from11 to 50H | Yes | No  |
| Hill  | from11 to 50H | Yes | No  |
| Plain | from11 to 50H | Yes | Yes |
| Plain | from11 to 50H | Yes | Yes |
| Plain | from11 to 50H | Yes | Yes |
| Plain | from11 to 50H | Yes | Yes |
| Plain | from11 to 50H | Yes | Yes |
| Plain | from11 to 50H | Yes | Yes |
| Hill  | 10H           | No  | No  |
| Hill  | 10H           | No  | No  |
| Hill  | 10H           | No  | No  |
| Hill  | 10H           | No  | No  |
| Hill  | 10H           | No  | No  |
| Hill  | from11 to 50H | No  | No  |
| Hill  | from11 to 50H | No  | No  |
| Hill  | from11 to 50H | No  | No  |
| Hill  | from11 to 50H | No  | No  |
| Plain | from11 to 50H | Yes | No  |



|          |               |     |     |
|----------|---------------|-----|-----|
| Plain    | from11 to 50H | Yes | No  |
| Plain    | from11 to 50H | Yes | No  |
| Plain    | from11 to 50H | Yes | No  |
| Plain    | from11 to 50H | Yes | No  |
| Plain    | from11 to 50H | Yes | No  |
| Plain    | from11 to 50H | Yes | No  |
| Plain    | from11 to 50H | Yes | No  |
| Plain    | from11 to 50H | Yes | No  |
| Hill     | 10H           | No  | No  |
| Hill     | 10H           | No  | No  |
| Hill     | 10H           | No  | No  |
| Hill     | 10H           | No  | No  |
| Hill     | 10H           | No  | No  |
| Hill     | 10H           | No  | No  |
| Hill     | 10H           | No  | No  |
| Mountain | plus50H       | Yes | Yes |
| Mountain | plus50H       | Yes | Yes |
| Mountain | plus50H       | Yes | Yes |
| Mountain | plus50H       | Yes | Yes |
| Mountain | plus50H       | Yes | Yes |
| Mountain | plus50H       | Yes | Yes |
| Hill     | from11 to 50H | No  | No  |
| Hill     | from11 to 50H | No  | No  |
| Hill     | from11 to 50H | No  | No  |
| Hill     | from11 to 50H | No  | No  |
| Hill     | from11 to 50H | No  | No  |
| Hill     | from11 to 50H | No  | No  |
| Hill     | from11 to 50H | No  | No  |
| Hill     | from11 to 50H | Yes | No  |
| Hill     | from11 to 50H | Yes | No  |
| Hill     | from11 to 50H | Yes | No  |
| Hill     | from11 to 50H | Yes | No  |
| Hill     | from11 to 50H | Yes | No  |
| Hill     | from11 to 50H | Yes | No  |
| Plain    | 10H           | No  | No  |
| Plain    | 10H           | No  | No  |
| Plain    | 10H           | No  | No  |
| Plain    | 10H           | No  | No  |
| Plain    | 10H           | No  | No  |
| Plain    | 10H           | No  | No  |
| Hill     | 10H           | Yes | No  |
| Hill     | 10H           | Yes | No  |
| Hill     | 10H           | Yes | No  |
| Hill     | 10H           | Yes | No  |
| Plain    | from11 to 50H | Yes | No  |
| Plain    | from11 to 50H | Yes | No  |
| Plain    | from11 to 50H | Yes | No  |
| Plain    | from11 to 50H | Yes | No  |
| Plain    | from11 to 50H | Yes | No  |
|          |               |     | No  |

[illegible]

|       |               |     |    |
|-------|---------------|-----|----|
| Hill  | from11 to 50H | Yes | No |
| Hill  | from11 to 50H | Yes | No |
| Hill  | from11 to 50H | Yes | No |
| Hill  | from11 to 50H | Yes | No |
| Hill  | from11 to 50H | Yes | No |
| Hill  | from11 to 50H | Yes | No |
| Hill  | 10H           | Yes | No |
| Hill  | 10H           | Yes | No |
| Hill  | 10H           | Yes | No |
| Hill  | 10H           | Yes | No |
| Hill  | 10H           | Yes | No |
| Hill  | 10H           | Yes | No |
| Hill  | 10H           | Yes | No |
| Plain | from11 to 50H | Yes | No |
| Plain | from11 to 50H | Yes | No |
| Plain | from11 to 50H | Yes | No |
| Plain | from11 to 50H | Yes | No |
| Plain | from11 to 50H | Yes | No |
| Hill  | 10H           | Yes | No |
| Hill  | 10H           | Yes | No |
| Hill  | 10H           | Yes | No |
| Plain | from11 to 50H | Yes | No |
| Plain | from11 to 50H | Yes | No |
| Plain | from11 to 50H | Yes | No |
| Plain | from11 to 50H | Yes | No |
| Plain | from11 to 50H | Yes | No |
| Plain | from11 to 50H | Yes | No |
| Hill  | from11 to 50H | Yes | No |
| Hill  | from11 to 50H | Yes | No |
| Hill  | from11 to 50H | Yes | No |
| Hill  | from11 to 50H | Yes | No |
| Hill  | from11 to 50H | Yes | No |
| Hill  | from11 to 50H | Yes | No |
| Plain | 10H           | No  | No |
| Plain | 10H           | No  | No |
| Plain | 10H           | No  | No |
| Plain | 10H           | No  | No |
| Plain | 10H           | No  | No |
| Plain | 10H           | No  | No |
| Plain | 10H           | No  | No |
| Hill  | 10H           | No  | No |
| Hill  | 10H           | No  | No |
| Hill  | 10H           | No  | No |
| Hill  | 10H           | No  | No |
| Plain | from11 to 50H | Yes | No |
| Plain | from11 to 50H | Yes | No |
| Plain | from11 to 50H | Yes | No |
| Plain | from11 to 50H | Yes | No |
| Hill  | 10H           | No  | No |

|          |               |     |    |
|----------|---------------|-----|----|
| Hill     | 10H           | No  | No |
| Hill     | 10H           | No  | No |
| Hill     | 10H           | No  | No |
| Hill     | 10H           | No  | No |
| Hill     | from11 to 50H | No  | No |
| Hill     | from11 to 50H | No  | No |
| Hill     | from11 to 50H | No  | No |
| Hill     | from11 to 50H | No  | No |
| Hill     | from11 to 50H | No  | No |
| Hill     | from11 to 50H | No  | No |
| Hill     | 10H           | No  | No |
| Hill     | 10H           | No  | No |
| Hill     | 10H           | No  | No |
| Hill     | 10H           | No  | No |
| Hill     | 10H           | No  | No |
| Hill     | from11 to 50H | No  | No |
| Hill     | from11 to 50H | No  | No |
| Hill     | from11 to 50H | No  | No |
| Hill     | from11 to 50H | No  | No |
| Hill     | from11 to 50H | No  | No |
| Hill     | from11 to 50H | No  | No |
| Hill     | from11 to 50H | No  | No |
| Plain    | 10H           | No  | No |
| Plain    | 10H           | No  | No |
| Plain    | 10H           | No  | No |
| Plain    | 10H           | No  | No |
| Plain    | 10H           | No  | No |
| Plain    | 10H           | No  | No |
| Plain    | 10H           | No  | No |
| Plain    | 10H           | No  | No |
|          |               |     | No |
| Hill     | from11 to 50H | Yes | No |
| Hill     | from11 to 50H | Yes | No |
| Hill     | from11 to 50H | Yes | No |
| Hill     | from11 to 50H | Yes | No |
| Hill     | from11 to 50H | Yes | No |
| Hill     | from11 to 50H | Yes | No |
| Hill     | from11 to 50H | Yes | No |
| Mountain | from11 to 50H | Yes | No |
| Mountain | from11 to 50H | Yes | No |

[illegible]

[illegible]

| Use of concentrate feed | Watering type | Water source | Presence of water source in pasture |
|-------------------------|---------------|--------------|-------------------------------------|
| Yes                     | Surface       | Tap          | No                                  |
| Yes                     | Surface       | Tap          | No                                  |
| Yes                     | Surface       | Tap          | No                                  |
| Yes                     | Surface       | Tap          | No                                  |
| Yes                     | Surface       | Tap          | No                                  |
| Yes                     | Surface       | Tap          | No                                  |
| Yes                     | Surface       | Tap          | No                                  |
| Yes                     | Surface       | Tap          | No                                  |
| Yes                     | Surface       | Tap          | No                                  |
| Yes                     | Surface       | Tap          | No                                  |
| Yes                     | Surface       | Tap          | No                                  |
| Yes                     | Surface       | Tap          | No                                  |
| Yes                     | Surface       | Tap          | Yes                                 |
| Yes                     | Surface       | Tap          | Yes                                 |
| Yes                     | Surface       | Tap          | Yes                                 |
| Yes                     | Surface       | Tap          | Yes                                 |
| Yes                     | Surface       | Tap          | Yes                                 |
| Yes                     | Surface       | Tap          | Yes                                 |
| Yes                     | Surface       | Tap          | Yes                                 |
| Yes                     | Surface       | Tap          | Yes                                 |
| Yes                     | Surface       | Tap          | Yes                                 |
| Yes                     | Surface       | Tap          | Yes                                 |
| Yes                     | Surface       | Tap          | Yes                                 |
| Yes                     | Surface       | Tap          | Yes                                 |
| Yes                     | Surface       | Tap          | Yes                                 |
| Yes                     | Surface       | Tap          | No                                  |
| Yes                     | Surface       | Tap          | No                                  |
| Yes                     | Surface       | Tap          | No                                  |
| Yes                     | Surface       | Tap          | No                                  |
| Yes                     | Surface       | Tap          | No                                  |
| Yes                     | Surface       | Tap          | No                                  |
| Yes                     | Surface       | Tap          | No                                  |
| Yes                     | Surface       | Tap          | No                                  |
| Yes                     | Surface       | Tap          | No                                  |
| Yes                     | Surface       | Tap          | No                                  |
| Yes                     | Surface       | Tap          | No                                  |
| Yes                     | Mixed         | Tap+Well     | Yes                                 |
| Yes                     | Mixed         | Tap+Well     | Yes                                 |
| Yes                     | Mixed         | Tap+Well     | Yes                                 |
| Yes                     | Mixed         | Tap+Well     | Yes                                 |
| Yes                     | Mixed         | Tap+Well     | Yes                                 |
| Yes                     | Mixed         | Tap+Well     | Yes                                 |
| Yes                     | Mixed         | Tap+Well     | Yes                                 |
| Yes                     | Mixed         | Tap+Well     | Yes                                 |
| Yes                     | Mixed         | Tap+Well     | Yes                                 |
| Yes                     | Mixed         | Tap+Well     | Yes                                 |
| No                      | Surface       | Tap          | No                                  |
| No                      | Surface       | Tap          | No                                  |

|     |         |            |     |
|-----|---------|------------|-----|
| No  | Surface | Tap        | No  |
| No  | Surface | Tap        | No  |
| No  | Surface | Tap        | No  |
| No  | Surface | Tap        | No  |
| No  | Surface | Tap        | No  |
| No  | Surface | Tap        | No  |
| No  | Surface | Tap        | No  |
| No  | Surface | Tap        | No  |
| Yes | Mixed   | Tap+Well   | No  |
| Yes | Mixed   | Tap+Well   | No  |
| Yes | Mixed   | Tap+Well   | No  |
| Yes | Mixed   | Tap+Well   | No  |
| Yes | Mixed   | Tap+Well   | No  |
| Yes | Mixed   | Tap+Well   | No  |
| Yes | Mixed   | Tap+Well   | No  |
| Yes | Mixed   | Tap+Well   | No  |
| Yes | Mixed   | Tap+Well   | No  |
| Yes | Mixed   | Tap+Well   | No  |
| Yes | Mixed   | Tap+Well   | No  |
| Yes | Mixed   | Tap+Well   | No  |
| No  | Surface | Tap        | No  |
| No  | Surface | Tap        | No  |
| No  | Surface | Tap        | No  |
| No  | Surface | Tap        | No  |
| No  | Surface | Tap        | No  |
| Yes | Mixed   | Tap+Well   | No  |
| Yes | Mixed   | Tap+Well   | No  |
| Yes | Mixed   | Tap+Well   | No  |
| Yes | Mixed   | Tap+Well   | No  |
| Yes | Mixed   | Tap+Well   | No  |
| Yes | Mixed   | Tap+Well   | No  |
| Yes | Mixed   | Tap+Well   | No  |
| Yes | Mixed   | Tap+Well   | No  |
| Yes | Mixed   | Tap+Well   | No  |
| Yes | Surface | Tap        | No  |
| Yes | Surface | Tap        | No  |
| Yes | Surface | Tap        | No  |
| Yes | Surface | Tap        | No  |
| Yes | Surface | Tap        | No  |
| Yes | Surface | Tap        | No  |
| Yes | Surface | Tap        | No  |
| Yes | Surface | Tap        | No  |
| Yes | Surface | Tap        | No  |
| No  | Mixed   | Tap+Well   | Yes |
| No  | Mixed   | Tap+Well   | Yes |
| No  | Mixed   | Tap+Well   | Yes |
| No  | Mixed   | Tap+Well   | Yes |
| No  | Mixed   | Tap+Well   | Yes |
| No  | Mixed   | Tap+Well   | Yes |
| No  | Mixed   | Tap+Well   | Yes |
| No  | Mixed   | Tap+Well   | Yes |
| Yes | Surface | Tap+Valley | Yes |
| Yes | Surface | Tap+Valley | Yes |
| Yes | Surface | Tap+Valley | Yes |



|     |         |            |     |
|-----|---------|------------|-----|
| No  | Mixed   | Tap+Valley | Yes |
| No  | Mixed   | Tap+Valley | Yes |
| No  | Mixed   | Tap+Valley | Yes |
| No  | Mixed   | Tap+Valley | Yes |
| No  | Mixed   | Tap+Valley | Yes |
| No  | Mixed   | Tap+Valley | Yes |
| No  | Mixed   | Tap+Valley | Yes |
| No  | Mixed   | Tap+Valley | Yes |
| Yes | Surface | Tap        | No  |
| Yes | Surface | Tap        | No  |
| Yes | Surface | Tap        | No  |
| Yes | Surface | Tap        | No  |
| Yes | Surface | Tap        | No  |
| Yes | Surface | Tap        | Yes |
| Yes | Surface | Tap        | Yes |
| Yes | Surface | Tap        | Yes |
| Yes | Surface | Tap        | Yes |
| Yes | Surface | Tap        | Yes |
| No  | Surface | Tap+Valley | No  |
| No  | Surface | Tap+Valley | No  |
| No  | Surface | Tap+Valley | No  |
| No  | Surface | Tap+Valley | No  |
| No  | Surface | Tap+Valley | No  |
| Yes | Surface | Tap        |     |
| No  | Mixed   | Tap+Valley | No  |
| No  | Mixed   | Tap+Valley | No  |
| No  | Mixed   | Tap+Valley | No  |
| No  | Mixed   | Tap+Valley | No  |
| No  | Mixed   | Tap+Valley | No  |
| Yes | Mixed   | Tap+Valley | No  |
| Yes | Mixed   | Tap+Valley | No  |
| Yes | Mixed   | Tap+Valley | No  |
| Yes | Mixed   | Tap+Valley | No  |
| Yes | Mixed   | Tap+Valley | No  |
| Yes | Mixed   | Tap+Valley | No  |
| Yes | Surface | Tap        | Yes |
| Yes | Surface | Tap        | Yes |
| Yes | Surface | Tap        | Yes |
| Yes | Surface | Tap        | Yes |
| Yes | Surface | Tap        | Yes |
| Yes | Surface | Tap        | No  |
| Yes | Surface | Tap        | No  |
| Yes | Surface | Tap        | No  |
| Yes | Surface | Tap        | No  |

|     |         |            |     |
|-----|---------|------------|-----|
| Yes | Surface | Tap        | No  |
| Yes | Surface | Tap        | No  |
| Yes | Mixed   | Tap+Well   | No  |
| Yes | Mixed   | Tap+Well   | No  |
| Yes | Mixed   | Tap+Well   | No  |
| Yes | Mixed   | Tap+Well   | No  |
| No  | Surface | Tap        | No  |
| No  | Surface | Tap        | No  |
| No  | Surface | Tap        | No  |
| No  | Surface | Tap        | No  |
| No  | Surface | Tap        | No  |
| No  | Surface | Tap        | No  |
| No  | Surface | Tap        | No  |
| No  | Surface | Tap        | No  |
| Yes | Mixed   | Tap+Well   | No  |
| Yes | Mixed   | Tap+Well   | No  |
| Yes | Mixed   | Tap+Well   | No  |
| Yes | Mixed   | Tap+Well   | No  |
| Yes | Mixed   | Tap+Well   | No  |
| Yes | Mixed   | Tap+Well   | No  |
| Yes | Mixed   | Tap+Well   | No  |
| Yes | Mixed   | Tap+Well   | No  |
| Yes | Mixed   | Tap+Well   | No  |
| No  | Surface | Tap        | No  |
| No  | Surface | Tap        | No  |
| No  | Surface | Tap        | No  |
| No  | Surface | Tap        | No  |
| No  | Surface | Tap        | No  |
| No  | Surface | Tap        | No  |
| Yes | Mixed   | Tap+Well   | Yes |
| Yes | Mixed   | Tap+Well   | Yes |
| Yes | Mixed   | Tap+Well   | Yes |
| Yes | Mixed   | Tap+Well   | Yes |
| Yes | Mixed   | Tap+Well   | Yes |
| Yes | Mixed   | Tap+Well   | No  |
| Yes | Mixed   | Tap+Well   | No  |
| Yes | Mixed   | Tap+Well   | No  |
| Yes | Mixed   | Tap+Well   | No  |
| Yes | Mixed   | Tap+Well   | No  |
| Yes | Mixed   | Tap+Well   | No  |
| Yes | Surface | Tap        | No  |
| Yes | Surface | Tap        | No  |
| Yes | Surface | Tap        | No  |
| Yes | Surface | Tap        | No  |
| Yes | Surface | Tap        | No  |
| No  | Surface | Tap        | No  |
| No  | Surface | Tap        | No  |
| No  | Surface | Tap        | No  |
| No  | Surface | Tap        | No  |
| Yes | Mixed   | Tap+Valley | Yes |

|     |         |            |     |
|-----|---------|------------|-----|
| Yes | Mixed   | Tap+Valley | Yes |
| Yes | Mixed   | Tap+Valley | Yes |
| Yes | Mixed   | Tap+Valley | Yes |
| Yes | Mixed   | Tap+Valley | Yes |
| Yes | Mixed   | Tap+Valley | Yes |
| Yes | Mixed   | Tap+Valley | Yes |
| Yes | Mixed   | Tap+Valley | Yes |
| Yes | Mixed   | Tap+Valley | Yes |
| No  | Surface | Tap        | Yes |
| No  | Surface | Tap        | Yes |
| No  | Surface | Tap        | Yes |
| No  | Surface | Tap        | Yes |
| No  | Surface | Tap        | Yes |
| No  | Surface | Tap        | No  |
| No  | Surface | Tap        | No  |
| No  | Mixed   | Tap+Valley | Yes |
| No  | Mixed   | Tap+Valley | Yes |
| No  | Mixed   | Tap+Valley | Yes |
| No  | Mixed   | Tap+Valley | Yes |
| No  | Mixed   | Tap+Valley | Yes |
| No  | Mixed   | Tap+Valley | Yes |
| No  | Mixed   | Tap+Valley | Yes |
| Yes | Surface | Tap        | Yes |
| Yes | Surface | Tap        | Yes |
| Yes | Surface | Tap        | Yes |
| Yes | Surface | Tap        | Yes |
| Yes | Surface | Tap        | Yes |
| Yes | Surface | Tap        | Yes |
| No  | Mixed   | Tap+Well   | Yes |
| No  | Mixed   | Tap+Well   | Yes |
| No  | Mixed   | Tap+Well   | Yes |
| No  | Mixed   | Tap+Well   | Yes |
| No  | Mixed   | Tap+Well   | Yes |
| No  | Mixed   | Tap+Well   | Yes |
| No  | Surface | Tap        | No  |
| No  | Surface | Tap        | No  |
| No  | Surface | Tap        | No  |
| No  | Surface | Tap        | No  |
| No  | Surface | Tap        | No  |
| No  | Surface | Tap        | No  |
| Yes | Surface | Tap+Well   | No  |
| Yes | Surface | Tap+Well   | No  |
| Yes | Surface | Tap+Well   | No  |
| Yes | Surface | Tap+Well   | No  |
| Yes | Surface | Tap+Valley | No  |
| Yes | Surface | Tap+Valley | No  |
| Yes | Surface | Tap+Valley | No  |
| Yes | Surface | Tap+Valley | No  |
| Yes | Surface | Tap        |     |

[illegible]

|     |         |            |     |
|-----|---------|------------|-----|
| Yes | Surface | Tap+Valley | Yes |
| Yes | Surface | Tap+Valley | Yes |
| Yes | Surface | Tap+Valley | Yes |
| Yes | Surface | Tap+Valley | Yes |
| Yes | Surface | Tap+Valley | Yes |
| Yes | Surface | Tap+Valley | Yes |
| Yes | Surface | Tap+Valley | Yes |
| Yes | Surface | Tap+Valley | Yes |
| Yes | Surface | Tap+Valley | Yes |
| Yes | Surface | Tap+Valley | Yes |
| Yes | Surface | Tap+Valley | Yes |
| Yes | Surface | Tap+Valley | Yes |
| Yes | Surface | Tap+Valley | Yes |
| No  | Surface | Tap        | No  |
| No  | Surface | Tap        | No  |
| No  | Surface | Tap        | No  |
| No  | Surface | Tap        | No  |
| No  | Surface | Tap        | No  |
| No  | Surface | Tap+Valley | No  |
| No  | Surface | Tap+Valley | No  |
| No  | Surface | Tap+Valley | No  |
| Yes | Mixed   | Tap+Well   | Yes |
| Yes | Mixed   | Tap+Well   | Yes |
| Yes | Mixed   | Tap+Well   | Yes |
| Yes | Mixed   | Tap+Well   | Yes |
| Yes | Mixed   | Tap+Well   | Yes |
| Yes | Surface | Tap        | No  |
| Yes | Surface | Tap        | No  |
| Yes | Surface | Tap        | No  |
| Yes | Surface | Tap        | No  |
| Yes | Surface | Tap        | No  |
| Yes | Surface | Tap        | No  |
| No  | Mixed   | Tap+Well   | No  |
| No  | Mixed   | Tap+Well   | No  |
| No  | Mixed   | Tap+Well   | No  |
| No  | Mixed   | Tap+Well   | No  |
| No  | Mixed   | Tap+Well   | No  |
| No  | Mixed   | Tap+Well   | No  |
| No  | Mixed   | Tap+Well   | No  |
| Yes | Surface | Tap+Valley | No  |
| Yes | Surface | Tap+Valley | No  |
| Yes | Surface | Tap+Valley | No  |
| Yes | Surface | Tap        | No  |
| Yes | Surface | Tap        | No  |
| Yes | Surface | Tap        | No  |
| Yes | Surface | Tap        | No  |
| Yes | Mixed   | Tap+Well   | No  |

|     |         |          |     |
|-----|---------|----------|-----|
| Yes | Mixed   | Tap+Well | No  |
| Yes | Mixed   | Tap+Well | No  |
| Yes | Mixed   | Tap+Well | No  |
| Yes | Mixed   | Tap+Well | No  |
| No  | Surface | Tap      | No  |
| No  | Surface | Tap      | No  |
| No  | Surface | Tap      | No  |
| No  | Surface | Tap      | No  |
| No  | Surface | Tap      | No  |
| No  | Surface | Tap      | No  |
| Yes | Surface | Tap      | No  |
| Yes | Surface | Tap      | No  |
| Yes | Surface | Tap      | No  |
| Yes | Surface | Tap      | No  |
| Yes | Surface | Tap      | No  |
| Yes | Surface | Tap      | No  |
| Yes | Surface | Tap      | No  |
| Yes | Surface | Tap      | No  |
| Yes | Surface | Tap      | No  |
| Yes | Surface | Tap      | No  |
| Yes | Surface | Tap      | No  |
| Yes | Surface | Tap      | No  |
| Yes | Surface | Tap      | No  |
| Yes | Mixed   | Tap+Well | Yes |
| Yes | Mixed   | Tap+Well | Yes |
| Yes | Mixed   | Tap+Well | Yes |
| Yes | Mixed   | Tap+Well | Yes |
| Yes | Mixed   | Tap+Well | Yes |
| Yes | Mixed   | Tap+Well | Yes |
| Yes | Mixed   | Tap+Well | Yes |
| Yes | Mixed   | Tap+Well | Yes |
| Yes | Surface | Tap      |     |
| No  | Surface | Tap      | No  |
| No  | Surface | Tap      | No  |
| No  | Surface | Tap      | No  |
| No  | Surface | Tap      | No  |
| No  | Surface | Tap      | No  |
| No  | Surface | Tap      | No  |
| No  | Surface | Tap      | No  |
| Yes | Mixed   | Tap+Well | No  |
| Yes | Mixed   | Tap+Well | No  |

[illegible]

[illegible]



| Location of the water trough | Species on the farm | Presence of other farm animals |
|------------------------------|---------------------|--------------------------------|
| Interior                     | goat                | Yes                            |
| Interior                     | goat+sheep          | Yes                            |
| Interior                     | goat                | Yes                            |
| Exterior                     | goat+sheep          | Yes                            |
| Interior                     | goat                | Yes                            |
| Interior                     | goat+sheep          | Yes                            |
| Interior                     | goat+sheep          | Yes                            |

[illegible]

|                   |            |     |
|-------------------|------------|-----|
| Interior+Exterior | goat+sheep | Yes |
| Interior          | goat       | Yes |
| Interior          | goat+sheep | Yes |
| Interior          | goat       | Yes |
| Interior+Exterior | goat+sheep | Yes |
| Interior+Exterior | goat       | Yes |
| Interior          | goat+sheep | Yes |
| Interior          | goat       | Yes |

[illegible]

|                   |            |     |
|-------------------|------------|-----|
| Interior+Exterior | goat+sheep | Yes |
| Interior          | goat       | Yes |
| Exterior          | goat       | Yes |
| Exterior          | goat       | Yes |
| Exterior          | goat+sheep | Yes |
| Interior+Exterior | goat       | Yes |
| Interior          | goat+sheep | Yes |
| Interior+Exterior | goat       | Yes |
| Interior          | goat       | Yes |

[illegible]

[illegible]

[illegible]



[illegible]

[illegible]

Presence of  
cattle

Presence of equids

Presence of poultry

Presence of rodents

|     |    |     |     |
|-----|----|-----|-----|
| No  | No | No  | Yes |
| No  | No | No  | Yes |
| No  | No | No  | Yes |
| No  | No | No  | Yes |
| No  | No | No  | Yes |
| No  | No | No  | Yes |
| No  | No | No  | Yes |
| No  | No | No  | Yes |
| No  | No | No  | Yes |
| No  | No | No  | Yes |
| No  | No | No  | Yes |
| No  | No | No  | Yes |
| No  | No | No  | No  |
| No  | No | No  | No  |
| No  | No | No  | No  |
| No  | No | No  | No  |
| No  | No | No  | No  |
| No  | No | Yes | No  |
| No  | No | Yes | No  |
| No  | No | Yes | No  |
| No  | No | Yes | No  |
| No  | No | Yes | No  |
| No  | No | Yes | No  |
| No  | No | Yes | No  |
| No  | No | Yes | No  |
| No  | No | Yes | No  |
| No  | No | Yes | No  |
| No  | No | Yes | No  |
| No  | No | Yes | No  |
| No  | No | Yes | No  |
| No  | No | Yes | No  |
| No  | No | No  | No  |
| No  | No | No  | No  |
| No  | No | No  | No  |
| No  | No | No  | No  |
| Yes | No | No  | Yes |
| Yes | No | No  | Yes |
| Yes | No | No  | Yes |
| Yes | No | No  | Yes |
| Yes | No | No  | Yes |
| Yes | No | No  | Yes |
| Yes | No | No  | Yes |
| Yes | No | No  | Yes |
| Yes | No | No  | Yes |
| No  | No | No  | Yes |
| No  | No | No  | Yes |

|     |     |     |     |
|-----|-----|-----|-----|
| No  | No  | No  | Yes |
| No  | No  | No  | Yes |
| No  | No  | No  | Yes |
| No  | No  | No  | Yes |
| No  | No  | No  | Yes |
| No  | No  | No  | Yes |
| No  | No  | No  | Yes |
| No  | No  | No  | Yes |
| Yes | Yes | Yes | Yes |
| Yes | Yes | Yes | Yes |
| Yes | Yes | Yes | Yes |
| Yes | Yes | Yes | Yes |
| Yes | Yes | Yes | Yes |
| Yes | Yes | Yes | Yes |
| Yes | Yes | Yes | Yes |
| Yes | Yes | Yes | Yes |
| Yes | Yes | Yes | Yes |
| Yes | Yes | Yes | Yes |
| Yes | Yes | Yes | Yes |
| Yes | Yes | Yes | Yes |
| No  | No  | Yes | No  |
| No  | No  | Yes | No  |
| No  | No  | Yes | No  |
| No  | No  | Yes | No  |
| No  | No  | Yes | No  |
| No  | No  | Yes | Yes |
| No  | No  | Yes | Yes |
| No  | No  | Yes | Yes |
| No  | No  | Yes | Yes |
| No  | No  | Yes | Yes |
| No  | No  | Yes | Yes |
| No  | No  | Yes | Yes |
| No  | No  | Yes | Yes |
| No  | No  | Yes | Yes |
| Yes | No  | Yes | No  |
| Yes | No  | Yes | No  |
| Yes | No  | Yes | No  |
| Yes | No  | Yes | No  |
| Yes | No  | Yes | No  |
| Yes | No  | Yes | No  |
| Yes | No  | Yes | No  |
| Yes | No  | Yes | Yes |
| Yes | No  | Yes | Yes |
| Yes | No  | Yes | Yes |
| Yes | No  | Yes | Yes |
| Yes | No  | Yes | Yes |
| Yes | No  | Yes | Yes |
| Yes | No  | Yes | Yes |
| Yes | No  | Yes | Yes |
| No  | No  | No  | No  |
| No  | No  | No  | No  |
| No  | No  | No  | No  |

|     |    |     |     |
|-----|----|-----|-----|
| Yes | No | Yes | No  |
| Yes | No | Yes | No  |
| Yes | No | Yes | No  |
| Yes | No | Yes | No  |
| Yes | No | Yes | No  |
| Yes | No | Yes | No  |
| Yes | No | Yes | No  |
| Yes | No | Yes | No  |
| No  | No | No  | Yes |
| No  | No | No  | Yes |
| No  | No | No  | Yes |
| No  | No | No  | Yes |
| No  | No | No  | Yes |
| No  | No | Yes | No  |
| No  | No | Yes | No  |
| No  | No | Yes | No  |
| No  | No | Yes | No  |
| Yes | No | No  | No  |
| Yes | No | No  | No  |
| Yes | No | No  | No  |
| Yes | No | No  | No  |
| No  | No | No  | Yes |
| No  | No | No  | Yes |
| No  | No | No  | Yes |
| No  | No | No  | Yes |
| No  | No | No  | Yes |
| No  | No | No  | Yes |
| Yes | No | Yes | No  |
| Yes | No | Yes | No  |
| Yes | No | Yes | No  |
| Yes | No | Yes | No  |
| No  | No | No  | No  |
| No  | No | No  | No  |
| No  | No | No  | No  |
| No  | No | No  | No  |
| No  | No | No  | No  |
| No  | No | No  | No  |
| No  | No | No  | No  |
| No  | No | No  | No  |
| No  | No | No  | No  |
| No  | No | No  | No  |
| No  | No | No  | No  |
| No  | No | No  | No  |
| No  | No | No  | No  |
| Yes | No | No  | Yes |
| Yes | No | No  | Yes |
| Yes | No | No  | Yes |
| Yes | No | No  | Yes |
| Yes | No | No  | Yes |

[illegible]

|     |     |     |     |
|-----|-----|-----|-----|
| No  | Yes | Yes | No  |
| No  | Yes | Yes | No  |
| No  | Yes | Yes | No  |
| No  | Yes | Yes | No  |
| No  | Yes | Yes | No  |
| No  | Yes | Yes | No  |
| No  | Yes | Yes | No  |
| No  | Yes | Yes | No  |
| No  | No  | No  | No  |
| No  | No  | No  | No  |
| No  | No  | No  | No  |
| No  | No  | No  | No  |
| No  | No  | No  | No  |
| No  | No  | No  | No  |
| No  | No  | No  | No  |
| Yes | Yes | Yes | No  |
| Yes | Yes | Yes | No  |
| Yes | Yes | Yes | No  |
| Yes | Yes | Yes | No  |
| Yes | Yes | Yes | No  |
| Yes | Yes | No  | No  |
| No  | No  | No  | Yes |
| No  | No  | No  | Yes |
| No  | No  | No  | Yes |
| No  | No  | No  | Yes |
| No  | No  | No  | Yes |
| No  | No  | No  | Yes |
| Yes | No  | No  | Yes |
| Yes | No  | No  | Yes |
| Yes | No  | No  | Yes |
| Yes | No  | No  | Yes |
| Yes | No  | No  | Yes |
| No  | No  | Yes | No  |
| No  | No  | Yes | No  |
| No  | No  | Yes | No  |
| No  | No  | Yes | No  |
| No  | No  | Yes | No  |
| No  | No  | Yes | No  |
| No  | No  | Yes | No  |
| No  | No  | Yes | No  |
| No  | No  | Yes | No  |
| No  | Yes | Yes | No  |
| No  | Yes | Yes | No  |
| No  | Yes | Yes | No  |
| No  | Yes | Yes | No  |
| No  | Yes | Yes | No  |
| Yes | No  | No  | Yes |

|     |     |     |     |
|-----|-----|-----|-----|
| Yes | No  | No  | Yes |
| Yes | No  | No  | Yes |
| Yes | No  | No  | Yes |
| Yes | No  | No  | Yes |
| Yes | No  | No  | Yes |
| Yes | No  | No  | Yes |
| Yes | Yes | No  | No  |
| Yes | Yes | No  | No  |
| Yes | Yes | No  | No  |
| Yes | Yes | No  | No  |
| Yes | Yes | No  | No  |
| Yes | Yes | No  | No  |
| No  | No  | No  | No  |
| No  | No  | No  | No  |
| No  | No  | No  | No  |
| No  | No  | No  | No  |
| No  | No  | No  | No  |
| No  | No  | No  | No  |
| No  | No  | No  | No  |
| No  | No  | No  | No  |
| No  | No  | No  | No  |
| Yes | No  | Yes | No  |
| Yes | No  | Yes | No  |
| Yes | No  | Yes | No  |
| Yes | No  | Yes | No  |
| Yes | No  | Yes | No  |
| Yes | No  | Yes | No  |
| Yes | No  | Yes | No  |
| No  | No  | Yes | No  |
| No  | No  | Yes | No  |
| No  | No  | Yes | No  |
| No  | No  | Yes | No  |
| No  | No  | Yes | No  |
| Yes | No  | No  | No  |
| Yes | No  | No  | No  |
| Yes | No  | No  | No  |
| Yes | No  | No  | No  |
| Yes | No  | No  | No  |
| Yes | No  | No  | No  |
| Yes | No  | No  | No  |
| Yes | No  | No  | No  |
| No  | No  | No  | Yes |
| No  | No  | No  | Yes |
| No  | No  | No  | Yes |
| No  | No  | No  | Yes |
| No  | No  | No  | Yes |



[illegible]

[illegible]

|     |    |     |     |
|-----|----|-----|-----|
| Yes | No | No  | No  |
| Yes | No | No  | No  |
| Yes | No | No  | No  |
| Yes | No | No  | No  |
| Yes | No | No  | No  |
| Yes | No | No  | No  |
| Yes | No | No  | No  |
| Yes | No | No  | No  |
| Yes | No | No  | No  |
| Yes | No | No  | No  |
| Yes | No | No  | No  |
| Yes | No | No  | No  |
| Yes | No | Yes | No  |
| Yes | No | Yes | No  |
| Yes | No | Yes | No  |
| Yes | No | Yes | No  |
| Yes | No | Yes | No  |
| No  | No | Yes | No  |
| No  | No | Yes | No  |
| No  | No | Yes | No  |
| No  | No | Yes | No  |
| No  | No | Yes | No  |
| Yes | No | Yes | Yes |
| Yes | No | Yes | Yes |
| Yes | No | Yes | Yes |
| Yes | No | Yes | Yes |
| Yes | No | Yes | Yes |
| Yes | No | No  | No  |
| Yes | No | No  | No  |
| Yes | No | No  | No  |
| Yes | No | No  | No  |
| Yes | No | No  | No  |
| Yes | No | No  | No  |
| No  | No | No  | No  |
| No  | No | No  | No  |
| No  | No | No  | No  |
| No  | No | No  | No  |
| No  | No | No  | No  |
| No  | No | No  | No  |
| No  | No | Yes | No  |
| No  | No | Yes | No  |
| No  | No | Yes | No  |
| Yes | No | No  | No  |
| Yes | No | No  | No  |
| Yes | No | No  | No  |
| Yes | No | No  | No  |
| Yes | No | No  | No  |
| Yes | No | No  | No  |
| Yes | No | No  | No  |
| No  | No | No  | No  |

[illegible]

| Presence of dogs | Presence of cats | Number of cats | Access of cats to feed |
|------------------|------------------|----------------|------------------------|
| Yes              | Yes              | (3-4)          | No                     |
| Yes              | Yes              | (3-4)          | No                     |
| Yes              | Yes              | (3-4)          | No                     |
| Yes              | Yes              | (3-4)          | No                     |
| Yes              | Yes              | (3-4)          | No                     |
| Yes              | Yes              | (3-4)          | No                     |
| Yes              | Yes              | (3-4)          | No                     |
| Yes              | Yes              | (3-4)          | No                     |
| Yes              | Yes              | (3-4)          | No                     |
| Yes              | Yes              | (3-4)          | No                     |
| Yes              | Yes              | (3-4)          | No                     |
| Yes              | Yes              | (3-4)          | No                     |
| Yes              | Yes              | (1-2)          | Yes                    |
| Yes              | Yes              | (1-2)          | Yes                    |
| Yes              | Yes              | (1-2)          | Yes                    |
| Yes              | Yes              | (1-2)          | Yes                    |
| Yes              | Yes              | (1-2)          | Yes                    |
| Yes              | No               | 0              | No                     |
| Yes              | No               | 0              | No                     |
| Yes              | No               | 0              | No                     |
| Yes              | No               | 0              | No                     |
| Yes              | No               | 0              | No                     |
| Yes              | No               | 0              | No                     |
| Yes              | No               | 0              | No                     |
| Yes              | No               | 0              | No                     |
| Yes              | Yes              | (1-2)          | Yes                    |
| Yes              | Yes              | (1-2)          | Yes                    |
| Yes              | Yes              | (1-2)          | Yes                    |
| Yes              | Yes              | (1-2)          | Yes                    |
| Yes              | Yes              | (1-2)          | Yes                    |
| Yes              | Yes              | (1-2)          | Yes                    |
| Yes              | Yes              | (1-2)          | Yes                    |
| Yes              | Yes              | (1-2)          | Yes                    |
| Yes              | Yes              | (1-2)          | Yes                    |
| Yes              | Yes              | (1-2)          | Yes                    |
| Yes              | Yes              | (3-4)          | Yes                    |
| Yes              | Yes              | (3-4)          | Yes                    |
| Yes              | Yes              | (3-4)          | Yes                    |
| Yes              | Yes              | (3-4)          | Yes                    |
| Yes              | Yes              | (3-4)          | Yes                    |
| Yes              | Yes              | (3-4)          | Yes                    |
| Yes              | Yes              | (3-4)          | Yes                    |
| Yes              | Yes              | (3-4)          | Yes                    |
| Yes              | Yes              | (3-4)          | Yes                    |
| No               | Yes              | (1-2)          | Yes                    |
| No               | Yes              | (1-2)          | Yes                    |

|     |     |       |     |
|-----|-----|-------|-----|
| No  | Yes | (1-2) | Yes |
| No  | Yes | (1-2) | Yes |
| No  | Yes | (1-2) | Yes |
| No  | Yes | (1-2) | Yes |
| No  | Yes | (1-2) | Yes |
| No  | Yes | (1-2) | Yes |
| No  | Yes | (1-2) | Yes |
| No  | Yes | (1-2) | Yes |
| Yes | No  | 0     | No  |
| Yes | No  | 0     | No  |
| Yes | No  | 0     | No  |
| Yes | No  | 0     | No  |
| Yes | No  | 0     | No  |
| Yes | No  | 0     | No  |
| Yes | No  | 0     | No  |
| Yes | No  | 0     | No  |
| Yes | No  | 0     | No  |
| Yes | No  | 0     | No  |
| Yes | No  | 0     | No  |
| Yes | No  | 0     | No  |
| Yes | No  | 0     | No  |
| Yes | No  | 0     | No  |
| Yes | No  | 0     | No  |
| No  | Yes | (3-4) | Yes |
| No  | Yes | (3-4) | Yes |
| No  | Yes | (3-4) | Yes |
| No  | Yes | (3-4) | Yes |
| No  | Yes | (3-4) | Yes |
| No  | Yes | (3-4) | Yes |
| No  | Yes | (3-4) | Yes |
| No  | Yes | (3-4) | No  |
| No  | Yes | (3-4) | No  |
| No  | Yes | (3-4) | No  |
| No  | Yes | (3-4) | No  |
| No  | Yes | (3-4) | No  |
| No  | Yes | (3-4) | No  |
| No  | Yes | (3-4) | No  |
| Yes | Yes | (1-2) | No  |
| Yes | Yes | (1-2) | No  |
| Yes | Yes | (1-2) | No  |
| Yes | Yes | (1-2) | No  |
| Yes | Yes | (1-2) | No  |
| Yes | Yes | (1-2) | No  |
| Yes | Yes | (1-2) | No  |
| No  | No  | 0     | No  |
| No  | No  | 0     | No  |
| No  | No  | 0     | No  |

|     |     |       |     |
|-----|-----|-------|-----|
| Yes | Yes | (+5)  | Yes |
| Yes | Yes | (+5)  | Yes |
| Yes | Yes | (+5)  | Yes |
| Yes | Yes | (+5)  | Yes |
| Yes | Yes | (+5)  | Yes |
| Yes | Yes | (+5)  | Yes |
| Yes | Yes | (+5)  | Yes |
| No  | Yes | (1-2) | No  |
| No  | Yes | (1-2) | No  |
| No  | Yes | (1-2) | No  |
| No  | Yes | (1-2) | No  |
| No  | Yes | (1-2) | No  |
| Yes | No  | 0     | No  |
| Yes | No  | 0     | No  |
| Yes | No  | 0     | No  |
| Yes | No  | 0     | No  |
| Yes | No  | 0     | No  |
| Yes | Yes | (1-2) | No  |
| Yes | Yes | (1-2) | No  |
| Yes | Yes | (1-2) | No  |
| Yes | Yes | (1-2) | No  |
| Yes | Yes | (1-2) | No  |
| Yes | Yes | (1-2) | Yes |
| Yes | Yes | (1-2) | Yes |
| Yes | Yes | (1-2) | Yes |
| Yes | Yes | (1-2) | Yes |
| Yes | Yes | (1-2) | Yes |
| Yes | Yes | (1-2) | Yes |
| Yes | Yes | (1-2) | Yes |
| Yes | Yes | (1-2) | Yes |
| Yes | Yes | (1-2) | Yes |
| Yes | Yes | (1-2) | Yes |
| Yes | Yes | (1-2) | Yes |
| Yes | Yes | (1-2) | Yes |
| Yes | Yes | (1-2) | Yes |
| Yes | Yes | (1-2) | Yes |
| Yes | No  | 0     | No  |
| Yes | No  | 0     | No  |
| Yes | No  | 0     | No  |
| Yes | No  | 0     | No  |
| Yes | No  | 0     | No  |
| Yes | Yes | (3-4) | Yes |
| Yes | Yes | (3-4) | Yes |
| Yes | Yes | (3-4) | Yes |
| Yes | Yes | (3-4) | Yes |
| Yes | Yes | (3-4) | Yes |

|     |     |       |     |
|-----|-----|-------|-----|
| Yes | Yes | (3-4) | Yes |
| Yes | Yes | (3-4) | Yes |
| Yes | No  | 0     | No  |
| Yes | No  | 0     | No  |
| Yes | No  | 0     | No  |
| Yes | No  | 0     | No  |
| Yes | Yes | (1-2) | No  |
| Yes | Yes | (1-2) | No  |
| Yes | Yes | (1-2) | No  |
| Yes | Yes | (1-2) | No  |
| Yes | Yes | (1-2) | No  |
| Yes | Yes | (1-2) | No  |
| Yes | Yes | (1-2) | No  |
| Yes | Yes | (1-2) | No  |
| Yes | Yes | (3-4) | No  |
| Yes | Yes | (3-4) | No  |
| Yes | Yes | (3-4) | No  |
| Yes | Yes | (3-4) | No  |
| Yes | Yes | (3-4) | No  |
| Yes | Yes | (3-4) | No  |
| Yes | Yes | (3-4) | No  |
| Yes | Yes | (3-4) | No  |
| No  | No  | 0     | No  |
| No  | No  | 0     | No  |
| No  | No  | 0     | No  |
| No  | No  | 0     | No  |
| No  | No  | 0     | No  |
| No  | No  | 0     | No  |
| Yes | Yes | (1-2) | Yes |
| Yes | Yes | (1-2) | Yes |
| Yes | Yes | (1-2) | Yes |
| Yes | Yes | (1-2) | Yes |
| Yes | Yes | (1-2) | Yes |
| Yes | Yes | (3-4) | No  |
| Yes | Yes | (3-4) | No  |
| Yes | Yes | (3-4) | No  |
| Yes | Yes | (3-4) | No  |
| Yes | Yes | (3-4) | No  |
| Yes | Yes | (1-2) | No  |
| Yes | Yes | (1-2) | No  |
| Yes | Yes | (1-2) | No  |
| Yes | Yes | (1-2) | No  |
| Yes | Yes | (1-2) | No  |
| Yes | Yes | 0     | No  |
| Yes | Yes | 0     | No  |
| Yes | Yes | 0     | No  |
| Yes | Yes | 0     | No  |
| Yes | Yes | (1-2) | No  |



|     |     |       |     |
|-----|-----|-------|-----|
| Yes | Yes | (1-2) | No  |
| Yes | Yes | (1-2) | No  |
| Yes | Yes | (1-2) | No  |
| Yes | Yes | (1-2) | No  |
| Yes | Yes | (1-2) | No  |
| Yes | Yes | (1-2) | No  |
| Yes | Yes | (1-2) | No  |
| Yes | Yes | (1-2) | No  |
| Yes | No  | 0     | No  |
| Yes | No  | 0     | No  |
| Yes | No  | 0     | No  |
| Yes | No  | 0     | No  |
| Yes | No  | 0     | No  |
| Yes | No  | 0     | No  |
| Yes | No  | 0     | No  |
| Yes | Yes | (1-2) | No  |
| Yes | Yes | (1-2) | No  |
| Yes | Yes | (1-2) | No  |
| Yes | Yes | (1-2) | No  |
| Yes | Yes | (1-2) | No  |
| Yes | Yes | (1-2) | No  |
| Yes | Yes | (1-2) | Yes |
| Yes | Yes | (1-2) | Yes |
| Yes | Yes | (1-2) | Yes |
| Yes | Yes | (1-2) | Yes |
| Yes | Yes | (1-2) | Yes |
| Yes | Yes | (1-2) | Yes |
| Yes | Yes | (1-2) | Yes |
| Yes | Yes | (1-2) | Yes |
| Yes | Yes | (3-4) | No  |
| Yes | Yes | (3-4) | No  |
| Yes | Yes | (3-4) | No  |
| Yes | Yes | (3-4) | No  |
| Yes | Yes | (3-4) | No  |
| No  | Yes | (3-4) | No  |
| No  | No  | 0     | No  |
| No  | No  | 0     | No  |
| No  | No  | 0     | No  |
| No  | No  | 0     | No  |
| No  | No  | 0     | No  |
| No  | No  | 0     | No  |
| No  | Yes | (1-2) | Yes |
| No  | Yes | (1-2) | Yes |
| No  | Yes | (1-2) | Yes |
| No  | Yes | (1-2) | Yes |
| Yes | No  | 0     | No  |
| Yes | No  | 0     | No  |
| Yes | No  | 0     | No  |
| Yes | No  | 0     | No  |
| Yes | No  | 0     | No  |
| Yes | Yes | (1-2) | Yes |

|     |     |       |     |
|-----|-----|-------|-----|
| Yes | Yes | (1-2) | Yes |
| Yes | Yes | (1-2) | Yes |
| Yes | Yes | (1-2) | Yes |
| Yes | Yes | (1-2) | Yes |
| Yes | Yes | (1-2) | Yes |
| Yes | Yes | (1-2) | Yes |
| Yes | No  | 0     | No  |
| Yes | No  | 0     | No  |
| Yes | No  | 0     | No  |
| Yes | No  | 0     | No  |
| Yes | No  | 0     | No  |
| Yes | No  | 0     | No  |
| Yes | No  | 0     | No  |
| Yes | Yes | (3-4) | Yes |
| Yes | Yes | (3-4) | Yes |
| Yes | Yes | (3-4) | Yes |
| Yes | Yes | (3-4) | Yes |
| Yes | Yes | (3-4) | Yes |
| Yes | Yes | (3-4) | Yes |
| Yes | Yes | (3-4) | Yes |
| Yes | Yes | (3-4) | Yes |
| Yes | Yes | (3-4) | Yes |
| Yes | No  | 0     | No  |
| Yes | No  | 0     | No  |
| Yes | No  | 0     | No  |
| Yes | No  | 0     | No  |
| Yes | No  | 0     | No  |
| Yes | No  | 0     | No  |
| Yes | No  | 0     | No  |
| No  | No  | 0     | No  |
| No  | No  | 0     | No  |
| No  | No  | 0     | No  |
| No  | No  | 0     | No  |
| No  | No  | 0     | No  |
| No  | No  | 0     | No  |
| Yes | Yes | (1-2) | No  |
| Yes | Yes | (1-2) | No  |
| Yes | Yes | (1-2) | No  |
| Yes | Yes | (1-2) | No  |
| Yes | Yes | (1-2) | No  |
| Yes | Yes | (1-2) | No  |
| Yes | Yes | (1-2) | No  |
| Yes | Yes | (1-2) | No  |
| Yes | Yes | (1-2) | No  |
| Yes | Yes | (3-4) | No  |
| Yes | Yes | (3-4) | No  |
| Yes | Yes | (3-4) | No  |
| Yes | Yes | (3-4) | No  |
| Yes | Yes | (3-4) | No  |

|     |     |       |     |
|-----|-----|-------|-----|
| Yes | Yes | (1-2) | Yes |
| Yes | Yes | (1-2) | Yes |
| Yes | Yes | (1-2) | Yes |
| Yes | Yes | (1-2) | Yes |
| Yes | Yes | (1-2) | Yes |
| Yes | Yes | (1-2) | Yes |
| No  | Yes | (1-2) | No  |
| No  | Yes | (1-2) | No  |
| No  | Yes | (1-2) | No  |
| No  | Yes | (1-2) | No  |
| No  | Yes | (1-2) | No  |
| No  | Yes | (1-2) | No  |
| No  | Yes | (1-2) | No  |
| No  | Yes | (3-4) | Yes |
| No  | Yes | (3-4) | Yes |
| No  | Yes | (3-4) | Yes |
| No  | Yes | (3-4) | Yes |
| No  | Yes | (3-4) | Yes |
| No  | Yes | (1-2) | No  |
| No  | Yes | (1-2) | No  |
| No  | Yes | (1-2) | No  |
| Yes | Yes | (3-4) | Yes |
| Yes | Yes | (3-4) | Yes |
| Yes | Yes | (3-4) | Yes |
| Yes | Yes | (3-4) | Yes |
| Yes | Yes | (3-4) | Yes |
| Yes | Yes | (3-4) | Yes |
| Yes | Yes | (3-4) | Yes |
| Yes | Yes | (3-4) | Yes |
| Yes | Yes | (3-4) | Yes |
| Yes | Yes | (3-4) | Yes |
| Yes | Yes | (3-4) | Yes |
| Yes | Yes | (3-4) | Yes |
| Yes | Yes | (1-2) | No  |
| Yes | Yes | (1-2) | No  |
| Yes | Yes | (1-2) | No  |
| Yes | Yes | (1-2) | No  |
| Yes | Yes | (1-2) | No  |
| Yes | Yes | (1-2) | No  |
| Yes | Yes | (1-2) | No  |
| Yes | Yes | (1-2) | No  |
| Yes | Yes | (1-2) | No  |
| Yes | Yes | (1-2) | No  |
| Yes | Yes | (1-2) | No  |
| Yes | Yes | (3-4) | Yes |
| Yes | Yes | (3-4) | Yes |
| Yes | Yes | (3-4) | Yes |
| Yes | Yes | (3-4) | Yes |
| Yes | No  | 0     | No  |

[illegible]

[illegible]

[illegible]

| Access of cats to water | Cats for control of rodents | Control of cat's pop | Cats consume plac |
|-------------------------|-----------------------------|----------------------|-------------------|
| Yes                     | Yes                         | No                   | Yes               |
| Yes                     | Yes                         | No                   | Yes               |
| Yes                     | Yes                         | No                   | Yes               |
| Yes                     | Yes                         | No                   | Yes               |
| Yes                     | Yes                         | No                   | Yes               |
| Yes                     | Yes                         | No                   | Yes               |
| Yes                     | Yes                         | No                   | Yes               |
| Yes                     | Yes                         | No                   | Yes               |
| Yes                     | Yes                         | No                   | Yes               |
| Yes                     | Yes                         | No                   | Yes               |
| Yes                     | Yes                         | No                   | Yes               |
| No                      | No                          | No                   | No                |
| No                      | No                          | No                   | No                |
| No                      | No                          | No                   | No                |
| No                      | No                          | No                   | No                |
| No                      | No                          | No                   | No                |
| No                      | No                          |                      |                   |
| Yes                     | No                          | No                   | Yes               |
| Yes                     | No                          | No                   | Yes               |
| Yes                     | No                          | No                   | Yes               |
| Yes                     | No                          | No                   | Yes               |
| Yes                     | No                          | No                   | Yes               |
| Yes                     | No                          | No                   | Yes               |
| Yes                     | No                          | No                   | Yes               |
| Yes                     | No                          | No                   | No                |
| Yes                     | No                          | No                   | No                |
| Yes                     | No                          | No                   | No                |
| No                      | No                          | No                   | Yes               |
| No                      | No                          | No                   | Yes               |
| No                      | No                          | No                   | Yes               |
| No                      | No                          | No                   | Yes               |
| No                      | No                          | No                   | Yes               |
| No                      | No                          | No                   | Yes               |
| No                      | No                          | No                   | Yes               |
| No                      | No                          | No                   | Yes               |
| Yes                     | Yes                         | No                   | No                |
| Yes                     | Yes                         | No                   | No                |

|     |     |     |     |
|-----|-----|-----|-----|
| Yes | Yes | No  | No  |
| Yes | Yes | No  | No  |
| Yes | Yes | No  | No  |
| Yes | Yes | No  | No  |
| Yes | Yes | No  | No  |
| Yes | Yes | No  | No  |
| Yes | Yes | No  | No  |
| Yes | Yes | No  | No  |
| No  | No  |     |     |
| Yes | Yes | Yes | Yes |
| Yes | Yes | Yes | Yes |
| Yes | Yes | Yes | Yes |
| Yes | Yes | Yes | Yes |
| Yes | Yes | Yes | Yes |
| Yes | Yes | Yes | Yes |
| Yes | Yes | Yes | Yes |
| Yes | No  | No  | Yes |
| Yes | No  | No  | Yes |
| Yes | No  | No  | Yes |
| Yes | No  | No  | Yes |
| Yes | No  | No  | Yes |
| Yes | No  | No  | Yes |
| Yes | No  | No  | Yes |
| Yes | Yes | No  | Yes |
| Yes | Yes | No  | Yes |
| Yes | Yes | No  | Yes |
| Yes | Yes | No  | Yes |
| Yes | Yes | No  | Yes |
| Yes | Yes | No  | Yes |
| Yes | Yes | No  | Yes |
| No  | No  |     |     |
| No  | No  |     |     |
| No  | No  |     |     |



|     |     |     |     |
|-----|-----|-----|-----|
| Yes | Yes | No  | Yes |
| Yes | Yes | No  | Yes |
| Yes | Yes | No  | Yes |
| Yes | Yes | No  | Yes |
| Yes | Yes | No  | Yes |
| Yes | Yes | No  | Yes |
| Yes | Yes | No  | Yes |
| Yes | Yes | No  | Yes |
| Yes | Yes | Yes | Yes |
| Yes | Yes | Yes | Yes |
| Yes | Yes | Yes | Yes |
| Yes | Yes | Yes | Yes |
| No  | No  |     |     |
| Yes | No  | No  | No  |
| Yes | No  | No  | No  |
| Yes | No  | No  | No  |
| Yes | No  | No  | No  |
| Yes | No  | No  | No  |
| Yes | Yes | No  | No  |
| Yes | Yes | No  | No  |
| Yes | Yes | No  | No  |
| Yes | Yes | No  | No  |
| Yes | Yes | No  | No  |
| Yes | Yes | No  | No  |
| Yes | No  | No  | Yes |
| Yes | No  | No  | Yes |
| Yes | No  | No  | Yes |
| Yes | No  | No  | Yes |
| Yes | No  | No  | Yes |
| No  | No  | No  | Yes |
| No  | No  | No  | Yes |
| No  | No  | No  | Yes |
| No  | No  | No  | Yes |
| No  | No  | No  | Yes |
| No  | No  | No  | Yes |
| No  | No  |     |     |
| No  | No  | No  | Yes |
| No  | No  | No  | Yes |
| No  | No  | No  | Yes |
| No  | No  | No  | Yes |
| No  | No  | No  | Yes |

|     |     |    |     |
|-----|-----|----|-----|
| No  | No  | No | Yes |
| No  | No  | No | Yes |
| No  | No  |    |     |
| Yes | No  | No | Yes |
| Yes | No  | No | Yes |
| Yes | No  | No | Yes |
| Yes | No  | No | Yes |
| No  | No  | No | No  |
| No  | No  | No | No  |
| No  | No  | No | No  |
| No  | No  | No | No  |
| Yes | No  | No | Yes |
| Yes | No  | No | Yes |
| Yes | No  | No | Yes |
| Yes | No  | No | Yes |
| Yes | No  | No | Yes |
| Yes | No  | No | Yes |
| Yes | No  | No | Yes |
| Yes | No  | No | Yes |
| No  | No  |    |     |
| Yes | No  | No | No  |
| Yes | No  | No | No  |
| Yes | No  | No | No  |
| Yes | No  | No | No  |
| Yes | No  | No | No  |
| Yes | Yes | No | Yes |
| Yes | Yes | No | Yes |
| Yes | Yes | No | Yes |
| Yes | Yes | No | Yes |
| Yes | Yes | No | Yes |
| No  | Yes | No | Yes |
| No  | Yes | No | Yes |
| No  | Yes | No | Yes |
| No  | Yes | No | Yes |
| No  | No  |    |     |
| Yes | No  | No | Yes |

|     |     |     |     |
|-----|-----|-----|-----|
| Yes | No  | No  | Yes |
| Yes | No  | No  | Yes |
| Yes | No  | No  | Yes |
| Yes | No  | No  | Yes |
| Yes | No  | No  | Yes |
| Yes | No  | No  | Yes |
| Yes | No  | No  | Yes |
| Yes | No  | No  | Yes |
| No  | No  |     |     |
| Yes | No  | No  | Yes |
| Yes | No  | No  | Yes |
| Yes | No  | No  | Yes |
| Yes | No  | No  | Yes |
| Yes | No  | No  | Yes |
| Yes | No  | No  | Yes |
| No  | Yes | No  | No  |
| No  | Yes | No  | No  |
| No  | Yes | No  | No  |
| No  | Yes | No  | No  |
| No  | Yes | No  | No  |
| No  | Yes | No  | No  |
| Yes | Yes | Yes | Yes |
| Yes | Yes | Yes | Yes |
| Yes | Yes | Yes | Yes |
| Yes | Yes | Yes | Yes |
| Yes | Yes | Yes | Yes |
| Yes | Yes | Yes | Yes |
| No  | No  |     |     |
| No  | No  | No  | No  |
| No  | No  | No  | No  |
| No  | No  | No  | No  |
| No  | No  | No  | No  |
| No  | No  |     |     |
| No  | Yes | No  | Yes |

|     |     |    |     |
|-----|-----|----|-----|
| No  | Yes | No | Yes |
| No  | Yes | No | Yes |
| No  | Yes | No | Yes |
| No  | Yes | No | Yes |
| No  | Yes | No | Yes |
| No  | Yes | No | Yes |
| No  | No  |    |     |
| Yes | No  | No | Yes |
| Yes | No  | No | Yes |
| Yes | No  | No | Yes |
| Yes | No  | No | Yes |
| Yes | No  | No | Yes |
| Yes | No  | No | Yes |
| Yes | No  | No | Yes |
| Yes | No  | No | Yes |
| Yes | No  | No | Yes |
| No  | No  |    |     |
| Yes | Yes | No | Yes |
| Yes | Yes | No | Yes |
| Yes | Yes | No | Yes |
| Yes | Yes | No | Yes |
| Yes | Yes | No | Yes |
| Yes | Yes | No | Yes |
| Yes | Yes | No | Yes |
| Yes | Yes | No | Yes |
| Yes | Yes | No | Yes |
| Yes | No  | No | Yes |
| Yes | No  | No | Yes |
| Yes | No  | No | Yes |
| Yes | No  | No | Yes |
| Yes | No  | No | Yes |

|     |     |    |     |
|-----|-----|----|-----|
| Yes | No  | No | No  |
| Yes | No  | No | No  |
| Yes | No  | No | No  |
| Yes | No  | No | No  |
| Yes | No  | No | No  |
| Yes | No  | No | No  |
| Yes | No  | No | Yes |
| Yes | No  | No | Yes |
| Yes | No  | No | Yes |
| Yes | No  | No | Yes |
| Yes | No  | No | Yes |
| Yes | No  | No | Yes |
| Yes | No  | No | Yes |
| No  | Yes | No | No  |
| No  | Yes | No | No  |
| No  | Yes | No | No  |
| No  | Yes | No | No  |
| No  | Yes | No | No  |
| Yes | No  | No | No  |
| Yes | No  | No | No  |
| Yes | No  | No | No  |
| Yes | No  | No | Yes |
| Yes | No  | No | Yes |
| Yes | No  | No | Yes |
| Yes | No  | No | Yes |
| Yes | No  | No | Yes |
| Yes | No  | No | Yes |
| No  | No  | No | No  |
| No  | No  | No | No  |
| No  | No  | No | No  |
| No  | No  | No | No  |
| No  | No  | No | No  |
| No  | No  | No | No  |
| No  | No  | No | No  |
| No  | No  | No | No  |
| Yes | No  | No | Yes |
| Yes | No  | No | Yes |
| Yes | No  | No | Yes |
| Yes | No  | No | Yes |
| Yes | No  | No | Yes |
| Yes | No  | No | Yes |
| Yes | No  | No | Yes |
| Yes | No  | No | No  |
| Yes | No  | No | No  |
| Yes | No  | No | No  |
| Yes | No  | No | No  |
| Yes | No  | No | Yes |
| Yes | No  | No | Yes |
| Yes | No  | No | Yes |
| Yes | No  | No | Yes |
| No  | No  |    |     |

[illegible]

[illegible]

|     |    |    |    |
|-----|----|----|----|
| Yes | No | No | No |
| Yes | No | No | No |
| Yes | No | No | No |
| Yes | No | No | No |
| Yes | No | No | No |
| Yes | No | No | No |
| Yes | No | No | No |
| No  | No | No | No |
| No  | No | No | No |
| No  | No | No | No |
| No  | No | No | No |
| No  | No | No | No |
| No  | No | No | No |
|     |    |    |    |
|     |    |    |    |



[illegible]

[illegible]

[illegible]

|     |     |      |    |
|-----|-----|------|----|
| No  | No  | Good | No |
| No  | No  | Good | No |
| No  | No  | Bad  | No |
| No  | No  | Bad  | No |
| No  | No  | Bad  | No |
| No  | No  | Bad  | No |
| No  | No  | Good | No |
| No  | No  | Good | No |
| No  | No  | Good | No |
| No  | No  | Good | No |
| No  | No  | Bad  | No |
| No  | No  | Bad  | No |
| No  | No  | Bad  | No |
| No  | No  | Bad  | No |
| No  | No  | Good | No |
| No  | No  | Good | No |
| No  | No  | Good | No |
| No  | No  | Good | No |
| No  | No  | Good | No |
| No  | No  | Good | No |
| No  | No  | Good | No |
| No  | No  | Good | No |
| No  | No  | Good | No |
| No  | No  | Good | No |
| No  | Yes | Good | No |
| No  | Yes | Good | No |
| No  | Yes | Good | No |
| No  | Yes | Good | No |
| No  | Yes | Good | No |
| No  | Yes | Good | No |
| No  | No  | Good | No |
| No  | No  | Good | No |
| No  | No  | Good | No |
| No  | No  | Good | No |
| No  | No  | Good | No |
| No  | No  | Good | No |
| Yes | No  | Good | No |
| Yes | No  | Good | No |
| Yes | No  | Good | No |
| Yes | No  | Good | No |
| Yes | No  | Good | No |
| Yes | No  | Good | No |
| No  | No  | Good | No |
| No  | No  | Good | No |
| No  | No  | Good | No |
| No  | No  | Good | No |
| No  | No  | Good | No |
| No  | No  | Bad  | No |
| No  | No  | Bad  | No |
| No  | No  | Bad  | No |
| No  | No  | Bad  | No |
| No  | No  | Good | No |

[illegible]

[illegible]

|     |     |      |     |
|-----|-----|------|-----|
| No  | No  | Good | No  |
| No  | No  | Good | No  |
| No  | No  | Good | No  |
| No  | No  | Good | No  |
| No  | No  | Good | No  |
| No  | No  | Good | No  |
| No  | No  | Good | No  |
| No  | No  | Good | No  |
| No  | No  | Good | No  |
| No  | No  | Good | No  |
| No  | No  | Good | No  |
| No  | No  | Good | No  |
| No  | No  | Good | No  |
| No  | No  | Good | No  |
| No  | No  | Bad  | No  |
| No  | No  | Bad  | No  |
| No  | No  | Bad  | No  |
| No  | No  | Bad  | No  |
| No  | No  | Bad  | No  |
| No  | No  | Good | No  |
| No  | No  | Good | No  |
| No  | No  | Good | No  |
| No  | Yes | Bad  | Yes |
| No  | Yes | Bad  | Yes |
| No  | Yes | Bad  | Yes |
| No  | Yes | Bad  | Yes |
| No  | Yes | Bad  | Yes |
| No  | Yes | Bad  | Yes |
| Yes | No  | Good | No  |
| Yes | No  | Good | No  |
| Yes | No  | Good | No  |
| Yes | No  | Good | No  |
| Yes | No  | Good | No  |
| Yes | No  | Good | No  |
| Yes | No  | Good | No  |
| Yes | No  | Good | No  |
| Yes | No  | Good | No  |
| Yes | No  | Good | No  |
| Yes | No  | Good | No  |
| Yes | No  | Good | No  |
| Yes | No  | Good | No  |
| Yes | No  | Good | No  |
| Yes | No  | Good | No  |
| No  | No  | Bad  | No  |
| No  | No  | Bad  | No  |
| No  | No  | Bad  | No  |
| No  | No  | Bad  | No  |
| No  | No  | Good | No  |
| No  | No  | Good | No  |
| No  | No  | Good | No  |
| No  | No  | Good | No  |
| No  | Yes | Bad  | No  |

[illegible]



|     |     |        |    |
|-----|-----|--------|----|
| No  | No  | Medium | No |
| No  | No  | Medium | No |
| No  | No  | Medium | No |
| No  | No  | Medium | No |
| No  | No  | Medium | No |
| No  | No  | Medium | No |
| No  | No  | Medium | No |
| No  | No  | Medium | No |
| No  | No  | Medium | No |
| No  | No  | Medium | No |
| No  | No  | Medium | No |
| No  | No  | Medium | No |
| No  | No  | Good   | No |
| No  | No  | Good   | No |
| No  | No  | Good   | No |
| No  | No  | Good   | No |
| No  | No  | Good   | No |
| No  | No  | Good   | No |
| Yes | No  | Medium | No |
| Yes | No  | Medium | No |
| Yes | No  | Medium | No |
| Yes | No  | Medium | No |
| Yes | No  | Medium | No |
| No  | No  | Medium | No |
| No  | No  | Medium | No |
| No  | No  | Medium | No |
| No  | No  | Medium | No |
| No  | No  | Medium | No |
| No  | No  | Medium | No |
| No  | No  | Medium | No |
| No  | No  | Medium | No |
| No  | No  | Medium | No |
| No  | No  | Medium | No |
| No  | No  | Medium | No |
| Yes | No  | Medium | No |
| Yes | No  | Medium | No |
| Yes | No  | Medium | No |
| Yes | No  | Medium | No |
| Yes | No  | Medium | No |
| Yes | No  | Medium | No |
| No  | Yes | Medium | No |
| No  | Yes | Medium | No |
| No  | Yes | Medium | No |
| No  | Yes | Medium | No |
| Yes | No  | Medium | No |
| Yes | No  | Medium | No |
| Yes | No  | Medium | No |
| Yes | No  | Medium | No |
| Yes | No  | Medium | No |
| Yes | No  | Medium | No |
| Yes | No  | Medium | No |
| No  | No  | Medium | No |

[illegible]

[illegible]

[illegible]

[illegible]

[illegible]

[illegible]

|     |     |     |     |
|-----|-----|-----|-----|
| No  | Yes | Yes | Yes |
| No  | Yes | Yes | Yes |
| No  | Yes | Yes | Yes |
| No  | Yes | Yes | Yes |
| No  | Yes | Yes | Yes |
| No  | Yes | Yes | Yes |
| Yes | No  | No  | No  |
| Yes | No  | No  | No  |
| Yes | No  | No  | No  |
| Yes | No  | No  | No  |
| Yes | No  | No  | No  |
| Yes | No  | No  | No  |
| No  | No  | Yes | Yes |
| No  | No  | Yes | Yes |
| No  | No  | Yes | Yes |
| No  | No  | Yes | Yes |
| No  | No  | Yes | Yes |
| No  | No  | Yes | Yes |
| No  | No  | Yes | Yes |
| No  | No  | Yes | Yes |
| No  | No  | Yes | Yes |
| No  | No  | Yes | Yes |
| No  | No  | Yes | Yes |
| No  | No  | Yes | Yes |
| No  | No  | Yes | Yes |
| No  | No  | Yes | Yes |
| No  | No  | Yes | Yes |
| No  | No  | No  | Yes |
| No  | No  | No  | Yes |
| No  | No  | No  | Yes |
| No  | No  | Yes | Yes |
| No  | No  | Yes | Yes |
| No  | No  | Yes | Yes |
| No  | No  | Yes | Yes |
| No  | No  | Yes | Yes |
| No  | No  | Yes | Yes |
| No  | No  | Yes | Yes |
| No  | No  | No  | Yes |
| No  | No  | No  | Yes |
| No  | No  | No  | Yes |
| No  | No  | Yes | Yes |
| No  | No  | Yes | Yes |
| No  | No  | Yes | Yes |
| No  | No  | Yes | Yes |
| No  | No  | No  | Yes |
| No  | No  | No  | Yes |
| No  | No  | No  | Yes |
| No  | No  | No  | Yes |



[illegible]

[illegible]

|     |     |     |     |
|-----|-----|-----|-----|
| No  | No  | Yes | No  |
| No  | No  | Yes | No  |
| No  | No  | Yes | No  |
| No  | No  | Yes | No  |
| No  | No  | Yes | No  |
| No  | No  | Yes | No  |
| No  | No  | Yes | No  |
| No  | No  | Yes | No  |
| No  | No  | Yes | No  |
| No  | No  | Yes | No  |
| No  | No  | Yes | No  |
| Yes | No  | Yes | No  |
| Yes | No  | Yes | No  |
| Yes | No  | Yes | No  |
| Yes | No  | Yes | No  |
| Yes | No  | Yes | No  |
| Yes | Yes | Yes | Yes |
| Yes | Yes | Yes | Yes |
| Yes | Yes | Yes | Yes |
| Yes | Yes | Yes | Yes |
| Yes | Yes | Yes | Yes |
| No  | Yes | No  | Yes |
| No  | Yes | No  | Yes |
| No  | Yes | No  | Yes |
| No  | Yes | No  | Yes |
| No  | Yes | No  | Yes |
| No  | Yes | No  | No  |
| No  | Yes | No  | No  |
| No  | Yes | No  | No  |
| No  | Yes | No  | No  |
| No  | Yes | No  | No  |
| No  | Yes | No  | No  |
| No  | No  | No  | Yes |
| No  | No  | No  | Yes |
| No  | No  | No  | Yes |
| No  | No  | No  | Yes |
| No  | No  | No  | Yes |
| No  | No  | Yes | No  |
| No  | No  | Yes | No  |
| No  | No  | Yes | No  |
| Yes | No  | No  | No  |
| Yes | No  | No  | No  |
| Yes | No  | No  | No  |
| Yes | No  | No  | No  |
| Yes | No  | No  | No  |
| No  | No  | No  | No  |

[illegible]

[illegible]

[illegible]

[illegible]

|     |     |     |     |
|-----|-----|-----|-----|
| No  | No  | Yes | Yes |
| No  | No  | Yes | Yes |
| Yes | Yes | Yes | Yes |
| Yes | Yes | Yes | Yes |
| Yes | Yes | Yes | Yes |
| Yes | Yes | Yes | Yes |
| No  | No  | Yes | Yes |
| No  | No  | Yes | Yes |
| No  | No  | Yes | Yes |
| No  | No  | Yes | Yes |
| No  | No  | No  | No  |
| No  | No  | No  | No  |
| No  | No  | No  | No  |
| No  | No  | No  | No  |
| No  | Yes | Yes | Yes |
| No  | Yes | Yes | Yes |
| No  | Yes | Yes | Yes |
| No  | Yes | Yes | Yes |
| No  | Yes | Yes | Yes |
| No  | Yes | Yes | Yes |
| No  | Yes | Yes | Yes |
| No  | Yes | Yes | Yes |
| Yes | No  | Yes | Yes |
| Yes | No  | Yes | Yes |
| Yes | No  | Yes | Yes |
| Yes | No  | Yes | Yes |
| Yes | No  | Yes | Yes |
| Yes | No  | Yes | Yes |
| Yes | No  | Yes | Yes |
| Yes | No  | Yes | Yes |
| Yes | Yes | No  | Yes |
| Yes | Yes | No  | Yes |
| Yes | Yes | No  | Yes |
| Yes | Yes | No  | Yes |
| Yes | Yes | No  | Yes |
| Yes | Yes | No  | Yes |
| Yes | Yes | No  | Yes |
| Yes | No  | No  | Yes |
| Yes | No  | No  | Yes |
| Yes | No  | No  | Yes |
| Yes | No  | No  | Yes |
| Yes | No  | No  | Yes |
| No  | No  | Yes | Yes |
| No  | No  | Yes | Yes |
| No  | No  | Yes | Yes |
| No  | No  | Yes | Yes |
| No  | No  | Yes | Yes |
| Yes | No  | Yes | Yes |
| Yes | No  | Yes | Yes |
| Yes | No  | Yes | Yes |
| Yes | No  | Yes | Yes |
| No  | No  | Yes | Yes |



|     |     |     |     |
|-----|-----|-----|-----|
| No  | No  | Yes | Yes |
| No  | No  | Yes | Yes |
| No  | No  | Yes | Yes |
| No  | No  | Yes | Yes |
| No  | No  | Yes | Yes |
| No  | No  | Yes | Yes |
| No  | No  | Yes | Yes |
| No  | No  | Yes | Yes |
| No  | No  | Yes | Yes |
| No  | No  | Yes | Yes |
| No  | No  | Yes | Yes |
| No  | No  | Yes | Yes |
| No  | No  | Yes | Yes |
| No  | No  | Yes | Yes |
| No  | No  | Yes | Yes |
| No  | No  | Yes | Yes |
| Yes | No  | No  | Yes |
| Yes | No  | No  | Yes |
| Yes | No  | No  | Yes |
| Yes | No  | No  | Yes |
| Yes | No  | No  | Yes |
| No  | No  | No  | Yes |
| No  | No  | No  | Yes |
| No  | No  | No  | Yes |
| No  | No  | No  | Yes |
| No  | No  | No  | Yes |
| No  | No  | No  | Yes |
| No  | No  | No  | Yes |
| No  | No  | No  | Yes |
| No  | No  | No  | Yes |
| No  | No  | No  | Yes |
| Yes | No  | No  | Yes |
| Yes | No  | No  | Yes |
| Yes | No  | No  | Yes |
| Yes | No  | No  | Yes |
| Yes | No  | No  | Yes |
| Yes | No  | No  | Yes |
| Yes | No  | No  | Yes |
| No  | No  | Yes | Yes |
| No  | No  | Yes | Yes |
| No  | No  | Yes | Yes |
| No  | No  | Yes | Yes |
| No  | No  | Yes | Yes |
| Yes | Yes | No  | Yes |
| Yes | Yes | No  | Yes |
| Yes | Yes | No  | Yes |
| Yes | Yes | No  | Yes |
| Yes | No  | No  | Yes |
| Yes | No  | No  | Yes |
| Yes | No  | No  | Yes |
| Yes | No  | No  | Yes |
| Yes | No  | No  | Yes |
| No  | Yes | Yes | Yes |

|     |     |     |     |
|-----|-----|-----|-----|
| No  | Yes | Yes | Yes |
| No  | Yes | Yes | Yes |
| No  | Yes | Yes | Yes |
| No  | Yes | Yes | Yes |
| No  | Yes | Yes | Yes |
| No  | Yes | Yes | Yes |
| Yes | No  | Yes | Yes |
| Yes | No  | Yes | Yes |
| Yes | No  | Yes | Yes |
| Yes | No  | Yes | Yes |
| Yes | No  | Yes | Yes |
| Yes | No  | Yes | Yes |
| Yes | No  | No  | Yes |
| Yes | No  | No  | Yes |
| Yes | No  | No  | Yes |
| Yes | No  | No  | Yes |
| Yes | No  | No  | Yes |
| Yes | No  | No  | Yes |
| Yes | No  | No  | Yes |
| Yes | No  | No  | Yes |
| Yes | No  | No  | Yes |
| Yes | No  | No  | Yes |
| Yes | No  | No  | Yes |
| Yes | No  | No  | Yes |
| Yes | No  | No  | Yes |
| Yes | No  | No  | Yes |
| Yes | No  | No  | Yes |
| Yes | No  | No  | Yes |
| Yes | No  | No  | Yes |
| Yes | Yes | No  | Yes |
| Yes | Yes | No  | Yes |
| Yes | Yes | No  | Yes |
| Yes | Yes | No  | Yes |
| No  | No  | Yes | Yes |
| No  | No  | Yes | Yes |
| No  | No  | Yes | Yes |
| No  | No  | Yes | Yes |
| No  | No  | Yes | Yes |
| No  | No  | Yes | Yes |
| No  | No  | Yes | Yes |
| No  | No  | Yes | Yes |
| No  | No  | Yes | Yes |
| No  | No  | No  | Yes |
| No  | No  | No  | Yes |
| No  | No  | No  | Yes |
| No  | No  | No  | Yes |
| No  | No  | No  | Yes |

|     |     |     |     |
|-----|-----|-----|-----|
| Yes | Yes | No  | Yes |
| Yes | Yes | No  | Yes |
| Yes | Yes | No  | Yes |
| Yes | Yes | No  | Yes |
| Yes | Yes | No  | Yes |
| Yes | Yes | No  | Yes |
| No  | No  | Yes | Yes |
| No  | No  | Yes | Yes |
| No  | No  | Yes | Yes |
| No  | No  | Yes | Yes |
| No  | No  | Yes | Yes |
| No  | No  | Yes | Yes |
| No  | No  | Yes | Yes |
| No  | No  | Yes | Yes |
| No  | No  | Yes | Yes |
| No  | No  | Yes | Yes |
| No  | No  | Yes | Yes |
| No  | No  | Yes | Yes |
| No  | No  | Yes | Yes |
| No  | No  | Yes | Yes |
| No  | No  | Yes | Yes |
| No  | No  | Yes | Yes |
| No  | No  | Yes | Yes |
| No  | No  | Yes | Yes |
| Yes | No  | No  | Yes |
| Yes | No  | No  | Yes |
| Yes | No  | No  | Yes |
| Yes | No  | No  | No  |
| Yes | No  | No  | No  |
| Yes | No  | Yes | Yes |
| Yes | No  | Yes | Yes |
| Yes | No  | Yes | Yes |
| Yes | No  | Yes | Yes |
| Yes | No  | Yes | Yes |
| Yes | No  | Yes | Yes |
| Yes | No  | Yes | Yes |
| Yes | No  | Yes | Yes |
| Yes | No  | Yes | Yes |
| Yes | No  | Yes | Yes |
| Yes | No  | Yes | Yes |
| Yes | No  | Yes | Yes |
| Yes | No  | Yes | Yes |
| Yes | No  | Yes | Yes |
| Yes | No  | Yes | Yes |
| Yes | No  | Yes | Yes |
| Yes | No  | Yes | Yes |
| Yes | No  | Yes | Yes |
| Yes | No  | Yes | Yes |
| Yes | No  | No  | Yes |
| Yes | No  | No  | Yes |
| Yes | No  | No  | Yes |
| No  | No  | Yes | Yes |

|     |     |     |     |
|-----|-----|-----|-----|
| No  | No  | Yes | Yes |
| No  | No  | Yes | Yes |
| No  | No  | Yes | Yes |
| No  | No  | Yes | Yes |
| No  | No  | Yes | Yes |
| No  | No  | Yes | Yes |
| No  | No  | Yes | Yes |
| No  | No  | Yes | Yes |
| No  | No  | Yes | Yes |
| No  | No  | Yes | Yes |
| No  | No  | Yes | Yes |
| No  | No  | Yes | Yes |
| No  | No  | Yes | Yes |
| No  | No  | Yes | Yes |
| No  | No  | Yes | Yes |
| No  | No  | Yes | Yes |
| No  | No  | Yes | Yes |
| No  | No  | Yes | Yes |
| No  | No  | Yes | Yes |
| No  | No  | Yes | Yes |
| Yes | Yes | Yes | Yes |
| Yes | Yes | Yes | Yes |
| Yes | Yes | Yes | Yes |
| Yes | Yes | Yes | Yes |
| Yes | Yes | Yes | Yes |
| Yes | Yes | Yes | Yes |
| Yes | Yes | Yes | Yes |
| Yes | Yes | Yes | Yes |
| No  | No  | Yes | Yes |
| No  | No  | Yes | Yes |
| No  | No  | Yes | Yes |
| No  | No  | Yes | Yes |
| No  | No  | Yes | Yes |
| No  | No  | Yes | Yes |
| No  | No  | Yes | Yes |
| No  | No  | Yes | Yes |
| No  | No  | Yes | Yes |
| No  | No  | Yes | Yes |
| No  | No  | Yes | No  |
| No  | No  | Yes | No  |
| No  | No  | Yes | No  |
| No  | No  | Yes | No  |
| No  | No  | Yes | No  |
| No  | No  | Yes | No  |
| No  | No  | Yes | No  |
| No  | No  | Yes | No  |
| Yes | No  | No  | Yes |
| Yes | No  | No  | Yes |
| Yes | No  | No  | Yes |
| Yes | No  | No  | Yes |
| Yes | No  | No  | Yes |
| Yes | No  | No  | Yes |
| Yes | No  | No  | Yes |
| Yes | No  | Yes | Yes |
| Yes | No  | Yes | Yes |

[illegible]

[illegible]

| History of abortion | % abortion | Proportion of abortions |
|---------------------|------------|-------------------------|
| 0                   | 21.73%     | 21-50%                  |
| A                   | 21.73%     | 21-50%                  |
| 0                   | 21.73%     | 21-50%                  |
| NA                  | 21.73%     | 21-50%                  |
| A                   | 21.73%     | 21-50%                  |
| 0                   | 21.73%     | 21-50%                  |
| NA                  | 21.73%     | 21-50%                  |
| 0                   | 21.73%     | 21-50%                  |
| 0                   | 21.73%     | 21-50%                  |
| A                   | 21.73%     | 21-50%                  |
| 0                   | 21.73%     | 21-50%                  |
| NA                  | 21.73%     | 21-50%                  |
| A                   | 16.66%     | 1-20%                   |
| 0                   | 16.66%     | 1-20%                   |
| NA                  | 16.66%     | 1-20%                   |
| A                   | 16.66%     | 1-20%                   |
| NA                  | 16.66%     | 1-20%                   |
| 0                   | 27.27%     | 21-50%                  |
| 0                   | 27.27%     | 21-50%                  |
| A                   | 27.27%     | 21-50%                  |
| A                   | 27.27%     | 21-50%                  |
| A                   | 27.27%     | 21-50%                  |
| NA                  | 27.27%     | 21-50%                  |
| A                   | 27.27%     | 21-50%                  |
| A                   | 27.27%     | 21-50%                  |
| A                   | 16.66%     | 1-20%                   |
| NA                  | 16.66%     | 1-20%                   |
| 0                   | 16.66%     | 1-20%                   |
| A                   | 16.66%     | 1-20%                   |
| NA                  | 16.66%     | 1-20%                   |
| A                   | 16.66%     | 1-20%                   |
| NA                  | 16.66%     | 1-20%                   |
| 0                   | 20%        | 1-20%                   |
| NA                  | 20%        | 1-20%                   |
| NA                  | 20%        | 1-20%                   |
| A                   | 20%        | 1-20%                   |
| 0                   | 20.83%     | 1-20%                   |
| NA                  | 20.83%     | 1-20%                   |
| A                   | 20.83%     | 1-20%                   |
| A                   | 20.83%     | 1-20%                   |
| 0                   | 20.83%     | 1-20%                   |
| NA                  | 20.83%     | 1-20%                   |
| A                   | 20.83%     | 1-20%                   |
| A                   | 20.83%     | 1-20%                   |
| NA                  | 20.83%     | 1-20%                   |
| 0                   | 31.81%     | 21-50%                  |
| A                   | 31.81%     | 21-50%                  |

|    |        |        |
|----|--------|--------|
| A  | 31.81% | 21-50% |
| A  | 31.81% | 21-50% |
| 0  | 31.81% | 21-50% |
| 0  | 31.81% | 21-50% |
| 0  | 31.81% | 21-50% |
| NA | 31.81% | 21-50% |
| A  | 31.81% | 21-50% |
| A  | 31.81% | 21-50% |
| A  | 19.04% | 1-20%  |
| 0  | 19.04% | 1-20%  |
| A  | 19.04% | 1-20%  |
| A  | 19.04% | 1-20%  |
| 0  | 19.04% | 1-20%  |
| 0  | 19.04% | 1-20%  |
| NA | 19.04% | 1-20%  |
| 0  | 19.04% | 1-20%  |
| NA | 19.04% | 1-20%  |
| A  | 19.04% | 1-20%  |
| A  | 19.04% | 1-20%  |
| 0  | 50%    | 21-50% |
| A  | 50%    | 21-50% |
| A  | 50%    | 21-50% |
| 0  | 50%    | 21-50% |
| 0  | 50%    | 21-50% |
| A  | 15%    | 1-20%  |
| NA | 15%    | 1-20%  |
| 0  | 15%    | 1-20%  |
| NA | 15%    | 1-20%  |
| 0  | 15%    | 1-20%  |
| A  | 15%    | 1-20%  |
| NA | 15%    | 1-20%  |
| A  | 14.28% | 1-20%  |
| NA | 14.28% | 1-20%  |
| NA | 14.28% | 1-20%  |
| NA | 14.28% | 1-20%  |
| A  | 14.28% | 1-20%  |
| A  | 14.28% | 1-20%  |
| 0  | 14.28% | 1-20%  |
| 0  | 14.28% | 1-20%  |
| 0  | 25%    | 21-50% |
| 0  | 25%    | 21-50% |
| A  | 25%    | 21-50% |
| NA | 25%    | 21-50% |
| 0  | 25%    | 21-50% |
| 0  | 25%    | 21-50% |
| NA | 25%    | 21-50% |
| A  | 25%    | 21-50% |
| NA | 0%     | 0%     |
| NA | 0%     | 0%     |
| 0  | 0%     | 0%     |



|    |        |        |
|----|--------|--------|
| 0  | 33.33% | 21-50% |
| NA | 33.33% | 21-50% |
| A  | 33.33% | 21-50% |
| A  | 33.33% | 21-50% |
| 0  | 33.33% | 21-50% |
| 0  | 33.33% | 21-50% |
| A  | 33.33% | 21-50% |
| NA | 33.33% | 21-50% |
| NA | 12.50% | 1-20%  |
| A  | 12.50% | 1-20%  |
| 0  | 12.50% | 1-20%  |
| 0  | 12.50% | 1-20%  |
| A  | 12.50% | 1-20%  |
| NA | 0%     | 0%     |
| NA | 0%     | 0%     |
| 0  | 0%     | 0%     |
| 0  | 0%     | 0%     |
| NA | 0%     | 0%     |
| 0  | 14.28% | 1-20%  |
| A  | 14.28% | 1-20%  |
| 0  | 14.28% | 1-20%  |
| NA | 14.28% | 1-20%  |
| A  | 14.28% | 1-20%  |
| A  | 25%    | 21-50% |
| NA | 25%    | 21-50% |
| 0  | 25%    | 21-50% |
| A  | 25%    | 21-50% |
| A  | 25%    | 21-50% |
| NA | 25%    | 21-50% |
| A  | 20%    | 1-20%  |
| A  | 20%    | 1-20%  |
| 0  | 20%    | 1-20%  |
| 0  | 20%    | 1-20%  |
| 0  | 20%    | 1-20%  |
| 0  | 12.50% | 1-20%  |
| 0  | 12.50% | 1-20%  |
| 0  | 12.50% | 1-20%  |
| A  | 12.50% | 1-20%  |
| A  | 12.50% | 1-20%  |
| NA | 12.50% | 1-20%  |
| NA | 0%     | 0%     |
| 0  | 0%     | 0%     |
| 0  | 14.28% | 1-20%  |
| 0  | 14.28% | 1-20%  |
| A  | 14.28% | 1-20%  |
| A  | 14.28% | 1-20%  |
| 0  | 14.28% | 1-20%  |

|    |        |        |
|----|--------|--------|
| A  | 14.28% | 1-20%  |
| NA | 14.28% | 1-20%  |
| NA | 33.33% | 21-50% |
| A  | 33.33% | 21-50% |
| 0  | 33.33% | 21-50% |
| 0  | 33.33% | 21-50% |
| A  | 16.66% | 1-20%  |
| NA | 16.66% | 1-20%  |
| NA | 16.66% | 1-20%  |
| 0  | 16.66% | 1-20%  |
| NA | 0%     | 0%     |
| NA | 0%     | 0%     |
| NA | 0%     | 0%     |
| 0  | 0%     | 0%     |
| 0  | 15.78% | 1-20%  |
| 0  | 15.78% | 1-20%  |
| A  | 15.78% | 1-20%  |
| NA | 15.78% | 1-20%  |
| NA | 15.78% | 1-20%  |
| 0  | 15.78% | 1-20%  |
| 0  | 15.78% | 1-20%  |
| NA | 15.78% | 1-20%  |
| NA | 15.78% | 1-20%  |
| NA | 0%     | 0%     |
| 0  | 0%     | 0%     |
| NA | 0%     | 0%     |
| NA | 0%     | 0%     |
| 0  | 0%     | 0%     |
| NA | 0%     | 0%     |
| A  | 16.66% | 1-20%  |
| NA | 16.66% | 1-20%  |
| 0  | 16.66% | 1-20%  |
| 0  | 16.66% | 1-20%  |
| NA | 16.66% | 1-20%  |
| NA | 17.64% | 1-20%  |
| NA | 17.64% | 1-20%  |
| A  | 17.64% | 1-20%  |
| 0  | 17.64% | 1-20%  |
| NA | 17.64% | 1-20%  |
| 0  | 17.64% | 1-20%  |
| NA | 42.85% | 21-50% |
| A  | 42.85% | 21-50% |
| A  | 42.85% | 21-50% |
| A  | 42.85% | 21-50% |
| 0  | 42.85% | 21-50% |
| 0  | 10%    | 1-20%  |
| NA | 10%    | 1-20%  |
| A  | 10%    | 1-20%  |
| 0  | 10%    | 1-20%  |
| A  | 16.66% | 1-20%  |

|    |        |        |
|----|--------|--------|
| 0  | 16.66% | 1-20%  |
| NA | 16.66% | 1-20%  |
| 0  | 16.66% | 1-20%  |
| 0  | 16.66% | 1-20%  |
| NA | 16.66% | 1-20%  |
| 0  | 16.66% | 1-20%  |
| 0  | 16.66% | 1-20%  |
| A  | 16.66% | 1-20%  |
| NA | 16%    | 1-20%  |
| NA | 16%    | 1-20%  |
| NA | 16%    | 1-20%  |
| 0  | 16%    | 1-20%  |
| 0  | 16%    | 1-20%  |
| A  | 16%    | 1-20%  |
| NA | 16%    | 1-20%  |
| NA | 20%    | 1-20%  |
| NA | 20%    | 1-20%  |
| 0  | 20%    | 1-20%  |
| 0  | 20%    | 1-20%  |
| A  | 20%    | 1-20%  |
| 0  | 20%    | 1-20%  |
| NA | 25%    | 21-50% |
| NA | 25%    | 21-50% |
| A  | 25%    | 21-50% |
| 0  | 25%    | 21-50% |
| NA | 25%    | 21-50% |
| 0  | 25%    | 21-50% |
| A  | 25%    | 21-50% |
| NA | 17.64% | 1-20%  |
| NA | 17.64% | 1-20%  |
| NA | 17.64% | 1-20%  |
| 0  | 17.64% | 1-20%  |
| NA | 17.64% | 1-20%  |
| A  | 17.64% | 1-20%  |
| A  | 20%    | 1-20%  |
| NA | 20%    | 1-20%  |
| 0  | 20%    | 1-20%  |
| NA | 20%    | 1-20%  |
| NA | 20%    | 1-20%  |
| 0  | 20%    | 1-20%  |
| NA | 20%    | 1-20%  |
| 0  | 20%    | 1-20%  |
| 0  | 20%    | 1-20%  |
| NA | 20%    | 1-20%  |
| 0  | 20%    | 1-20%  |
| A  | 20%    | 1-20%  |
| NA | 20%    | 1-20%  |
| A  | 20%    | 1-20%  |
| NA | 20%    | 1-20%  |
| NA | 13.63% | 1-20%  |

|    |        |        |
|----|--------|--------|
| A  | 13.63% | 1-20%  |
| A  | 13.63% | 1-20%  |
| 0  | 13.63% | 1-20%  |
| 0  | 13.63% | 1-20%  |
| NA | 13.63% | 1-20%  |
| NA | 13.63% | 1-20%  |
| NA | 20%    | 1-20%  |
| 0  | 20%    | 1-20%  |
| 0  | 20%    | 1-20%  |
| A  | 20%    | 1-20%  |
| NA | 20%    | 1-20%  |
| 0  | 20%    | 1-20%  |
| NA | 20%    | 1-20%  |
| NA | 22.72% | 21-50% |
| NA | 22.72% | 21-50% |
| 0  | 22.72% | 21-50% |
| A  | 22.72% | 21-50% |
| NA | 22.72% | 21-50% |
| NA | 22.72% | 21-50% |
| 0  | 22.72% | 21-50% |
| 0  | 22.72% | 21-50% |
| A  | 22.72% | 21-50% |
| 0  | 16.66% | 1-20%  |
| NA | 16.66% | 1-20%  |
| 0  | 16.66% | 1-20%  |
| NA | 16.66% | 1-20%  |
| A  | 16.66% | 1-20%  |
| NA | 16.66% | 1-20%  |
| 0  | 16.66% | 1-20%  |
| 0  | 20%    | 1-20%  |
| NA | 20%    | 1-20%  |
| NA | 20%    | 1-20%  |
| 0  | 20%    | 1-20%  |
| A  | 20%    | 1-20%  |
| NA | 20%    | 1-20%  |
| A  | 22.22% | 21-50% |
| NA | 22.22% | 21-50% |
| 0  | 22.22% | 21-50% |
| 0  | 22.22% | 21-50% |
| NA | 22.22% | 21-50% |
| NA | 22.22% | 21-50% |
| A  | 22.22% | 21-50% |
| 0  | 22.22% | 21-50% |
| NA | 22.22% | 21-50% |
| NA | 16.66% | 1-20%  |
| 0  | 16.66% | 1-20%  |
| NA | 16.66% | 1-20%  |
| A  | 16.66% | 1-20%  |
| 0  | 16.66% | 1-20%  |
| 0  | 16.66% | 1-20%  |

|    |        |        |
|----|--------|--------|
| A  | 28.57% | 21-50% |
| A  | 28.57% | 21-50% |
| 0  | 28.57% | 21-50% |
| NA | 28.57% | 21-50% |
| A  | 28.57% | 21-50% |
| NA | 28.57% | 21-50% |
| A  | 42.85% | 21-50% |
| NA | 42.85% | 21-50% |
| 0  | 42.85% | 21-50% |
| A  | 42.85% | 21-50% |
| NA | 42.85% | 21-50% |
| 0  | 42.85% | 21-50% |
| A  | 42.85% | 21-50% |
| A  | 20%    | 1-20%  |
| A  | 20%    | 1-20%  |
| NA | 20%    | 1-20%  |
| NA | 20%    | 1-20%  |
| 0  | 20%    | 1-20%  |
| NA | 12.50% | 1-20%  |
| A  | 12.50% | 1-20%  |
| 0  | 12.50% | 1-20%  |
| NA | 14.28% | 1-20%  |
| A  | 14.28% | 1-20%  |
| 0  | 14.28% | 1-20%  |
| A  | 14.28% | 1-20%  |
| NA | 14.28% | 1-20%  |
| NA | 14.28% | 1-20%  |
| A  | 20%    | 1-20%  |
| NA | 20%    | 1-20%  |
| NA | 20%    | 1-20%  |
| A  | 20%    | 1-20%  |
| NA | 20%    | 1-20%  |
| NA | 20%    | 1-20%  |
| 0  | 20%    | 1-20%  |
| NA | 12.50% | 1-20%  |
| NA | 12.50% | 1-20%  |
| 0  | 12.50% | 1-20%  |
| A  | 12.50% | 1-20%  |
| NA | 12.50% | 1-20%  |
| 0  | 12.50% | 1-20%  |
| 0  | 12.50% | 1-20%  |
| A  | 37.50% | 21-50% |
| A  | 37.50% | 21-50% |
| NA | 37.50% | 21-50% |
| A  | 37.50% | 21-50% |
| NA | 14.28% | 1-20%  |
| NA | 14.28% | 1-20%  |
| A  | 14.28% | 1-20%  |
| 0  | 14.28% | 1-20%  |
| NA | 33.33% | 21-50% |

|    |        |        |
|----|--------|--------|
| NA | 33.33% | 21-50% |
| A  | 33.33% | 21-50% |
| 0  | 33.33% | 21-50% |
| 0  | 33.33% | 21-50% |
| A  | 9.09%  | 1-20%  |
| NA | 9.09%  | 1-20%  |
| NA | 9.09%  | 1-20%  |
| A  | 9.09%  | 1-20%  |
| NA | 9.09%  | 1-20%  |
| 0  | 9.09%  | 1-20%  |
| NA | 0%     | 0%     |
| NA | 0%     | 0%     |
| NA | 0%     | 0%     |
| 0  | 0%     | 0%     |
| 0  | 0%     | 0%     |
| NA | 0%     | 0%     |
| A  | 22.22% | 21-50% |
| NA | 22.22% | 21-50% |
| 0  | 22.22% | 21-50% |
| 0  | 22.22% | 21-50% |
| A  | 22.22% | 21-50% |
| 0  | 22.22% | 21-50% |
| NA | 22.22% | 21-50% |
| NA | 23.80% | 1-20%  |
| 0  | 23.80% | 1-20%  |
| NA | 23.80% | 1-20%  |
| 0  | 23.80% | 1-20%  |
| A  | 23.80% | 1-20%  |
| 0  | 23.80% | 1-20%  |
| NA | 23.80% | 1-20%  |
| A  | 23.80% | 1-20%  |
| 0  |        |        |
| 0  |        |        |
| 0  |        |        |
| 0  |        |        |
| 0  |        |        |
| 0  |        |        |
| 0  |        |        |
| 0  |        |        |
| 0  |        |        |
| 0  |        |        |
| A  | 11.76% | 1-20%  |
| NA | 11.76% | 1-20%  |
| NA | 11.76% | 1-20%  |
| 0  | 11.76% | 1-20%  |
| NA | 11.76% | 1-20%  |
| NA | 11.76% | 1-20%  |
| 0  | 11.76% | 1-20%  |
| NA | 18.75% | 1-20%  |
| 0  | 18.75% | 1-20%  |

|    |        |        |
|----|--------|--------|
| NA | 18.75% | 1-20%  |
| 0  | 18.75% | 1-20%  |
| 0  | 18.75% | 1-20%  |
| A  | 18.75% | 1-20%  |
| A  | 18.75% | 1-20%  |
| 0  | 18.75% | 1-20%  |
| A  | 18.75% | 1-20%  |
| NA | 18.75% | 1-20%  |
| NA | 14.28% | 1-20%  |
| A  | 14.28% | 1-20%  |
| NA | 14.28% | 1-20%  |
| 0  | 14.28% | 1-20%  |
| 0  | 14.28% | 1-20%  |
| 0  | 14.28% | 1-20%  |
| NA | 0%     | 0%     |
| NA | 0%     | 0%     |
| 0  | 0%     | 0%     |
| 0  | 0%     | 0%     |
| 0  | 0%     | 0%     |
| NA | 42.85% | 21-50% |
| A  | 42.85% | 21-50% |
| NA | 42.85% | 21-50% |
| A  | 42.85% | 21-50% |
| NA | 42.85% | 21-50% |
| NA | 0%     | 0%     |
| 0  | 0%     | 0%     |
| NA | 15%    | 1-20%  |
| 0  | 15%    | 1-20%  |
| A  | 15%    | 1-20%  |
| NA | 15%    | 1-20%  |
| A  | 15%    | 1-20%  |
| 0  | 15%    | 1-20%  |
| 0  | 0%     | 0%     |
| NA | 0%     | 0%     |
| NA | 0%     | 0%     |
| 0  | 0%     | 0%     |
| 0  | 16.66% | 1-20%  |
| NA | 16.66% | 1-20%  |
| 0  | 16.66% | 1-20%  |
| A  | 16.66% | 1-20%  |
| 0  | 16.66% | 1-20%  |
| NA | 16.66% | 1-20%  |
| NA | 29%    | 21-50% |

|    |       |        |
|----|-------|--------|
| NA | 29%   | 21-50% |
| 0  | 29%   | 21-50% |
| NA | 29%   | 21-50% |
| NA | 29%   | 21-50% |
| A  | 29%   | 21-50% |
| A  | 29%   | 21-50% |
| NA | 29%   | 21-50% |
| A  | 8.69% | 1-20%  |
| 0  | 8.69% | 1-20%  |
| 0  | 8.69% | 1-20%  |
| NA | 8.69% | 1-20%  |
| NA | 8.69% | 1-20%  |
| NA | 8.69% | 1-20%  |



| Number of abortions in the last year | Elimination of aborted products | Stillbirth |
|--------------------------------------|---------------------------------|------------|
| (1-5)                                | Yes                             | Yes        |
| (1-5)                                | No                              | No         |
| (1-5)                                | Yes                             | No         |
| (1-5)                                | No                              | Yes        |
| (1-5)                                | No                              | No         |
| (6-10)                               | Yes                             | Yes        |
| (6-10)                               | No                              | Yes        |
| (6-10)                               | No                              | Yes        |

|        |       |     |
|--------|-------|-----|
| (6-10) | No    | Yes |
| (1-5)  | Yes   | Yes |
| (1-5)  | No    | No  |
| (1-5)  | Yes   | Yes |
| (1-5)  | No    | Yes |
|        | 0 Yes | Yes |
|        | 0 Yes | Yes |
|        | 0 Yes | Yes |

|        |      |     |
|--------|------|-----|
| (6-10) | No   | No  |
| (1-5)  | No   | Yes |
|        | 0 No | No  |
| (1-5)  | No   | Yes |
| (1-5)  | Yes  | Yes |
| (1-5)  | No   | No  |
|        | 0 No | No  |
|        | 0 No | No  |
|        | 0 No | No  |
|        | 0 No | No  |
|        | 0 No | No  |
| (1-5)  | No   | Yes |

|       |     |     |
|-------|-----|-----|
| (1-5) | No  | Yes |
| (1-5) | No  | Yes |
| (1-5) | No  | No  |
| (1-5) | No  | Yes |
|       | 0   |     |
|       | 0   |     |
|       | 0   |     |
|       | 0   |     |
| (1-5) | No  | Yes |
|       | 0   | Yes |
| (1-5) | No  | Yes |
| (1-5) | Yes | Yes |
| (1-5) | No  | No  |

[illegible]

[illegible]

|        |     |     |
|--------|-----|-----|
| (1-5)  | No  | Yes |
| (1-5)  | No  | No  |
| (1-5)  | No  | Yes |
| (1-5)  | No  | Yes |
| (1-5)  | No  | Yes |
| (1-5)  | No  | No  |
| (1-5)  | Yes | No  |
| (1-5)  | No  | Yes |
| (6-10) | No  | No  |
| (1-5)  | No  | Yes |

[illegible]



[illegible]

[illegible]

| New born death | Province | Region      | Environment | Season | Climate   |
|----------------|----------|-------------|-------------|--------|-----------|
| Yes            | Mila     | Plateau     | Peri-urban  | Spring | Sub-humid |
| Yes            | Mila     | Plateau     | Peri-urban  | Spring | Sub-humid |
| Yes            | Mila     | Plateau     | Peri-urban  | Spring | Sub-humid |
| Yes            | Mila     | Plateau     | Peri-urban  | Spring | Sub-humid |
| Yes            | Mila     | Plateau     | Peri-urban  | Spring | Sub-humid |
| Yes            | Mila     | Plateau     | Peri-urban  | Spring | Sub-humid |
| Yes            | Mila     | Plateau     | Peri-urban  | Spring | Sub-humid |
| Yes            | Mila     | Plateau     | Peri-urban  | Spring | Sub-humid |
| Yes            | Mila     | Plateau     | Peri-urban  | Spring | Sub-humid |
| Yes            | Mila     | Plateau     | Peri-urban  | Spring | Sub-humid |
| Yes            | Mila     | Plateau     | Peri-urban  | Spring | Sub-humid |
| No             | Mila     | Mountainous | Rural       | Winter | Humid     |
| No             | Mila     | Mountainous | Rural       | Winter | Humid     |
| No             | Mila     | Mountainous | Rural       | Winter | Humid     |
| No             | Mila     | Mountainous | Rural       | Winter | Humid     |
| No             | Mila     | Mountainous | Rural       | Winter | Humid     |
| Yes            | Mila     | Mountainous | Rural       | Summer | Humid     |
| Yes            | Mila     | Mountainous | Rural       | Summer | Humid     |
| Yes            | Mila     | Mountainous | Rural       | Summer | Humid     |
| Yes            | Mila     | Mountainous | Rural       | Summer | Humid     |
| Yes            | Mila     | Mountainous | Rural       | Summer | Humid     |
| Yes            | Mila     | Mountainous | Rural       | Summer | Humid     |
| Yes            | Mila     | Mountainous | Rural       | Summer | Humid     |
| Yes            | Mila     | Mountainous | Rural       | Summer | Humid     |
| Yes            | Mila     | Mountainous | Rural       | Summer | Humid     |
| Yes            | Mila     | Mountainous | Rural       | Summer | Humid     |
| Yes            | Mila     | Mountainous | Rural       | Summer | Humid     |
| Yes            | Mila     | Mountainous | Rural       | Summer | Humid     |
| Yes            | Mila     | Mountainous | Rural       | Summer | Humid     |
| Yes            | Mila     | Mountainous | Rural       | Summer | Humid     |
| No             | Mila     | Plateau     | Rural       | Summer | Humid     |
| No             | Mila     | Plateau     | Rural       | Summer | Humid     |
| No             | Mila     | Plateau     | Rural       | Summer | Humid     |
| No             | Mila     | Plateau     | Rural       | Summer | Humid     |
| No             | Mila     | Plateau     | Rural       | Winter | Humid     |
| No             | Mila     | Plateau     | Rural       | Winter | Humid     |
| No             | Mila     | Plateau     | Rural       | Winter | Humid     |
| No             | Mila     | Plateau     | Rural       | Winter | Humid     |
| No             | Mila     | Plateau     | Rural       | Winter | Humid     |
| No             | Mila     | Plateau     | Rural       | Winter | Humid     |
| No             | Mila     | Plateau     | Rural       | Winter | Humid     |
| No             | Mila     | Plateau     | Rural       | Winter | Humid     |
| No             | Mila     | Plateau     | Rural       | Winter | Humid     |
| Yes            | Mila     | Plateau     | Rural       | Spring | Humid     |
| Yes            | Mila     | Plateau     | Rural       | Spring | Humid     |

[illegible]

|     |            |             |            |        |           |
|-----|------------|-------------|------------|--------|-----------|
| Yes | Mila       | Plateau     | Rural      | Spring | Sub-humid |
| Yes | Mila       | Plateau     | Rural      | Spring | Sub-humid |
| Yes | Mila       | Plateau     | Rural      | Spring | Sub-humid |
| Yes | Mila       | Plateau     | Rural      | Spring | Sub-humid |
| Yes | Mila       | Plateau     | Rural      | Spring | Sub-humid |
| Yes | Mila       | Plateau     | Rural      | Spring | Sub-humid |
| Yes | Mila       | Plateau     | Rural      | Spring | Sub-humid |
| Yes | Mila       | Plateau     | Rural      | Spring | Sub-humid |
| No  | Mila       | Plateau     | Peri-urban | Winter | Sub-humid |
| No  | Mila       | Plateau     | Peri-urban | Winter | Sub-humid |
| No  | Mila       | Plateau     | Peri-urban | Winter | Sub-humid |
| No  | Mila       | Plateau     | Peri-urban | Winter | Sub-humid |
| No  | Mila       | Plateau     | Peri-urban | Winter | Sub-humid |
| No  | Mila       | Plateau     | Rural      | Winter | Humid     |
| No  | Mila       | Plateau     | Rural      | Winter | Humid     |
| No  | Mila       | Plateau     | Rural      | Winter | Humid     |
| No  | Mila       | Plateau     | Rural      | Winter | Humid     |
| No  | Mila       | Plateau     | Rural      | Winter | Humid     |
| No  | Mila       | Plateau     | Peri-urban | Spring | Humid     |
| No  | Mila       | Plateau     | Peri-urban | Spring | Humid     |
| No  | Mila       | Plateau     | Peri-urban | Spring | Humid     |
| No  | Mila       | Plateau     | Peri-urban | Spring | Humid     |
| No  | Mila       | Plateau     | Peri-urban | Spring | Humid     |
| No  | Mila       | Plateau     | Rural      | Spring | Sub-humid |
| No  | Mila       | Plateau     | Rural      | Spring | Sub-humid |
| No  | Mila       | Plateau     | Rural      | Spring | Sub-humid |
| No  | Mila       | Plateau     | Rural      | Spring | Sub-humid |
| No  | Mila       | Plateau     | Rural      | Spring | Sub-humid |
| No  | Mila       | Mountainous | Rural      | Winter | Humid     |
| No  | Mila       | Mountainous | Rural      | Winter | Humid     |
| No  | Mila       | Mountainous | Rural      | Winter | Humid     |
| No  | Mila       | Mountainous | Rural      | Winter | Humid     |
| No  | Mila       | Mountainous | Rural      | Winter | Humid     |
| No  | Mila       | Plateau     | Rural      | Spring | Sub-humid |
| No  | Mila       | Plateau     | Rural      | Spring | Sub-humid |
| No  | Mila       | Plateau     | Rural      | Spring | Sub-humid |
| No  | Mila       | Plateau     | Rural      | Spring | Sub-humid |
| No  | Mila       | Plateau     | Rural      | Spring | Sub-humid |
| No  | Mila       | Plateau     | Rural      | Spring | Sub-humid |
| No  | Constantin | Mountainous | Rural      | Summer | Sub-humid |
| No  | Constantin | Mountainous | Rural      | Summer | Sub-humid |
| No  | Constantin | Mountainous | Rural      | Summer | Sub-humid |
| No  | Constantin | Mountainous | Rural      | Summer | Sub-humid |
| No  | Constantin | Mountainous | Rural      | Summer | Sub-humid |
| No  | Constantin | Plateau     | Rural      | Spring | Humid     |
| No  | Constantin | Plateau     | Rural      | Spring | Humid     |
| No  | Constantin | Plateau     | Rural      | Spring | Humid     |
| No  | Constantin | Plateau     | Rural      | Spring | Humid     |
| No  | Constantin | Plateau     | Rural      | Spring | Humid     |

[illegible]

|     |            |             |            |        |           |
|-----|------------|-------------|------------|--------|-----------|
| Yes | Constantin | Plateau     | Peri-urban | Autumn | Humid     |
| Yes | Constantin | Plateau     | Peri-urban | Autumn | Humid     |
| Yes | Constantin | Plateau     | Peri-urban | Autumn | Humid     |
| Yes | Constantin | Plateau     | Peri-urban | Autumn | Humid     |
| Yes | Constantin | Plateau     | Peri-urban | Autumn | Humid     |
| Yes | Constantin | Plateau     | Peri-urban | Autumn | Humid     |
| Yes | Constantin | Plateau     | Peri-urban | Autumn | Humid     |
| Yes | Constantin | Plateau     | Rural      | Summer | Humid     |
| Yes | Constantin | Plateau     | Rural      | Summer | Humid     |
| Yes | Constantin | Plateau     | Rural      | Summer | Humid     |
| Yes | Constantin | Plateau     | Rural      | Summer | Humid     |
| Yes | Constantin | Plateau     | Rural      | Summer | Humid     |
| Yes | Constantin | Plateau     | Rural      | Summer | Humid     |
| No  | Constantin | Plateau     | Rural      | Spring | Sub-humid |
| No  | Constantin | Plateau     | Rural      | Spring | Sub-humid |
| No  | Constantin | Plateau     | Rural      | Spring | Sub-humid |
| No  | Constantin | Plateau     | Rural      | Spring | Sub-humid |
| No  | Constantin | Plateau     | Rural      | Spring | Sub-humid |
| No  | Constantin | Plateau     | Rural      | Spring | Sub-humid |
| No  | Mila       | Plateau     | Rural      | Summer | Humid     |
| No  | Mila       | Plateau     | Rural      | Summer | Humid     |
| No  | Mila       | Plateau     | Rural      | Summer | Humid     |
| No  | Mila       | Plateau     | Rural      | Summer | Humid     |
| No  | Mila       | Plateau     | Rural      | Summer | Humid     |
| No  | Mila       | Plateau     | Rural      | Summer | Humid     |
| Yes | Mila       | Mountainous | Rural      | Winter | Semi-arid |
| Yes | Mila       | Mountainous | Rural      | Winter | Semi-arid |
| Yes | Mila       | Mountainous | Rural      | Winter | Semi-arid |
| Yes | Mila       | Mountainous | Rural      | Winter | Semi-arid |
| Yes | Mila       | Mountainous | Rural      | Winter | Semi-arid |
| Yes | Constantin | Plateau     | Peri-urban | Spring | Sub-humid |
| Yes | Constantin | Plateau     | Peri-urban | Spring | Sub-humid |
| Yes | Constantin | Plateau     | Peri-urban | Spring | Sub-humid |
| Yes | Constantin | Plateau     | Peri-urban | Spring | Sub-humid |
| Yes | Constantin | Plateau     | Peri-urban | Spring | Sub-humid |
| No  | Constantin | Plateau     | Rural      | Autumn | Humid     |
| No  | Constantin | Plateau     | Rural      | Autumn | Humid     |
| No  | Constantin | Plateau     | Rural      | Autumn | Humid     |
| No  | Constantin | Plateau     | Rural      | Autumn | Humid     |
| No  | Constantin | Mountainous | Rural      | Spring | Sub-humid |
| No  | Constantin | Mountainous | Rural      | Spring | Sub-humid |
| No  | Constantin | Mountainous | Rural      | Spring | Sub-humid |
| No  | Constantin | Mountainous | Rural      | Spring | Sub-humid |
| No  | Mila       | Mountainous | Rural      | Summer | Humid     |

[illegible]



|     |            |             |            |        |           |
|-----|------------|-------------|------------|--------|-----------|
| No  | Mila       | Mountainous | Rural      | Spring | Humid     |
| No  | Mila       | Mountainous | Rural      | Spring | Humid     |
| No  | Mila       | Mountainous | Rural      | Spring | Humid     |
| No  | Mila       | Mountainous | Rural      | Spring | Humid     |
| No  | Mila       | Mountainous | Rural      | Spring | Humid     |
| No  | Mila       | Mountainous | Rural      | Spring | Humid     |
| Yes | Constantin | Plateau     | Rural      | Autumn | Sub-humid |
| Yes | Constantin | Plateau     | Rural      | Autumn | Sub-humid |
| Yes | Constantin | Plateau     | Rural      | Autumn | Sub-humid |
| Yes | Constantin | Plateau     | Rural      | Autumn | Sub-humid |
| Yes | Constantin | Plateau     | Rural      | Autumn | Sub-humid |
| Yes | Constantin | Plateau     | Rural      | Autumn | Sub-humid |
| Yes | Constantin | Plateau     | Rural      | Autumn | Sub-humid |
| Yes | Constantin | Plateau     | Rural      | Winter | Humid     |
| Yes | Constantin | Plateau     | Rural      | Winter | Humid     |
| Yes | Constantin | Plateau     | Rural      | Winter | Humid     |
| Yes | Constantin | Plateau     | Rural      | Winter | Humid     |
| Yes | Constantin | Plateau     | Rural      | Winter | Humid     |
| No  | Mila       | Mountainous | Rural      | Spring | Humid     |
| No  | Mila       | Mountainous | Rural      | Spring | Humid     |
| No  | Mila       | Mountainous | Rural      | Spring | Humid     |
| Yes | Constantin | Mountainous | Rural      | Winter | Sub-humid |
| Yes | Constantin | Mountainous | Rural      | Winter | Sub-humid |
| Yes | Constantin | Mountainous | Rural      | Winter | Sub-humid |
| Yes | Constantin | Mountainous | Rural      | Winter | Sub-humid |
| Yes | Constantin | Mountainous | Rural      | Winter | Sub-humid |
| Yes | Constantin | Mountainous | Rural      | Winter | Sub-humid |
| Yes | Constantin | Plateau     | Rural      | Spring | Humid     |
| Yes | Constantin | Plateau     | Rural      | Spring | Humid     |
| Yes | Constantin | Plateau     | Rural      | Spring | Humid     |
| Yes | Constantin | Plateau     | Rural      | Spring | Humid     |
| Yes | Constantin | Plateau     | Rural      | Spring | Humid     |
| Yes | Constantin | Plateau     | Rural      | Spring | Humid     |
| Yes | Constantin | Plateau     | Peri-urban | Spring | Sub-humid |
| Yes | Constantin | Plateau     | Peri-urban | Spring | Sub-humid |
| Yes | Constantin | Plateau     | Peri-urban | Spring | Sub-humid |
| Yes | Constantin | Plateau     | Peri-urban | Spring | Sub-humid |
| Yes | Constantin | Plateau     | Peri-urban | Spring | Sub-humid |
| Yes | Constantin | Plateau     | Peri-urban | Spring | Sub-humid |
| Yes | Constantin | Plateau     | Peri-urban | Spring | Sub-humid |
| No  | Mila       | Plateau     | Rural      | Winter | Humid     |
| No  | Mila       | Plateau     | Rural      | Winter | Humid     |
| No  | Mila       | Plateau     | Rural      | Winter | Humid     |
| No  | Mila       | Plateau     | Rural      | Winter | Humid     |
| Yes | Mila       | Mountainous | Rural      | Spring | Sub-humid |
| Yes | Mila       | Mountainous | Rural      | Spring | Sub-humid |
| Yes | Mila       | Mountainous | Rural      | Spring | Sub-humid |
| Yes | Mila       | Mountainous | Rural      | Spring | Sub-humid |
| No  | Constantin | Mountainous | Rural      | Summer | Sub-humid |

|     |            |             |            |        |           |
|-----|------------|-------------|------------|--------|-----------|
| No  | Constantin | Mountainous | Rural      | Summer | Sub-humid |
| No  | Constantin | Mountainous | Rural      | Summer | Sub-humid |
| No  | Constantin | Mountainous | Rural      | Summer | Sub-humid |
| No  | Constantin | Mountainous | Rural      | Summer | Sub-humid |
| Yes | Mila       | Mountainous | Rural      | Spring | Humid     |
| Yes | Mila       | Mountainous | Rural      | Spring | Humid     |
| Yes | Mila       | Mountainous | Rural      | Spring | Humid     |
| Yes | Mila       | Mountainous | Rural      | Spring | Humid     |
| Yes | Mila       | Mountainous | Rural      | Spring | Humid     |
| Yes | Mila       | Mountainous | Rural      | Spring | Humid     |
| Yes | Guelma     | Mountainous | Peri-urban | Autumn | Sub-humid |
| Yes | Guelma     | Mountainous | Peri-urban | Autumn | Sub-humid |
| Yes | Guelma     | Mountainous | Peri-urban | Autumn | Sub-humid |
| Yes | Guelma     | Mountainous | Peri-urban | Autumn | Sub-humid |
| Yes | Guelma     | Mountainous | Peri-urban | Autumn | Sub-humid |
| Yes | Guelma     | Mountainous | Peri-urban | Autumn | Sub-humid |
| No  | Guelma     | Mountainous | Peri-urban | Spring | Humid     |
| No  | Guelma     | Mountainous | Peri-urban | Spring | Humid     |
| No  | Guelma     | Mountainous | Peri-urban | Spring | Humid     |
| No  | Guelma     | Mountainous | Peri-urban | Spring | Humid     |
| No  | Guelma     | Mountainous | Peri-urban | Spring | Humid     |
| No  | Guelma     | Mountainous | Peri-urban | Spring | Humid     |
| No  | Guelma     | Mountainous | Peri-urban | Spring | Humid     |
| No  | Guelma     | Mountainous | Peri-urban | Spring | Humid     |
| No  | Guelma     | Plateau     | Rural      | Winter | Sub-humid |
| No  | Guelma     | Plateau     | Rural      | Winter | Sub-humid |
| No  | Guelma     | Plateau     | Rural      | Winter | Sub-humid |
| No  | Guelma     | Plateau     | Rural      | Winter | Sub-humid |
| No  | Guelma     | Plateau     | Rural      | Winter | Sub-humid |
| No  | Guelma     | Plateau     | Rural      | Winter | Sub-humid |
| No  | Guelma     | Plateau     | Rural      | Winter | Sub-humid |
| No  | Guelma     | Plateau     | Rural      | Winter | Sub-humid |
|     | El-Taref   | Coastal     | Rural      | Summer | Humid     |
|     | El-Taref   | Coastal     | Rural      | Summer | Humid     |
|     | El-Taref   | Coastal     | Rural      | Summer | Humid     |
|     | El-Taref   | Coastal     | Rural      | Summer | Humid     |
|     | El-Taref   | Coastal     | Rural      | Summer | Humid     |
|     | El-Taref   | Coastal     | Rural      | Summer | Humid     |
|     | El-Taref   | Coastal     | Rural      | Summer | Humid     |
|     | El-Taref   | Coastal     | Rural      | Summer | Humid     |
|     | El-Taref   | Coastal     | Rural      | Summer | Humid     |
| Yes | Guelma     | Plateau     | Rural      | Autumn | Semi-arid |
| Yes | Guelma     | Plateau     | Rural      | Autumn | Semi-arid |
| Yes | Guelma     | Plateau     | Rural      | Autumn | Semi-arid |
| Yes | Guelma     | Plateau     | Rural      | Autumn | Semi-arid |
| Yes | Guelma     | Plateau     | Rural      | Autumn | Semi-arid |
| Yes | Guelma     | Plateau     | Rural      | Autumn | Semi-arid |
| Yes | Guelma     | Plateau     | Rural      | Autumn | Semi-arid |
| No  | Guelma     | Mountainous | Rural      | Spring | Sub-humid |
| No  | Guelma     | Mountainous | Rural      | Spring | Sub-humid |

[illegible]

[illegible]

Month of sam; Year of san ELISA Resul N° sample

|         |      |   |    |
|---------|------|---|----|
| March   | 2020 | 0 | 1  |
| March   | 2020 | 0 | 2  |
| March   | 2020 | 0 | 3  |
| March   | 2020 | 0 | 4  |
| March   | 2020 | 0 | 5  |
| March   | 2020 | 1 | 6  |
| March   | 2020 | 1 | 7  |
| March   | 2020 | 1 | 8  |
| March   | 2020 | 1 | 9  |
| March   | 2020 | 1 | 10 |
| March   | 2020 | 1 | 11 |
| March   | 2020 | 1 | 12 |
| January | 2020 | 1 | 13 |
| January | 2020 | 1 | 14 |
| January | 2020 | 1 | 15 |
| January | 2020 | 1 | 16 |
| January | 2020 | 1 | 17 |
| June    | 2020 | 1 | 18 |
| June    | 2020 | 1 | 19 |
| June    | 2020 | 1 | 20 |
| June    | 2020 | 1 | 21 |
| June    | 2020 | 1 | 22 |
| June    | 2020 | 1 | 23 |
| June    | 2020 | 1 | 24 |
| June    | 2020 | 1 | 25 |
| june    | 2020 | 1 | 26 |
| June    | 2020 | 1 | 27 |
| June    | 2020 | 1 | 28 |
| June    | 2020 | 1 | 29 |
| June    | 2020 | 1 | 30 |
| June    | 2020 | 0 | 31 |
| June    | 2020 | 1 | 32 |
| June    | 2020 | 1 | 33 |
| June    | 2020 | 1 | 34 |
| June    | 2020 | 1 | 35 |
| June    | 2020 | 1 | 36 |
| January | 2020 | 1 | 37 |
| January | 2020 | 1 | 38 |
| January | 2020 | 1 | 39 |
| January | 2020 | 1 | 40 |
| January | 2020 | 0 | 41 |
| January | 2020 | 0 | 42 |
| January | 2020 | 0 | 43 |
| January | 2020 | 1 | 44 |
| January | 2020 | 1 | 45 |
| March   | 2020 | 1 | 46 |
| March   | 2020 | 1 | 47 |

|         |      |   |    |
|---------|------|---|----|
| March   | 2020 | 1 | 48 |
| March   | 2020 | 0 | 49 |
| March   | 2020 | 0 | 50 |
| March   | 2020 | 0 | 51 |
| March   | 2020 | 0 | 52 |
| March   | 2020 | 0 | 53 |
| March   | 2020 | 1 | 54 |
| March   | 2020 | 1 | 55 |
| April   | 2020 | 0 | 56 |
| April   | 2020 | 0 | 57 |
| April   | 2020 | 0 | 58 |
| April   | 2020 | 0 | 59 |
| April   | 2020 | 0 | 60 |
| April   | 2020 | 1 | 61 |
| April   | 2020 | 1 | 62 |
| April   | 2020 | 0 | 63 |
| April   | 2020 | 0 | 64 |
| April   | 2020 | 1 | 65 |
| April   | 2020 | 0 | 66 |
| Juley   | 2020 | 0 | 67 |
| Juley   | 2020 | 0 | 68 |
| Juley   | 2020 | 0 | 69 |
| Juley   | 2020 | 0 | 70 |
| Juley   | 2020 | 1 | 71 |
| January | 2020 | 1 | 72 |
| January | 2020 | 1 | 73 |
| January | 2020 | 1 | 74 |
| January | 2020 | 1 | 75 |
| January | 2020 | 0 | 76 |
| January | 2020 | 1 | 77 |
| January | 2020 | 0 | 78 |
| April   | 2020 | 0 | 79 |
| April   | 2020 | 1 | 80 |
| April   | 2020 | 1 | 81 |
| April   | 2020 | 1 | 82 |
| April   | 2020 | 1 | 83 |
| April   | 2020 | 1 | 84 |
| April   | 2020 | 1 | 85 |
| April   | 2020 | 1 | 86 |
| January | 2021 | 1 | 87 |
| January | 2021 | 1 | 88 |
| January | 2021 | 1 | 89 |
| January | 2021 | 1 | 90 |
| January | 2021 | 0 | 91 |
| January | 2021 | 0 | 92 |
| January | 2021 | 0 | 93 |
| January | 2021 | 0 | 94 |
| March   | 2021 | 0 | 95 |
| March   | 2021 | 1 | 96 |
| March   | 2021 | 1 | 97 |

|          |      |   |     |
|----------|------|---|-----|
| March    | 2021 | 0 | 98  |
| March    | 2021 | 1 | 99  |
| March    | 2021 | 1 | 100 |
| March    | 2021 | 0 | 101 |
| March    | 2021 | 1 | 102 |
| March    | 2021 | 0 | 103 |
| March    | 2021 | 0 | 104 |
| March    | 2021 | 0 | 105 |
| January  | 2021 | 0 | 106 |
| January  | 2021 | 1 | 107 |
| January  | 2021 | 1 | 108 |
| January  | 2021 | 0 | 109 |
| January  | 2021 | 0 | 110 |
| February | 2021 | 1 | 111 |
| February | 2021 | 0 | 112 |
| February | 2021 | 0 | 113 |
| February | 2021 | 0 | 114 |
| February | 2021 | 0 | 115 |
| March    | 2021 | 0 | 116 |
| March    | 2021 | 0 | 117 |
| March    | 2021 | 0 | 118 |
| March    | 2021 | 0 | 119 |
| March    | 2021 | 0 | 120 |
| April    | 2021 | 1 | 121 |
| April    | 2021 | 0 | 122 |
| April    | 2021 | 0 | 123 |
| April    | 2021 | 1 | 124 |
| April    | 2021 | 1 | 125 |
| April    | 2021 | 1 | 126 |
| February | 2021 | 1 | 127 |
| February | 2021 | 0 | 128 |
| February | 2021 | 1 | 129 |
| February | 2021 | 1 | 130 |
| February | 2021 | 0 | 131 |
| April    | 2021 | 0 | 132 |
| April    | 2021 | 0 | 133 |
| April    | 2021 | 0 | 134 |
| April    | 2021 | 1 | 135 |
| April    | 2021 | 1 | 136 |
| April    | 2021 | 0 | 137 |
| June     | 2021 | 1 | 140 |
| June     | 2021 | 0 | 141 |
| June     | 2021 | 0 | 142 |
| June     | 2021 | 1 | 143 |
| June     | 2021 | 0 | 144 |
| May      | 2021 | 0 | 145 |
| May      | 2021 | 1 | 146 |
| May      | 2021 | 1 | 147 |
| May      | 2021 | 0 | 148 |
| May      | 2021 | 0 | 149 |

|           |      |   |     |
|-----------|------|---|-----|
| May       | 2021 | 0 | 150 |
| May       | 2021 | 1 | 151 |
| January   | 2021 | 0 | 153 |
| January   | 2021 | 0 | 154 |
| January   | 2021 | 1 | 155 |
| January   | 2021 | 0 | 156 |
| April     | 2021 | 0 | 157 |
| April     | 2021 | 1 | 158 |
| April     | 2021 | 0 | 159 |
| April     | 2021 | 1 | 160 |
| June      | 2021 | 0 | 161 |
| June      | 2021 | 0 | 162 |
| June      | 2021 | 0 | 163 |
| June      | 2021 | 1 | 164 |
| May       | 2021 | 0 | 165 |
| May       | 2021 | 0 | 166 |
| May       | 2021 | 1 | 167 |
| May       | 2021 | 0 | 168 |
| May       | 2021 | 0 | 169 |
| May       | 2021 | 1 | 170 |
| May       | 2021 | 0 | 171 |
| May       | 2021 | 0 | 172 |
| May       | 2021 | 1 | 173 |
| May       | 2021 | 1 | 174 |
| May       | 2021 | 1 | 175 |
| May       | 2021 | 1 | 176 |
| May       | 2021 | 1 | 177 |
| May       | 2021 | 1 | 178 |
| May       | 2021 | 1 | 179 |
| January   | 2021 | 0 | 180 |
| January   | 2021 | 1 | 181 |
| January   | 2021 | 0 | 182 |
| January   | 2021 | 1 | 183 |
| January   | 2021 | 0 | 184 |
| February  | 2021 | 0 | 185 |
| February  | 2021 | 0 | 186 |
| February  | 2021 | 0 | 187 |
| February  | 2021 | 1 | 188 |
| February  | 2021 | 0 | 189 |
| February  | 2021 | 0 | 190 |
| March     | 2021 | 1 | 191 |
| March     | 2021 | 0 | 192 |
| March     | 2021 | 1 | 193 |
| March     | 2021 | 1 | 194 |
| March     | 2021 | 1 | 195 |
| January   | 2022 | 1 | 196 |
| January   | 2022 | 1 | 197 |
| January   | 2022 | 1 | 198 |
| January   | 2022 | 1 | 199 |
| September | 2022 | 1 | 200 |



|           |      |   |     |
|-----------|------|---|-----|
| September | 2022 | 1 | 201 |
| September | 2022 | 1 | 202 |
| September | 2022 | 1 | 203 |
| September | 2022 | 1 | 204 |
| September | 2022 | 1 | 205 |
| September | 2022 | 1 | 206 |
| September | 2022 | 1 | 207 |
| September | 2022 | 1 | 208 |
| June      | 2022 | 0 | 209 |
| June      | 2022 | 1 | 210 |
| June      | 2022 | 1 | 211 |
| June      | 2022 | 1 | 212 |
| June      | 2022 | 1 | 213 |
| June      | 2022 | 1 | 214 |
| June      | 2022 | 0 | 215 |
| April     | 2022 | 0 | 216 |
| April     | 2022 | 0 | 217 |
| April     | 2022 | 0 | 218 |
| April     | 2022 | 0 | 219 |
| April     | 2022 | 1 | 220 |
| April     | 2022 | 1 | 221 |
| June      | 2022 | 1 | 222 |
| June      | 2022 | 1 | 223 |
| June      | 2022 | 0 | 224 |
| June      | 2022 | 1 | 225 |
| June      | 2022 | 1 | 226 |
| June      | 2022 | 1 | 227 |
| June      | 2022 | 1 | 228 |
| February  | 2022 | 0 | 229 |
| February  | 2022 | 1 | 230 |
| February  | 2022 | 1 | 231 |
| February  | 2022 | 1 | 232 |
| February  | 2022 | 1 | 233 |
| February  | 2022 | 0 | 234 |
| March     | 2022 | 1 | 235 |
| March     | 2022 | 0 | 236 |
| March     | 2022 | 0 | 237 |
| March     | 2022 | 0 | 238 |
| March     | 2022 | 0 | 239 |
| March     | 2022 | 1 | 240 |
| September | 2022 | 1 | 241 |
| September | 2022 | 1 | 242 |
| September | 2022 | 1 | 243 |
| September | 2022 | 1 | 244 |
| March     | 2022 | 1 | 245 |
| March     | 2022 | 0 | 246 |
| March     | 2022 | 1 | 247 |
| March     | 2022 | 0 | 248 |
| March     | 2022 | 1 | 249 |
| June      | 2022 | 0 | 250 |

|           |      |   |     |
|-----------|------|---|-----|
| June      | 2022 | 1 | 251 |
| June      | 2022 | 0 | 252 |
| June      | 2022 | 1 | 253 |
| June      | 2022 | 1 | 254 |
| June      | 2022 | 1 | 255 |
| June      | 2022 | 1 | 256 |
| June      | 2022 | 1 | 257 |
| June      | 2022 | 1 | 258 |
| June      | 2022 | 0 | 259 |
| June      | 2022 | 0 | 260 |
| June      | 2022 | 1 | 261 |
| June      | 2022 | 1 | 262 |
| June      | 2022 | 1 | 263 |
| September | 2022 | 1 | 264 |
| September | 2022 | 1 | 265 |
| September | 2022 | 0 | 266 |
| September | 2022 | 1 | 267 |
| September | 2022 | 0 | 268 |
| September | 2022 | 1 | 269 |
| September | 2022 | 1 | 270 |
| September | 2022 | 1 | 271 |
| September | 2022 | 1 | 272 |
| October   | 2022 | 1 | 273 |
| October   | 2022 | 0 | 274 |
| October   | 2022 | 1 | 275 |
| October   | 2022 | 1 | 276 |
| October   | 2022 | 1 | 277 |
| October   | 2022 | 0 | 278 |
| October   | 2022 | 0 | 279 |
| February  | 2022 | 1 | 280 |
| February  | 2022 | 0 | 281 |
| February  | 2022 | 1 | 282 |
| February  | 2022 | 0 | 283 |
| February  | 2022 | 1 | 284 |
| February  | 2022 | 0 | 285 |
| March     | 2022 | 1 | 286 |
| March     | 2022 | 0 | 287 |
| March     | 2022 | 1 | 288 |
| March     | 2022 | 0 | 289 |
| March     | 2022 | 1 | 290 |
| March     | 2022 | 1 | 291 |
| March     | 2022 | 1 | 292 |
| March     | 2022 | 1 | 293 |
| March     | 2022 | 1 | 294 |
| September | 2022 | 0 | 295 |
| September | 2022 | 1 | 296 |
| September | 2022 | 0 | 297 |
| September | 2022 | 0 | 298 |
| September | 2022 | 1 | 299 |
| September | 2022 | 0 | 300 |

|          |      |   |     |
|----------|------|---|-----|
| April    | 2022 | 1 | 301 |
| April    | 2022 | 1 | 302 |
| April    | 2022 | 0 | 303 |
| April    | 2022 | 1 | 304 |
| April    | 2022 | 1 | 305 |
| April    | 2022 | 1 | 306 |
| October  | 2022 | 1 | 307 |
| October  | 2022 | 1 | 308 |
| October  | 2022 | 1 | 309 |
| October  | 2022 | 1 | 310 |
| October  | 2022 | 1 | 311 |
| October  | 2022 | 1 | 312 |
| October  | 2022 | 1 | 313 |
| January  | 2022 | 1 | 314 |
| January  | 2022 | 1 | 315 |
| January  | 2022 | 1 | 316 |
| January  | 2022 | 1 | 317 |
| January  | 2022 | 0 | 318 |
| March    | 2022 | 0 | 319 |
| March    | 2022 | 1 | 320 |
| March    | 2022 | 0 | 321 |
| February | 2022 | 0 | 322 |
| February | 2022 | 1 | 323 |
| February | 2022 | 1 | 324 |
| February | 2022 | 0 | 325 |
| February | 2022 | 0 | 326 |
| February | 2022 | 0 | 327 |
| April    | 2022 | 0 | 328 |
| April    | 2022 | 0 | 329 |
| April    | 2022 | 0 | 330 |
| April    | 2022 | 1 | 331 |
| April    | 2022 | 0 | 332 |
| April    | 2022 | 0 | 333 |
| April    | 2022 | 0 | 334 |
| April    | 2022 | 0 | 335 |
| April    | 2022 | 0 | 336 |
| April    | 2022 | 0 | 337 |
| April    | 2022 | 1 | 338 |
| April    | 2022 | 1 | 339 |
| April    | 2022 | 0 | 340 |
| April    | 2022 | 0 | 341 |
| February | 2022 | 0 | 342 |
| February | 2022 | 0 | 343 |
| February | 2022 | 0 | 344 |
| February | 2022 | 0 | 345 |
| March    | 2022 | 0 | 346 |
| March    | 2022 | 1 | 347 |
| March    | 2022 | 0 | 348 |
| March    | 2022 | 1 | 349 |
| Juley    | 2022 | 0 | 350 |

|         |      |   |     |
|---------|------|---|-----|
| Juley   | 2022 | 1 | 351 |
| Juley   | 2022 | 0 | 352 |
| Juley   | 2022 | 0 | 353 |
| Juley   | 2022 | 0 | 354 |
| May     | 2022 | 1 | 355 |
| May     | 2022 | 1 | 356 |
| May     | 2022 | 0 | 357 |
| May     | 2022 | 0 | 358 |
| May     | 2022 | 0 | 359 |
| May     | 2022 | 1 | 360 |
| October | 2021 | 1 | 361 |
| October | 2021 | 0 | 362 |
| October | 2021 | 1 | 363 |
| October | 2021 | 1 | 364 |
| October | 2021 | 1 | 365 |
| October | 2021 | 0 | 366 |
| March   | 2021 | 1 | 367 |
| March   | 2021 | 0 | 368 |
| March   | 2021 | 0 | 369 |
| March   | 2021 | 1 | 370 |
| March   | 2021 | 1 | 371 |
| March   | 2021 | 1 | 372 |
| March   | 2021 | 0 | 373 |
| January | 2021 | 1 | 374 |
| January | 2021 | 0 | 375 |
| January | 2021 | 0 | 376 |
| January | 2021 | 1 | 377 |
| January | 2021 | 1 | 378 |
| January | 2021 | 0 | 379 |
| January | 2021 | 0 | 380 |
| January | 2021 | 1 | 381 |
| Juley   | 2021 | 1 | 382 |
| Juley   | 2021 | 1 | 383 |
| Juley   | 2021 | 1 | 384 |
| Juley   | 2021 | 1 | 385 |
| Juley   | 2021 | 1 | 386 |
| Juley   | 2021 | 0 | 387 |
| Juley   | 2021 | 0 | 388 |
| Juley   | 2021 | 1 | 389 |
| Juley   | 2021 | 0 | 390 |
| Juley   | 2021 | 1 | 391 |
| October | 2021 | 0 | 392 |
| October | 2021 | 0 | 393 |
| October | 2021 | 1 | 394 |
| October | 2021 | 1 | 395 |
| October | 2021 | 0 | 396 |
| October | 2021 | 1 | 397 |
| October | 2021 | 1 | 398 |
| April   | 2021 | 0 | 399 |
| April   | 2021 | 1 | 400 |

|          |      |   |     |
|----------|------|---|-----|
| April    | 2021 | 0 | 401 |
| April    | 2021 | 1 | 402 |
| April    | 2021 | 1 | 403 |
| April    | 2021 | 1 | 404 |
| April    | 2021 | 0 | 405 |
| April    | 2021 | 1 | 406 |
| April    | 2021 | 1 | 407 |
| April    | 2021 | 0 | 408 |
| April    | 2021 | 1 | 409 |
| April    | 2021 | 0 | 410 |
| April    | 2021 | 0 | 411 |
| Juley    | 2022 | 1 | 570 |
| Juley    | 2022 | 0 | 571 |
| Juley    | 2022 | 0 | 572 |
| Juley    | 2022 | 0 | 573 |
| Juley    | 2022 | 0 | 574 |
| Juley    | 2022 | 0 | 575 |
| Juley    | 2022 | 0 | 576 |
| Juley    | 2022 | 0 | 577 |
| Juley    | 2022 | 0 | 578 |
| Juley    | 2022 | 0 | 579 |
| Juley    | 2022 | 0 | 580 |
| March    | 2022 | 0 | 581 |
| March    | 2022 | 0 | 582 |
| March    | 2022 | 1 | 583 |
| March    | 2022 | 1 | 584 |
| March    | 2022 | 1 | 585 |
| April    | 2022 | 1 | 586 |
| April    | 2022 | 0 | 587 |
| April    | 2022 | 0 | 588 |
| April    | 2022 | 1 | 589 |
| April    | 2022 | 0 | 590 |
| April    | 2022 | 0 | 591 |
| Juley    | 2022 | 0 | 592 |
| Juley    | 2022 | 1 | 593 |
| Juley    | 2022 | 1 | 594 |
| Juley    | 2022 | 0 | 595 |
| Juley    | 2022 | 0 | 596 |
| Juley    | 2022 | 0 | 597 |
| Juley    | 2022 | 0 | 598 |
| Juley    | 2022 | 0 | 599 |
| Juley    | 2022 | 0 | 600 |
| Juley    | 2022 | 0 | 601 |
| April    | 2022 | 0 | 602 |
| April    | 2022 | 0 | 603 |
| April    | 2022 | 0 | 604 |
| April    | 2022 | 1 | 605 |
| April    | 2022 | 0 | 606 |
| April    | 2022 | 0 | 607 |
| February | 2023 | 0 | 608 |

|          |      |   |     |
|----------|------|---|-----|
| February | 2023 | 0 | 609 |
| February | 2023 | 0 | 610 |
| February | 2023 | 0 | 611 |
| February | 2023 | 0 | 612 |
| February | 2023 | 0 | 613 |
| February | 2023 | 1 | 614 |
| February | 2023 | 0 | 615 |
| March    | 2023 | 0 | 616 |
| March    | 2023 | 0 | 617 |
| March    | 2023 | 0 | 618 |
| March    | 2023 | 1 | 619 |
| March    | 2023 | 0 | 620 |
| March    | 2023 | 1 | 621 |
